# Supplementary material for: Robust immunoscore model to predict the response to anti-PD1 therapy in melanoma
Source: Aging (Albany NY). 2019 Dec 3;11(23):11576–90. doi: 10.18632/aging.102556 (PMC6932919; doi:10.18632/aging.102556)
Supplement: Supplementary Figures [file aging-11-102556-s004..pdf]

## SUPPLEMENTARY FIGURES

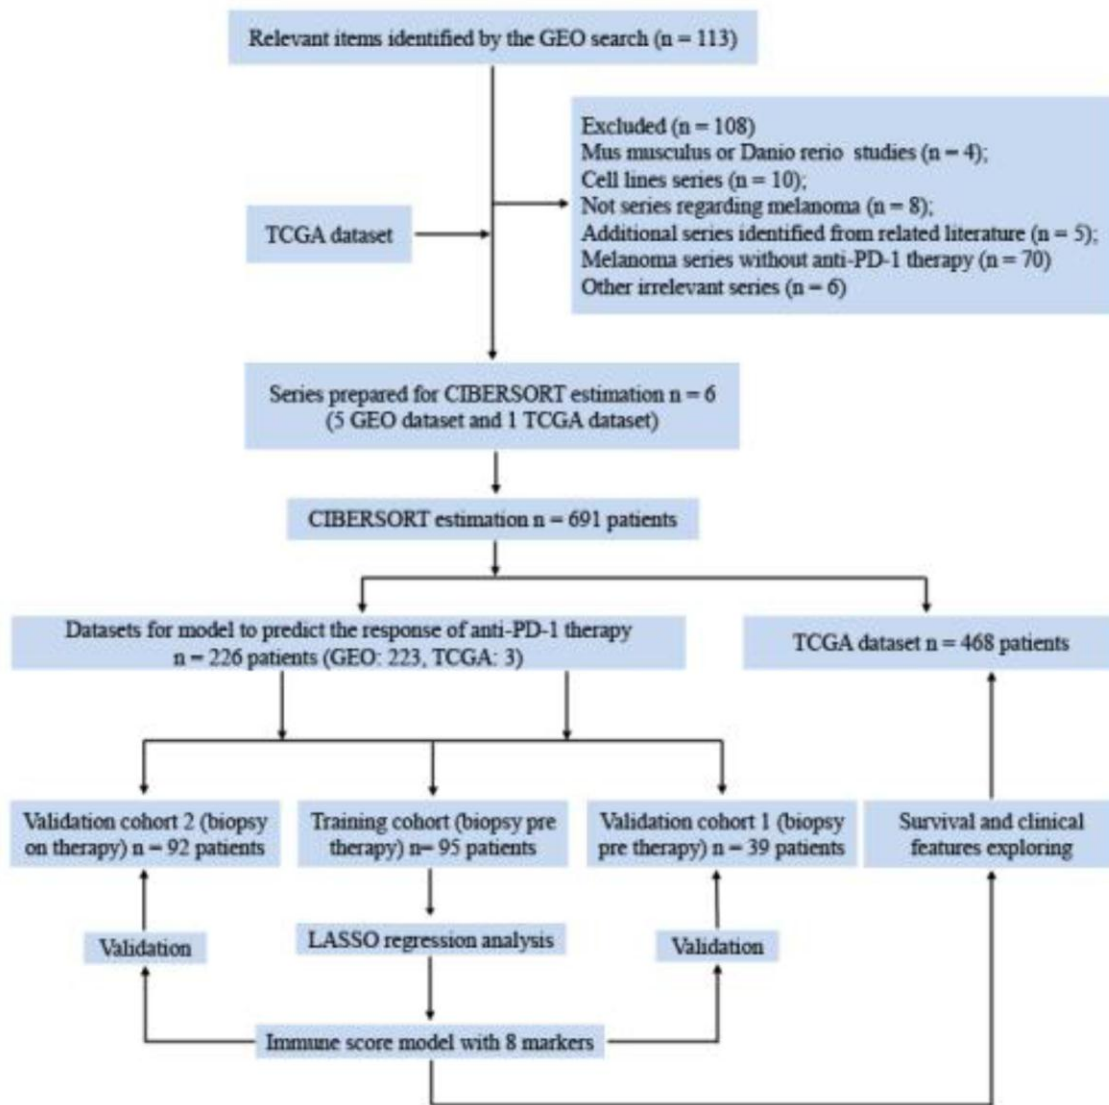

**Supplementary Figure 1. CONSORT diagram.** A total of 691 patients were enrolled in the analysis. GEO, Gene Expression Omnibus; TCGA, The Cancer Genome Atlas; CIBERSORT, Cell type Identification by Estimating Relative Subsets of RNA Transcripts; LASSO, least absolute shrinkage and selection operator; PD1, programmed death 1.

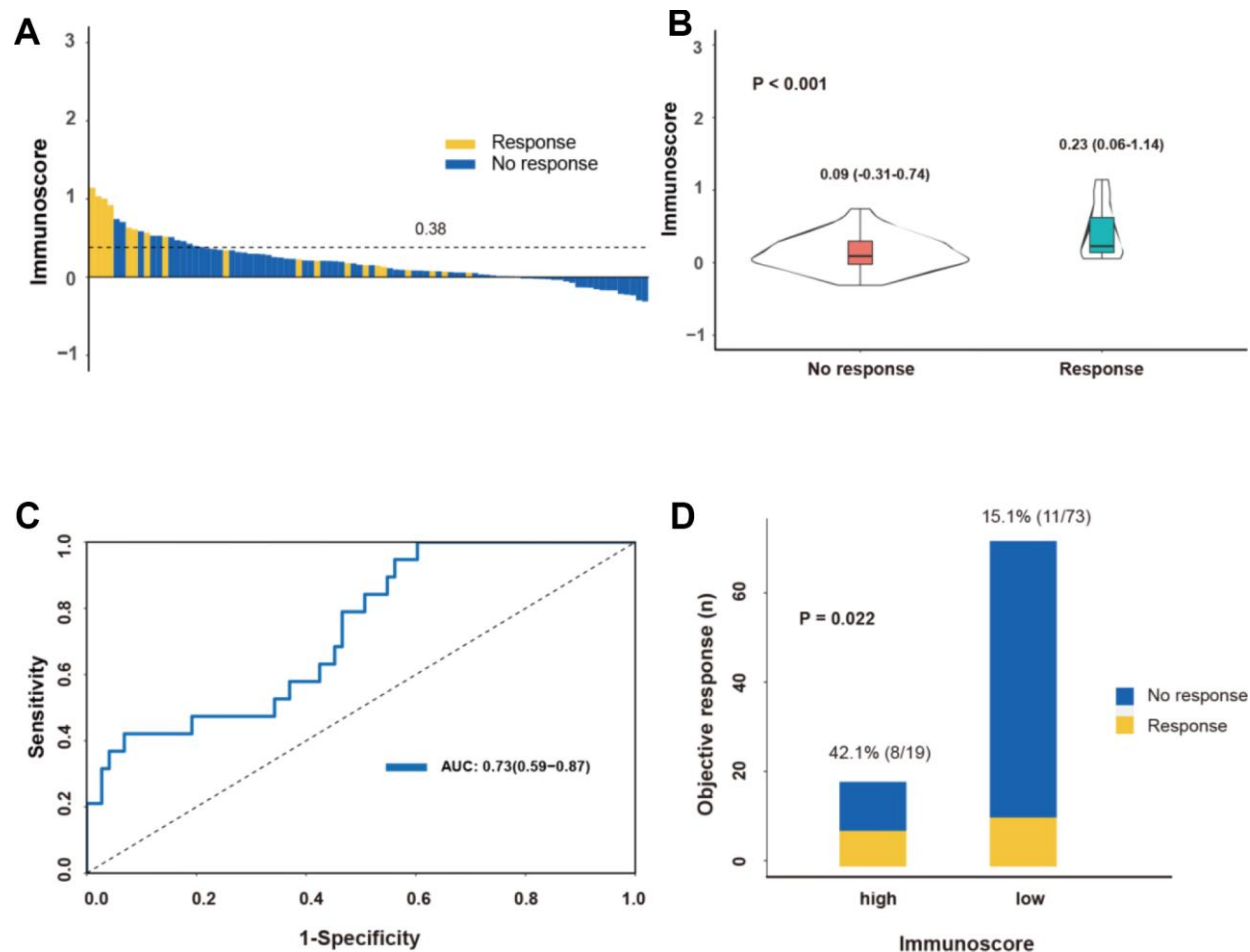

**Supplementary Figure 2. Distribution of the immunoscore and response to anti-PD-1 therapy in the on-anti-PD-1 cohort.** (A) Waterfall plots for distribution of the immunoscore and response status of individual patients. (B) Distribution of immunoscore in responders and nonresponders. The box plots inside the violin indicate the median value and interquartile range of immunoscore. We calculated the P-value with ANOVA test. (C) Receiver operating characteristic (ROC) curves of the immunoscore. The area under the ROC curve was 0.73. (D) Objective response rate between high- and low-immunoscore groups across the on-anti-PD-1 melanoma dataset. “On” indicates the biopsy during anti-PD-1 therapy. We calculated the P-value with the  $\chi^2$  test.
