# Supplementary material for: Robust immunoscore model to predict the response to anti-PD1 therapy in melanoma
Source: publisher site journal article supplement (doi:10.18632/aging.102556), 2019-12-03
Supplement: Supplementary file [file aging-v11i23-102556-supplementary-material-SD1.pdf]

## Supplementary Appendix. GEO search terms (n = 113)

(Melanoma [Title]) AND "Homo sapiens"[porgn:\_txid9606] AND ( ( "Expression profiling by high throughput sequencing"[Filter] OR "Expression profiling by array"[Filter] ) AND "attribute name tissue"[Filter]).
