# Supplementary material for: Robust immunoscore model to predict the response to anti-PD1 therapy in melanoma
Source: Aging (Albany NY). 2019 Dec 3;11(23):11576–90. doi: 10.18632/aging.102556 (PMC6932919; doi:10.18632/aging.102556)
Supplement: Supplementary Table 2 [file aging-11-102556-s003..xlsx]

## Sheet: clinicopathological feature
Supplementary Table 2. Clinicopathological feature of the patients of the included series and immune gene list.
sampleID	response	biopoint	pd1	series	os_time	os_status	pfs_time	pfs_status	gender	age	stage	stage1	race	histological_type	new_tumor_event_type	new_tumor_event_site	new_tumor_event_site_other	new_tumor_event_dx_days_to	treatment_outcome_first_course	PFI	PFI_time	Immune_Subtype	Leukocyte_Fraction	Stromal_Fraction	Intratumor_Heterogeneity	TIL_Regiol_Fraction	Proliferation	Wound_Healing	Macrophage_Regulation	Lymphocyte_Infiltration_Sigture_Score	IFN_gamma_Response	TGF_beta_Response	Th1_Cells	Th2_Cells	Th17_Cells	MUTATIONSUBTYPES	ALL_PRIMARY_VS_METASTATIC	REGIOL_VS_PRIMARY	UV_sigture	RSEQ_CLUSTER_CONSENHIER	MethTypes_201408	MIRCluster	ProteinCluster	OncoSignCluster	immuno	B_cells_ive	B_cells_memory	Plasma_cells	T_cells_CD8
GSM2420259	NR	Pre	1	GSE91061	160	1					IV	IV																																	1	0.0282395	0.00852605	0	0.203221
GSM2420260	NR	On	1	GSE91061	160	1					IV	IV																																	1	0	0.0149601	0.0106034	0.201245
GSM2420261	NR	Pre	1	GSE91061	275	1					IV	IV																																	1	0.0125606	0	0	0.161414
GSM2420262	NR	On	1	GSE91061	275	1					IV	IV																																	1	0.00244896	0	0	0.195678
GSM2420263	NR	On	1	GSE91061	52	1					IV	IV																																	1	0.0214452	0	0.00787266	0.454512
GSM2420264	NR	Pre	1	GSE91061	52	1					IV	IV																																	1	0.0278374	0	0.011449	0.240731
GSM2420265	NR	Pre	1	GSE91061	166	1					IV	IV																																	1	0	0.0431632	0.00840036	0.0105825
GSM2420266	NR	On	1	GSE91061	499	1					IV	IV																																	1	0.00795643	0.0111079	0.016224	0.3267
GSM2420267	NR	Pre	1	GSE91061	708	1					IV	IV																																	1	0.00179332	0.023903	0.014079	0.228324
GSM2420268	NR	Pre	1	GSE91061	429	1					IV	IV																																	1	0.0006	0.00986139	0.046134	0.236035
GSM2420269	NR	On	1	GSE91061	429	1					IV	IV																																	1	0	0.0283761	0.0196122	0.267575
GSM2420270	R	Pre	1	GSE91061	827	0					IV	IV																																	1	0.0216204	0.0222688	0.045759	0.282481
GSM2420271	R	On	1	GSE91061	827	0					IV	IV																																	1	0.0386149	0	0.00590614	0.470174
GSM2420272	NR	Pre	1	GSE91061	542	1					IV	IV																																	1	0	0.036854	0.0142877	0.151782
GSM2420273	NR	Pre	1	GSE91061	10	1					IV	IV																																	1	0	0	0.00299204	0.0344567
GSM2420274	NR	On	1	GSE91061							IV	IV																																	1	0.00175569	0	0.00441214	0.479052
GSM2420275	NR	Pre	1	GSE91061	904	0					IV	IV																																	1	0.00193165	0.0125607	0	0.0169407
GSM2420276	NR	On	1	GSE91061	904	0					IV	IV																																	1	0.0211798	0.157091	0.0154023	0.127722
GSM2420277	NR	Pre	1	GSE91061	844	1					IV	IV																																	1	0	0.0220004	0.0404552	0.0711239
GSM2420278	NR	On	1	GSE91061	844	1					IV	IV																																	1	0.013185	0	0.00538156	0.208637
GSM2420279	NR	On	1	GSE91061	849	0					IV	IV																																	1	0.018094	0	0.00523717	0.149162
GSM2420280	R	Pre	1	GSE91061	834	0					IV	IV																																	1	0.305017	0.16826	0	0.176633
GSM2420281	R	On	1	GSE91061	834	0					IV	IV																																	1	0.344653	0.102108	0	0.181045
GSM2420282	NR	Pre	1	GSE91061	718	1					IV	IV																																	1	0	0.0193017	0.00906681	0.0705903
GSM2420283	NR	On	1	GSE91061	718	1					IV	IV																																	1	0	0.0186865	0.00497373	0.142725
GSM2420284	NR	On	1	GSE91061	476	1					IV	IV																																	1	0	0.0104704	0.0555453	0.161716
GSM2420285	NR	Pre	1	GSE91061	476	1					IV	IV																																	1	0	0.025094	0.0331973	0.124368
GSM2420286	NR	Pre	1	GSE91061	1032	0					IV	IV																																	1	0.125589	0	0.10527	0.364481
GSM2420287	NR	On	1	GSE91061	1032	0					IV	IV																																	1	0.109335	0	0.15856	0.294619
GSM2420288	R	On	1	GSE91061	981	0					IV	IV																																	1	0	0	0.00569912	0.196339
GSM2420289	R	Pre	1	GSE91061	981	0					IV	IV																																	1	0.0355814	0.0836603	0	0.228681
GSM2420290	R	On	1	GSE91061							IV	IV																																	1	0.0241603	0	0.017232	0.345325
GSM2420291	NR	On	1	GSE91061	913	0					IV	IV																																	1	0	0.047768	0.0138167	0.0544169
GSM2420292	NR	Pre	1	GSE91061	471	1					IV	IV																																	1	0.160526	0.192041	0	0.209468
GSM2420293	NR	On	1	GSE91061	471	1					IV	IV																																	1	0.207092	0.086208	0	0.217774
GSM2420294	NR	On	1	GSE91061	218	1					IV	IV																																	1	0.0044894	0.00370598	0.0454965	0.327538
GSM2420295	NR	Pre	1	GSE91061	218	1					IV	IV																																	1	0	0	0.0782842	0.319726
GSM2420296	NR	Pre	1	GSE91061	151	1					IV	IV																																	1	0	0.0777781	0.0868121	0.0557517
GSM2420297	NR	On	1	GSE91061	151	1					IV	IV																																	1	0	0.106302	0.0557345	0.0322357
GSM2420298	NR	On	1	GSE91061	974	0					IV	IV																																	1	0.0464347	0	0.00317918	0.312196
GSM2420299	NR	Pre	1	GSE91061	747	1					IV	IV																																	1	0.0270627	0	0.0880917	0.1177
GSM2420300	NR	On	1	GSE91061	747	1					IV	IV																																	1	0.0308435	0	0.0551843	0.209528
GSM2420301	NR	On	1	GSE91061	472	1					IV	IV																																	1	0.0398009	0	0.00532027	0.14453
GSM2420302	NR	Pre	1	GSE91061	472	1					IV	IV																																	1	0	0.00452602	0.0675872	0.162182
GSM2420303	NR	Pre	1	GSE91061	692	0					IV	IV																																	1	0.025874	0.0597495	0.00995677	0.197911
GSM2420304	NR	On	1	GSE91061	692	0					IV	IV																																	1	0	0.0261579	0.0608581	0.256832
GSM2420305	R	On	1	GSE91061	842	0					IV	IV																																	1	0.187783	0	0.0156833	0.145184
GSM2420306	R	On	1	GSE91061							IV	IV																																	1	0.024792	0.00667689	0.00102111	0.385404
GSM2420307	R	Pre	1	GSE91061	770	1					IV	IV																																	1	0	0.0755829	0	0.0128013
GSM2420308	NR	On	1	GSE91061	78	1					IV	IV																																	1	0	0.0170905	0.00481889	0.115278
GSM2420310	NR	Pre	1	GSE91061	78	1					IV	IV																																	1	0	0.0336916	0.0602099	0.0442849
GSM2420311	NR	On	1	GSE91061							IV	IV																																	1	0.0517924	0	0.0251627	0.25438
GSM2420312	NR	Pre	1	GSE91061	174	1					IV	IV																																	1	0.0291863	0	0.00622076	0.216568
GSM2420313	NR	Pre	1	GSE91061	333	1					IV	IV																																	1	0.0147871	0	0.015476	0.317673
GSM2420316	NR	On	1	GSE91061	333	1					IV	IV																																	1	0.0322174	0	0	0.422292
GSM2420317	NR	On	1	GSE91061	484	0					IV	IV																																	1	0	0.0492368	0.0100338	0.100199
GSM2420318	NR	Pre	1	GSE91061	484	0					IV	IV																																	1	0.0204404	0.0570951	0	0.240773
GSM2420319	NR	On	1	GSE91061							IV	IV																																	1	0.0341642	0	0.017107	0.375953
GSM2420320	NR	On	1	GSE91061							IV	IV																																	1	0.0341642	0	0.017107	0.375953
GSM2420323	R	On	1	GSE91061	1144	0					IV	IV																																	1	0.00932402	0.0363075	0.00261916	0.211807
GSM2420324	R	Pre	1	GSE91061	1144	0					IV	IV																																	1	0	0.00646417	0.0009	0.0436728
GSM2420325	NR	On	1	GSE91061	633	1					IV	IV																																	1	0.0455187	0	0.0164063	0.301558
GSM2420326	NR	Pre	1	GSE91061	633	1					IV	IV																																	1	0.0257701	0.0182717	0.012041	0.310718
GSM2420328	NR	On	1	GSE91061	222	1					IV	IV																																	1	0.0090138	0	0	0.241937
GSM2420329	NR	Pre	1	GSE91061	222	1					IV	IV																																	1	0.0235373	0.0110092	0	0.302161
GSM2420331	NR	Pre	1	GSE91061	92	1					IV	IV																																	1	0	0.0110755	0.0238173	0.0390385
GSM2420332	NR	On	1	GSE91061	92	1					IV	IV																																	1	0	0.0125108	0.00727187	0.0883223
GSM2420333	NR	Pre	1	GSE91061	256	1					IV	IV																																	1	0.00803006	0.147254	0.0487807	0.0404297
GSM2420334	NR	On	1	GSE91061	256	1					IV	IV																																	1	0.0168578	0	0	0.103042
GSM2420335	NR	On	1	GSE91061	57	1					IV	IV																																	1	0	0	0.095135	0.0138951
GSM2420336	NR	Pre	1	GSE91061	57	1					IV	IV																																	1	0	0.0217864	0.0591633	0.0660884
GSM2420337	R	Pre	1	GSE91061	1073	0					IV	IV																																	1	0.261319	0.0750731	0	0.181223
GSM2420338	R	On	1	GSE91061	1073	0					IV	IV																																	1	0.238669	0.0837629	0	0.298992
GSM2420339	NR	On	1	GSE91061	114	0					IV	IV																																	1	0	0.0235905	0.00284514	0
GSM2420340	NR	On	1	GSE91061	167	1					IV	IV																																	1	0	0.0212823	0.0414108	0.113391
GSM2420341	NR	Pre	1	GSE91061	167	1					IV	IV																																	1	0	0.00969889	0.087712	0.104198
GSM2420342	R	On	1	GSE91061	1046	0					IV	IV																																	1	0.0556139	0.0381283	0.0161477	0.177934
GSM2420343	R	Pre	1	GSE91061	1046	0					IV	IV																																	1	0.0267065	0	0.0290736	0.215027
GSM2420344	NR	Pre	1	GSE91061	1081	0					IV	IV																																	1	0.00390294	0.00323074	0	0.0221526
GSM2420345	NR	On	1	GSE91061	1081	0					IV	IV																																	1	0.0309477	0.00792046	0.00653756	0.0917876
GSM2420346	NR	Pre	1	GSE91061	646	1					IV	IV																																	1	0.0106905	0.00929876	0.0462839	0.192701
GSM2420349	NR	On	1	GSE91061	646	1					IV	IV																																	1	0	0.0788153	0	0.0448431
GSM2420350	NR	Pre	1	GSE91061	227	1					IV	IV																																	1	0.0171964	0.00802785	0.0006	0.0997802
GSM2420351	NR	On	1	GSE91061	227	1					IV	IV																																	1	0	0.0356905	0	0.069626
GSM2420352	NR	Pre	1	GSE91061	149	0					IV	IV																																	1	0.0222496	0.0453803	0	0.0333745
GSM2420353	NR	On	1	GSE91061	475	1					IV	IV																																	1	0	0.0307081	0.0373403	0.18483
GSM2420354	NR	Pre	1	GSE91061	475	1					IV	IV																																	1	0.0142721	0.0119269	0.0846529	0.0572636
GSM2420355	NR	Pre	1	GSE91061	273	1					IV	IV																																	1	0.0282992	0	0.123658	0.0321452
GSM2420356	R	On	1	GSE91061	1053	0					IV	IV																																	1	0.0131371	0.0004	0	0.38829
GSM2420357	R	Pre	1	GSE91061	1053	0					IV	IV																																	1	0.0292827	0.0245524	0.0659888	0.172674
GSM2420358	NR	On	1	GSE91061	961	0					IV	IV																																	1	0.0347785	0	0.0240493	0.235885
GSM2420359	NR	Pre	1	GSE91061	961	0					IV	IV																																	1	0.00485815	0.0422162	0.0531126	0.230423
GSM2420360	NR	Pre	1	GSE91061	259	1					IV	IV																																	1	0.0170824	0.053801	0.0191225	0.15727
GSM2420361	NR	On	1	GSE91061	259	1					IV	IV																																	1	0.00599501	0.00658998	0	0.238801
GSM2420362	NR	Pre	1	GSE91061	837	1					IV	IV																																	1	0.0002	0	0	0.280841
GSM2420363	NR	On	1	GSE91061	837	1					IV	IV																																	1	0.0019259	0	0.0149116	0.255652
GSM2420364	NR	On	1	GSE91061	280	1					IV	IV																																	1	0	0.00836644	0.00953263	0.372161
GSM2420365	NR	On	1	GSE91061							IV	IV																																	1	0.00276039	0.0150744	0	0.0307148
GSM2420366	NR	Pre	1	GSE91061	952	0					IV	IV																																	1	0.102194	0	0.0246992	0.197466
GSM2420367	NR	On	1	GSE91061	952	0					IV	IV																																	1	0	0.0360362	0.0133185	0.0284769
GSM2420368	NR	Pre	1	GSE91061	740	1					IV	IV																																	1	0.0537143	0.0255323	0.0949599	0.117798
GSM2420369	NR	On	1	GSE91061	740	1					IV	IV																																	1	0	0.0298113	0.0123121	0.373802
GSM2420370	R	Pre	1	GSE91061	1093	0					IV	IV																																	1	0.00197135	0.00804523	0.0181557	0.383609
GSM2420371	R	On	1	GSE91061	1093	0					IV	IV																																	1	0.00741978	0.0189328	0	0.417654
GSM2420372	NR	Pre	1	GSE91061	91	1					IV	IV																																	1	0	0.00812108	0.0130874	0.197665
GSM2420373	NR	On	1	GSE91061	91	1					IV	IV																																	1	0.0269938	0	0	0.120547
GSM2420374	R	On	1	GSE91061	834	0					IV	IV																																	1	0.0182177	0	0.00531376	0.301527
GSM2420375	R	Pre	1	GSE91061	834	0					IV	IV																																	1	0.0247254	0	0.0003	0.269999
GSM2420376	R	On	1	GSE91061							IV	IV																																	1	0.0160269	0	0.00141795	0.429108
GSM2069823	NR	Pre	1	GSE78220	607	1			Female	66	IV	IV																																	1	0.0402906	0	0	0.113444
GSM2069824	R	Pre	1	GSE78220	927	0			Male	55	IV	IV																																	1	0.0125889	0	0	0.0917544
GSM2069825	R	Pre	1	GSE78220	948	0			Male	62	IV	IV																																	1	0.0204539	0	0.0105191	0.129753
GSM2069826	R	Pre	1	GSE78220	439	0			Male	61	IV	IV																																	1	0.00533411	0.00102481	0	0
GSM2069827	R	Pre	1	GSE78220	882	0			Male	51	IV	IV																																	1	0	0.00134339	0.00132277	0.0452345
GSM2069828	NR	Pre	1	GSE78220	662	1			Female	55	IV	IV																																	1	0.0684146	0	0.0102442	0.139929
GSM2069829	R	Pre	1	GSE78220		0			Male	69	IV	IV																																	1	0	0.00386738	0.00345091	0.148993
GSM2069830	R	Pre	1	GSE78220	1054	0			Male	68	IV	IV																																	1	0.0275122	0	0.0007	0.214805
GSM2069831	NR	Pre	1	GSE78220	387	0			Male	60	IV	IV																																	1	0.0015773	0.00679376	0	0
GSM2069832	NR	Pre	1	GSE78220	327	1			Male	59	IV	IV																																	1	0	0.00341103	0	0.0103074
GSM2069833	R	Pre	1	GSE78220	917	0			Female	53	IV	IV																																	1	0	0.0178127	0	0.208238
GSM2069834	NR	Pre	1	GSE78220	54	0			Female	27	IV	IV																																	1	0	0	0.00177406	0.0632286
GSM2069835	R	Pre	1	GSE78220	980	1			Male	70	IV	IV																																	1	0.0301863	0.0165922	0.0117319	0.222451
GSM2069836	NR	Pre	1	GSE78220	186	1			Male	19	IV	IV																																	1	0.0125969	0	0.00343829	0.0153661
GSM2069837	R	Pre	1	GSE78220	1060	0			Male	45	IV	IV																																	1	0.0351051	0	0.0005	0.139655
GSM2069838	NR	Pre	1	GSE78220	337	1			Female	63	IV	IV																																	1	0.0147918	0	0.00683609	0.419775
GSM2069839	NR	Pre	1	GSE78220	182	1			Male	55	IV	IV																																	1	0.0194889	0	0.0463636	0.147224
GSM2069840	NR	Pre	1	GSE78220	103	1			Male	63	IV	IV																																	1	0.00674292	0	0	0.153979
GSM2069841	NR	Pre	1	GSE78220	262	1			Male	74	IV	IV																																	1	0.00943319	0	0.00534119	0.350562
GSM2069842	R	Pre	1	GSE78220	548	0			Male	83	IV	IV																																	1	0.035834	0	0	0.179967
GSM2069843	R	Pre	1	GSE78220	548	0			Male	83	IV	IV																																	1	0.0124895	0	0	0.142247
GSM2069844	R	Pre	1	GSE78220	439	1			Male	82	IV	IV																																	1	0.0263246	0	0.012493	0.0227195
GSM2069845	NR	Pre	1	GSE78220	269	1			Male	84	IV	IV																																	1	0.0384856	0	0.0156417	0.233325
GSM2069846	NR	Pre	1	GSE78220	704	0			Male	47	IV	IV																																	1	0.00336363	0	0	0.134849
GSM2069847	NR	Pre	1	GSE78220	171	1			Male	47	IV	IV																																	1	0.00349237	0	0	0.197286
GSM2069848	R	Pre	1	GSE78220	427	0			Female	65	IV	IV																																	1	0.0126093	0	0	0.31565
GSM2069849	R	Pre	1	GSE78220	364	0			Female	70	IV	IV																																	1	0	0	0.00962333	0.389481
GSM2069850	R	Pre	1	GSE78220	448	0			Female	57	IV	IV																																	1	0.162802	0.294251	0	0.113764
GSM2445716	NR	Pre	1	GSE93157			55	1	Female	68	IV	IV																																	1	0.103753	0	0	0
GSM2445717	NR	Pre	1	GSE93157			34	1	Male	59	IV	IV																																	1	0.112396	0.14306	0.0342246	0.0209436
GSM2445718	NR	Pre	1	GSE93157			76	1	Male	70	IV	IV																																	1	0.0898612	0	0.0742902	0.0301465
GSM2445719	NR	Pre	1	GSE93157			119	1	Female	83	IV	IV																																	1	0.0231362	0	0.0500582	0
GSM2445720	NR	Pre	1	GSE93157			77	1	Male	80	IV	IV																																	1	0.0659299	0.0835427	0.157524	0.0362719
GSM2445721	NR	Pre	1	GSE93157			95	1	Male	50	IV	IV																																	1	0.166274	0	0.0417242	0.135465
GSM2445722	NR	Pre	1	GSE93157			77	1	Male	64	IV	IV																																	1	0.133062	0	0.0569546	0.0333959
GSM2445723	NR	Pre	1	GSE93157			63	1	Male	58	IV	IV																																	1	0.022086	0	0.0409574	0.0995783
GSM2445724	NR	Pre	1	GSE93157			78.9	1	Female	61	IV	IV																																	1	0.256028	0	0.0702077	0.0611584
GSM2445725	NR	Pre	1	GSE93157			44	1	Male	48	IV	IV																																	1	0.0621754	0	0	0
GSM2445726	NR	Pre	1	GSE93157			189	0	Male	47	IV	IV																																	1	0.124083	0	0.0178103	0
GSM2445727	R	Pre	1	GSE93157			629	0	Male	43	IV	IV																																	1	0.0552568	0	0	0.0719505
GSM2445728	R	Pre	1	GSE93157			219	1	Male	43	IV	IV																																	1	0.0153337	0	0.00204855	0.0398844
GSM2445729	R	Pre	1	GSE93157			492	0	Male	47	IV	IV																																	1	0.18052	0.088566	0	0.0515555
GSM2445730	R	Pre	1	GSE93157			195	1	Male	74	IV	IV																																	1	0.129556	0	0	0
GSM2445731	R	Pre	1	GSE93157			251	0	Male	54	IV	IV																																	1	0.0525733	0	0.018916	0.213238
GSM2445732	R	Pre	1	GSE93157			77	1	Female	68	IV	IV																																	1	0.1661	0	0.110101	0
GSM2445733	R	Pre	1	GSE93157			966	0	Male	79	IV	IV																																	1	0.048131	0	0.0229243	0.0943535
GSM2445734	NR	Pre	1	GSE93157			78	1	Female	76	IV	IV																																	1	0.0798323	0	0.225243	0.0322411
GSM2445735	NR	Pre	1	GSE93157			72	1	Male	59	IV	IV																																	1	0.220251	0	0.0310795	0.0421268
GSM2445736	NR	Pre	1	GSE93157			51	1	Male	55	IV	IV																																	1	0.151576	0.376261	0	0.0123381
GSM2445737	R	Pre	1	GSE93157			673	0	Male	41	IV	IV																																	1	0.0968386	0	0	0.00675245
GSM2445738	NR	Pre	1	GSE93157			133	1	Male	40	IV	IV																																	1	0.0239641	0	0	0
GSM2445739	NR	Pre	1	GSE93157			95	1	Female	62	IV	IV																																	1	0.122933	0	0.00284113	0
GSM2445740	R	Pre	1	GSE93157			672	0	Female	47	IV	IV																																	1	0.482619	0	0.0381548	0.0391089
GSM3190464	NR	Pre	1	GSE115821						67	IV	IV																																	1	0.0521705	0	0	0.546828
GSM3190465	NR	On	1	GSE115821						67	IV	IV																																	1	0.0140235	0	0	0.66307
GSM3190466	R	Pre	1	GSE115821						81	IV	IV																																	1	0	0.0539654	0	0.0180705
GSM3190467	NR	On	1	GSE115821						84	IV	IV																																	1	0.0335486	0	0	0.420889
GSM3190468	NR	Pre	1	GSE115821						84	IV	IV																																	1	0.00380144	0	0	0.37563
GSM3190469	NR	On	1	GSE115821						84	IV	IV																																	1	0.0229651	0	0	0.237748
GSM3190470	NR	Pre	1	GSE115821						84	IV	IV																																	1	0	0	0.0001	0.00961526
GSM3190471	NR	On	1	GSE115821						48	IV	IV																																	1	0.0139085	0	0	0.485072
GSM3190472	NR	Pre	1	GSE115821						48	IV	IV																																	1	0.00759524	0	0	0.442565
GSM3190473	NR	On	1	GSE115821						46	IV	IV																																	1	0.02594	0	0	0.279463
GSM3190474	NR	Pre	1	GSE115821						46	IV	IV																																	1	0.00477669	0	0	0.127223
GSM3190475	NR	On	1	GSE115821						46	IV	IV																																	1	0.0167892	0	0	0.0966302
GSM3190476	NR	Pre	1	GSE115821						72	IV	IV																																	1	0.0060016	0	0	0.0707506
GSM3190477	NR	On	1	GSE115821						72	IV	IV																																	1	0.0151	0	0.00488838	0.312571
GSM3190478	NR	On	1	GSE115821						72	IV	IV																																	1	0.0152086	0	0	0.200211
GSM3190479	R	Pre	1	GSE115821						28	IV	IV																																	1	0.0381244	0	0	0.353935
GSM3190480	R	On	1	GSE115821						28	IV	IV																																	1	0.318427	0	0	0.324853
GSM3190481	NR	Pre	1	GSE115821						76	IV	IV																																	1	0.00339002	0	0.001	0.00493907
GSM3190482	NR	On	1	GSE115821						77	IV	IV																																	1	0.0470958	0	0	0.210077
GSM3190483	NR	On	1	GSE115821						77	IV	IV																																	1	0.00115911	0	0.00162755	0.0317793
GSM3190484	NR	Pre	1	GSE115821						84	IV	IV																																	1	0	0.0101344	0	0.325063
GSM3190485	NR	Pre	1	GSE115821						84	IV	IV																																	1	0	0.0755976	0	0.127297
GSM3190486	NR	On	1	GSE115821						84	IV	IV																																	1	0.0119701	0	0	0.467801
GSM3190487	NR	Pre	1	GSE115821						46	IV	IV																																	1	0.00909752	0	0	0.271327
GSM3190488	NR	On	1	GSE115821						46	IV	IV																																	1	0.0499286	0	0	0.1856
GSM3190489	NR	On	1	GSE115821						46	IV	IV																																	1	0.040093	0	0	0.317463
GSM3190490	NR	On	1	GSE115821						46	IV	IV																																	1	0.0591646	0	0	0.454455
GSM3190491	NR	On	1	GSE115821						46	IV	IV																																	1	0.00803494	0	0	0.278449
GSM3190492	NR	On	1	GSE115821						46	IV	IV																																	1	0.0431104	0	0	0.490244
GSM3190493	NR	On	1	GSE115821						46	IV	IV																																	1	0.0269895	0	0	0.476972
GSM3190494	NR	Pre	1	GSE115821						72	IV	IV																																	1	0.0152102	0	0	0.281095
GSM3190495	NR	Pre	1	GSE115821						72	IV	IV																																	1	0.02058	0	0	0.272086
GSM3190496	NR	On	1	GSE115821						72	IV	IV																																	1	0.014163	0	0	0.445548
GSM3190497	NR	On	1	GSE115821						72	IV	IV																																	1	0	0	0	0.336711
GSM3190498	NR	On	1	GSE115821						72	IV	IV																																	1	0	0	0	0.367928
GSM3190499	NR	On	1	GSE115821						72	IV	IV																																	1	0	0	0	0.355598
GSM3190500	NR	On	1	GSE115821						72	IV	IV																																	1	0.0008	0	0	0.412103
GSM3510215	NR	On	1	GSE123728					Male	65	IIIC	III																																	1	0.0501854	0.0438535	0.118353	0.0593409
GSM3510216	NR	Pre	1	GSE123728					Male	39	IIIB	III																																	1	0	0.0284389	0.0918751	0.174276
GSM3510217	R	Pre	1	GSE123728					Male	28	IIIB	III																																	1	0.0738452	0.0554138	0.151228	0.0716558
GSM3510218	R	On	1	GSE123728					Male	54	IIIC	III																																	1	0.174652	0.0774631	0.0698181	0.0245126
GSM3510219	NR	Pre	1	GSE123728					Male	85	IIIC	III																																	1	0.0525376	0	0.070991	0.110404
GSM3510220	R	On	1	GSE123728					Female	56	IIIC	III																																	1	0.0921941	0	0.0716682	0.200242
GSM3510221	NR	Pre	1	GSE123728					Male	68	IIIC	III																																	1	0.00961755	0	0.109954	0.11151
GSM3510222	R	Pre	1	GSE123728					Female	63	IIIC	III																																	1	0	0.0611121	0	0.0362459
GSM3510223	R	On	1	GSE123728					Female	63	IIIC	III																																	1	0.0818	0	0.0249922	0.193702
GSM3510224	NR	On	1	GSE123728					Male	85	IIIC	III																																	1	0.0699258	0	0.0678985	0.304855
GSM3510225	NR	Pre	1	GSE123728					Female	61	IIIC	III																																	1	0	0.0710706	0.0448788	0
GSM3510226	NR	Pre	1	GSE123728					Male	67	IIIB	III																																	1	0.0328834	0.0498242	0.0661839	0.109991
GSM3510227	R	On	1	GSE123728					Female	63	IIIC	III																																	1	0.279858	0	0.0706087	0
GSM3510228	NR	On	1	GSE123728					Female	61	IIIC	III																																	1	0.0857998	0.00934613	0.12058	0.190709
GSM3510229	NR	On	1	GSE123728					Male	67	IIIB	III																																	1	0.10795	0.0740659	0.0847283	0.175612
GSM3510230	R	Pre	1	GSE123728					Male	54	IIIC	III																																	1	0.0187378	0	0	0
GSM3510231	NR	On	1	GSE123728					Male	68	IIIC	III																																	1	0.0593881	0.0055355	0.137488	0.117217
GSM3510232	R	On	1	GSE123728					Male	28	IIIB	III																																	1	0	0.0227702	0.0875553	0.0375151
GSM3510233	NR	Pre	1	GSE123728					Female	64	IIIB	III																																	1	0.0438533	0.00825266	0.253525	0.139625
GSM3510234	R	Pre	1	GSE123728					Female	56	IIIC	III																																	1	0.0535311	0	0.169305	0.0900187
GSM3510235	NR	Pre	1	GSE123728					Male	65	IIIC	III																																	1	0	0.132905	0.186381	0.0647625
GSM3510236	R	Pre	1	GSE123728					Female	63	IIIC	III																																	1	0	0.281001	0.0733461	0.0387253
GSM3510237	NR	Pre	1	GSE123728					Male	81	IIIC	III																																	1	0.0344154	0	0.211268	0.117454
GSM3510238	NR	On	1	GSE123728					Male	39	IIIB	III																																	1	0.112341	0	0.102214	0.215096
TCGA-3N-A9WB		Pre	0	TCGA	518	1			Male	60	Stage IA	I/II	WHITE		Locoregiol Recurrence	Other, Specify	Axillary	426	[Not Available]	1	1961		0.0547145	0.09	0	0.51247	0.7274	0.292	-1.4231	-2.4644	-0.1908	-0.3096	-1255.91	1123.27	-3652.82										0	0	0.125948	0	0
TCGA-3N-A9WC		Pre	0	TCGA	2022	0			Male	71	Stage IIA	Not Available	WHITE		Distant Metastasis	Lung		1705	[Not Available]	1	711		0.395689	0.42	0.12		-0.0123	-0.0035	0.9182	1.9708	1.1083	-0.1278	988.336	-424.94	-2192.23										0	0.0397044	0	0.00511165	0.433856
TCGA-3N-A9WD		Pre	0	TCGA	395	1			Male	71	Stage IIIA	III	WHITE		Distant Metastasis	Brain		306	[Not Available]	1	1577		0.354293	0.55	0.23	8.83331	0.0598	0.0445	0.4076	1.9169	0.346	0.0457	-340.25	-373.574	1454.96										0	0.0961639	0.0381327	0.0890893	0.227332
TCGA-BF-A1PU		Pre	0	TCGA	387	0			Female	35	Stage IIC	I/II	WHITE		Distant Metastasis	Lung		484	[Not Available]	1	2077	C1	0.0729015	0.08	0.03		0.1199	-0.05	-1.4077	-2.2016	-1.6979	0.2661	-1368.55	1014.95	-2119.08	BRAF_Hotspot_Mutants	All_Primaries	-	UV sigture	keratin	normal-like	MIR.type.3	PROT.type.1	OSC.6	0	0.0760769	0	0	0.112882
TCGA-BF-A1PV		Pre	0	TCGA	14	0			Female	63	Stage IIC	I/II	WHITE						[Not Available]	0	422	C1	0.072309	0.08	0.03		0.4448	0.1065	-1.3462	-1.871	-0.8773	0.0167	-944.928	876.627	-2396.15	RAS_Hotspot_Mutants	All_Primaries	Primary_Disease	UV sigture	keratin	CpG island-methylated	MIR.type.2	-	OSC.2	0	0.0566361	0	0.0061966	0.0334288
TCGA-BF-A1PX		Pre	0	TCGA	282	1			Male	45	Stage IIIB	III	WHITE						[Not Available]	0	1467	C2	0.538046	0.75	0.06		0.3343	0.1005	0.8836	1.7737	0.8158	0.5997	613.656	758.09	-2127.88	BRAF_Hotspot_Mutants	All_Primaries	-	UV sigture	keratin	normal-like	MIR.type.1	PROT.type.1	OSC.4	0	0.05502	0	0.0320049	0.348789
TCGA-BF-A1PZ		Pre	0	TCGA	853	0			Female	60	Stage IIB	I/II	WHITE						[Not Available]	0	2548	C2	0.11909	0.1	0.16		0.238	0.114	-0.612	-0.7079	0.8755	-0.1944	-602.993	71.8558	-928.592	RAS_Hotspot_Mutants	All_Primaries	-	UV sigture	keratin	hypo-methylated	MIR.type.2	PROT.type.2	OSC.2	0	0	0.0421736	0	0.247735
TCGA-BF-A1Q0		Pre	0	TCGA	831	0			Male	69	Stage IIC	I/II	WHITE						[Not Available]	0	2523	C1	0.31847	0.6	0.33		1.0546	0.373	0.0017	0.3759	0.0528	0.2309	272.472	926.719	-2578.08	Triple_WT	All_Primaries	Primary_Disease	not UV	immune	CpG island-methylated	MIR.type.2	-	OSC.2	0	0.0382499	0	0.0008	0.134762
TCGA-BF-A3DJ		Pre	0	TCGA	464	0			Female	25	Stage IIIB	III	WHITE		Distant Metastasis	Liver		217	[Not Available]	1	1079	C4	0.217779	0.2	0.08		0.1179	0.0685	0.5894	-0.3213	0.9876	0.3578	277.454	423.644	-1161.49	BRAF_Hotspot_Mutants	All_Primaries	-	UV sigture	keratin	hypo-methylated	MIR.type.1	PROT.type.2	OSC.6	0	0.0254079	0	0.00874774	0.0533524
TCGA-BF-A3DL		Pre	0	TCGA	769	0			Female	73	Stage IIIB	III	WHITE						[Not Available]	0	2451	C1	0.359524	0.51	0.02		-0.3032	-0.0375	-0.8096	-1.5263	-0.6309	0.0704	-828.889	-48.3687	-791.562	BRAF_Hotspot_Mutants	All_Primaries	-	UV sigture	keratin	normal-like	MIR.type.1	PROT.type.2	OSC.5	0	0.00963906	0	0	0.113346
TCGA-BF-A3DM		Pre	0	TCGA	601	0			Male	52	Stage IIA	Not Available	WHITE						[Not Available]	0	2242	C2	0.0703671	0.06	0.06		0.4282	0.1345	-0.5569	-1.5261	1.2644	0.3169	-432.986	802.979	-2752.36	BRAF_Hotspot_Mutants	All_Primaries	-	UV sigture	MITF-low	hypo-methylated	MIR.type.1	PROT.type.2	OSC.6	0	0.0275715	0	0	0.0281825
TCGA-BF-A3DN		Pre	0	TCGA	717	0			Female	70	Stage IIIC	III	WHITE						[Not Available]	0	2391	C1	0.162979	0.25	0.54		0.1615	-0.0195	-0.3679	-1.3852	-0.0364	0.4552	-713.747	889.06	-3266.47	BRAF_Hotspot_Mutants	All_Primaries	-	UV sigture	MITF-low	hypo-methylated	MIR.type.1	PROT.type.2	OSC.4	0	0.0102213	0	0	0.0738464
TCGA-BF-A5EO		Pre	0	TCGA	703	0			Male	54	Stage IIC	I/II	WHITE						[Not Available]	0	2373	C1	0.409936	0.4	0.06		0.0626	0.0255	-0.0986	0.2194	-0.4432	0.514	-314.125	321.428	-1283.95	RAS_Hotspot_Mutants	All_Primaries	-	UV sigture	keratin	hypo-methylated	-	-	OSC.3	0	0	0	0.0004	0.25627
TCGA-BF-A5EP		Pre	0	TCGA	335	0			Female	64	Stage IIIC	III	WHITE						[Not Available]	0	1698	C1	0.145644	0.25	0.1		0.3773	0.184	-0.8243	-1.7727	-0.8771	0.2649	-436.858	728.165	-1607.11	-	All_Primaries	-	-	keratin	hypo-methylated	MIR.type.2	-	-	0	0	0.00781373	0.00462903	0.104707
TCGA-BF-A5EQ		Pre	0	TCGA	323	0			Male	52	Stage IIC	I/II	WHITE						[Not Available]	0	1645	C1	0.253191	0.42	0.24		0.0897	0.097	0.2776	1.2857	-0.3165	0.2906	-805.615	791.102	-1202.05	BRAF_Hotspot_Mutants	All_Primaries	-	UV sigture	immune	CpG island-methylated	MIR.type.3	-	OSC.6	0	0.0652104	0.00549207	0.0295444	0.150283
TCGA-BF-A5ER		Pre	0	TCGA	327	0			Male	52	Stage IIC	I/II	WHITE						[Not Available]	0	1666	C4	0.1404	0.2	0.06		-0.0773	-0.1385	-1.0844	-1.8206	-1.8955	0.0166	-846.733	318.333	-838.985	-	All_Primaries	-	-	keratin	CpG island-methylated	MIR.type.3	-	-	0	0.00762044	0	0.00172647	0.0327174
TCGA-BF-A5ES		Pre	0	TCGA	490	0			Female	65	Stage IIC	I/II	WHITE						[Not Available]	0	2089	C3	0.242751	0.29	0.02		-0.128	-0.0405	-0.1459	-0.2717	-0.7428	0.0201	-373.097	86.2085	-1321.82	-	All_Primaries	-	-	immune	CpG island-methylated	MIR.type.4	-	-	0	0.0013181	0.0120888	0	0.120979
TCGA-BF-A9VF		Pre	0	TCGA	440	0			Male	66	Stage IIC	I/II	WHITE						[Not Available]	0	1996	C1	0.0670086	0.05	0.02		0.0407	0.117	-1.3263	-1.8336	-2.0364	-0.4369	-1472.89	-97.1132	-2088.57										0	0	0.031752	0.0161393	0
TCGA-BF-AAOU		Pre	0	TCGA	476	0			Female	62	Stage IIC	I/II	WHITE						[Not Available]	0	2064	C1	0.396191	0.41	0.01		0.2299	0.182	0.0447	0.2897	-0.5534	0.29	-668.002	865.82	-695.261										0	0.0487834	0.0490932	0.0147111	0.0144925
TCGA-BF-AAOX		Pre	0	TCGA	444	0			Male	72	Stage IIC	I/II	WHITE						[Not Available]	0	2002	C1	0.293761	0.32	0.01		0.3878	0.1375	-1.2883	-0.8115	-0.9993	-0.464	-725.363	119.523	3461.96										0	0.0204481	0.0484121	0.018902	0.156311
TCGA-BF-AAP0		Pre	0	TCGA	454	0			Female	29	Stage IV	IV	WHITE						[Not Available]	0	2021		0.676203	0.75	0.21		0.2605	0.1105	1.2504	2.8297	0.5127	0.1802	28.0098	542.156	1235.3										0	0.110871	0	0.0383476	0.391955
TCGA-BF-AAP1		Pre	0	TCGA	409	0			Male	75	Stage IIC	I/II	WHITE						[Not Available]	0	1929	C4	0.071425	0.15	0.27		0.1964	0.0775	-0.4705	-1.3614	-1.152	-0.0314	-1295.23	608.325	-2345.56										0	0.0055732	0	0	0.0344369
TCGA-BF-AAP2		Pre	0	TCGA	405	0			Male	51	Stage IIB	I/II	WHITE						[Not Available]	0	1916	C2	0.131007	0.11	0.22		0.3542	0.129	-0.0584	0.3152	0.6846	-0.0699	-1174.41	406.663	-1788.59										0	0.032736	0	0	0.173795
TCGA-BF-AAP4		Pre	0	TCGA	335	0			Male	50	Stage IIC	I/II	WHITE						[Not Available]	0	1698	C2	0.403742	0.58	0.18		0.4269	0.113	0.3135	0.7947	-0.2104	-0.0737	348.447	747.463	-2594.33										0	0	0.00228368	0.00184831	0.508985
TCGA-BF-AAP6		Pre	0	TCGA	325	0			Male	44	Stage III	III	WHITE						[Not Available]	0	1653	C1	0.103589	0.14	0.02		0.6677	0.2325	-0.6238	-1.4234	-0.5791	0.2236	-625.977	940.526	-1886.23										0	0	0.0726286	0.00293023	0.0247404
TCGA-BF-AAP7		Pre	0	TCGA	318	0			Female	65	Stage IIC	I/II	WHITE						[Not Available]	0	1624	C2	0.494773	0.59	0.04		-0.144	0.03	0.8233	1.4654	1.0942	0.5779	91.6145	211.781	-2133.52										0	0.0186054	0	0.00160934	0.3859
TCGA-BF-AAP8		Pre	0	TCGA	447	0			Male	47	Stage IIC	I/II	WHITE						[Not Available]	0	2007	C3	0.118079	0.17	0.11		-0.6986	-0.055	-0.3621	-0.3782	-0.5726	-0.5294	-405.085	-249.27	-1876.86										0	0.00204672	0.00662921	0.014631	0.0598663
TCGA-D3-A1Q1	NR	Pre	0	TCGA	504	1			Female	68	Stage IIIC	III	WHITE		Locoregiol Recurrence			58	[Not Available]	1	2216		0.0626401	0.03	0.08	1.51745	0.1318	0.022	-0.6993	-1.8045	-2.0297	-0.1311	-906.335	156.731	-2334.4	RAS_Hotspot_Mutants	All_Metastases	Regiol_Lymph_Node	not UV	keratin	hyper-methylated	MIR.type.4	PROT.type.1	OSC.3	0	0.00361991	0	0.0007	0.0203506
TCGA-D3-A1Q3	R	Pre	0	TCGA	507	1			Male	53	Stage IIC	I/II	WHITE						[Not Available]	1	2116		0.283856	0.37	0.12		0.1688	-0.002	0.3805	1.4475	0.0909	-0.2248	-184.189	365.601	-3359.91	Triple_WT	All_Metastases	Regiol_Lymph_Node	not UV	immune	CpG island-methylated	MIR.type.4	-	OSC.1	0	0.20208	0	0.0546908	0.247527
TCGA-D3-A1Q4		Pre	0	TCGA	3408	0			Female	42	Stage IIIC	III	WHITE						[Not Available]	0	1719		0.275411	0.48	0	1.19192	0.4329	0.073	0.2629	0.2908	-0.2687	0.7911	-893.78	765.783	-2657.55	BRAF_Hotspot_Mutants	All_Metastases	Regiol_Lymph_Node	UV sigture	MITF-low	hyper-methylated	MIR.type.4	PROT.type.3	OSC.6	0	0.152054	0	0.0944444	0.0290039
TCGA-D3-A1Q5		Pre	0	TCGA	3424	1			Male	49	I/II NOS	I/II	WHITE		Locoregiol Recurrence			2452	[Not Available]	1	1267		0.0566659	0.08	0	6.86981	-0.1969	-0.1545	-0.9393	-1.0328	-1.2771	0.4245	-638.565	752.346	-1230.1	BRAF_Hotspot_Mutants	All_Metastases	Regiol_Lymph_Node	UV sigture	MITF-low	hyper-methylated	MIR.type.4	PROT.type.3	OSC.4	0	0.132245	0	0.0147458	0.101892
TCGA-D3-A1Q6		Pre	0	TCGA	2184	1			Male	44	Stage III	III	WHITE		Regiol lymph node			48	[Not Available]	1	2070		0.38223	0.5	0.18	11.6763	0.24	0.1795	-0.1609	-0.5647	0.6773	-0.1255	313.564	-127.937	-534.77	BRAF_Hotspot_Mutants	All_Metastases	Regiol_Skin_or_Soft_Tissue	UV sigture	MITF-low	hypo-methylated	MIR.type.1	PROT.type.1	OSC.7	0	0.0212895	0	0.0138283	0.049156
TCGA-D3-A1Q7		Pre	0	TCGA	4053	0			Female	31	Stage IB	I/II	WHITE		Distant Metastasis	Other, Specify	soft tissue left buttock	921	[Not Available]	1	2625		0.488596	0.62	0.11		0.6362	0.0185	1.3666	2.2657	1.614	0.2441	1170.36	1220.38	-2023.71	BRAF_Hotspot_Mutants	All_Metastases	Regiol_Lymph_Node	UV sigture	immune	hyper-methylated	MIR.type.4	PROT.type.3	OSC.6	0	0.0233016	0	0.00389279	0.280049
TCGA-D3-A1Q8		Pre	0	TCGA	854	1			Male	22	Stage IV	IV	WHITE		Distant Metastasis	Lung		147	[Not Available]	1	492		0.412874	0.47	0	29.6795	0.1572	0.095	0.6563	0.7889	-0.5416	0.9957	74.0606	703.467	-4240.63	RAS_Hotspot_Mutants	All_Metastases	Regiol_Lymph_Node	UV sigture	MITF-low	hypo-methylated	MIR.type.4	PROT.type.3	OSC.3	0	0.143226	0	0.0533683	0.0370377
TCGA-D3-A1Q9	NR	Pre	0	TCGA	961	1			Male	61	Stage IIIB	III	WHITE		Regiol lymph node			44	[Not Available]	1	1995		0.229635	0.31	0.08	10.3775	0.3837	-0.0425	0.2133	0.693	0.4286	-0.1163	-249.712	701.073	-1038	BRAF_Hotspot_Mutants	All_Metastases	Regiol_Lymph_Node	not UV	immune	hypo-methylated	MIR.type.3	PROT.type.2	OSC.4	0	0.012216	0	0.00771007	0.338532
TCGA-D3-A1QA	NR	Pre	0	TCGA	2765	0			Male	44	Stage IB	I/II	WHITE		Distant Metastasis	Lung		1393	[Not Available]	1	415		0.302453	0.09	0.11	28.5382	0.3085	0.028	-0.42	-0.3514	0.7952	-0.3523	-619.751	1315.35	-627.822	BRAF_Hotspot_Mutants	All_Metastases	Regiol_Lymph_Node	not UV	immune	CpG island-methylated	MIR.type.3	PROT.type.2	OSC.5	0	0.0149869	0	0.00667457	0.17956
TCGA-D3-A1QB		Pre	0	TCGA	2912	0			Female	64	Stage III	III	WHITE		Locoregiol Recurrence			0	[Not Available]	1	2		0.445848	0.55	0.03	33.2533	-0.1796	-0.0875	1.058	2.2975	1.2067	-0.3289	1532.18	391.094	-1775.72	RAS_Hotspot_Mutants	All_Metastases	Regiol_Lymph_Node	UV sigture	immune	normal-like	MIR.type.4	PROT.type.1	OSC.3	0	0.012823	0	0.0367608	0.520572
TCGA-D3-A2J6		Pre	0	TCGA	1321	1			Male	54	Stage IIB	I/II	WHITE		New primary melanoma			448	[Not Available]	1	2009		0.288796	0.29	0.05	1.40334	0.6731	0.1895	-0.0748	0.2184	0.4669	-0.1937	500.691	415.134	-249.933	Triple_WT	All_Metastases	Regiol_Lymph_Node	not UV	keratin	normal-like	MIR.type.2	PROT.type.2	OSC.3	0	0	0	0.001	0.462873
TCGA-D3-A2J7		Pre	0	TCGA	3136	1			Male	56	Stage IIIC	III	WHITE		Regiol lymph node			13	[Not Available]	1	321		0.461597	0.58	0	2.53822	-0.0389	-0.108	0.3031	1.0392	1.4861	0.1908	997.069	526.53	-904.165	BRAF_Hotspot_Mutants	All_Metastases	Regiol_Lymph_Node	UV sigture	immune	hyper-methylated	MIR.type.2	-	OSC.7	0	0.0101387	0.00776556	0.0145325	0.213643
TCGA-D3-A2J8		Pre	0	TCGA	1992	1			Male	37	Stage IB	I/II	WHITE		Locoregiol Recurrence			1737	[Not Available]	1	740		0.645704	0.79	0.13	38.3276	0.6024	0.2385	1.0206	2.2219	1.3818	0.2622	746.522	737.627	-1333.56	RAS_Hotspot_Mutants	All_Metastases	Regiol_Lymph_Node	UV sigture	immune	normal-like	MIR.type.2	PROT.type.1	OSC.3	0	0.0412739	0	0.00222006	0.318725
TCGA-D3-A2J9		Pre	0	TCGA	723	1			Male	64	Stage IIIC	III	WHITE		Distant Metastasis	Lung		231	[Not Available]	1	1178		0.666939	0.8	0.04	41.0081	-0.1881	-0.1645	1.6136	3.3178	0.8103	-0.0654	502.919	373.554	-1451.58	Triple_WT	All_Metastases	Regiol_Lymph_Node	UV sigture	immune	normal-like	MIR.type.2	-	-	0	0.0395659	0	0.0352727	0.431534
TCGA-D3-A2JA		Pre	0	TCGA	3514	0			Male	57	Stage IIIA	III	WHITE		Regiol lymph node			40	[Not Available]	1	1905		0.35274	0.5	0.33	4.21024	0.4696	0.106	1.0149	0.1558	2.0167	0.9648	-410.941	292.778	-2128.58	BRAF_Hotspot_Mutants	All_Metastases	Regiol_Skin_or_Soft_Tissue	UV sigture	MITF-low	normal-like	MIR.type.2	-	OSC.5	0	0.0351455	0	0.0057996	0.0491085
TCGA-D3-A2JB		Pre	0	TCGA					Female	59	Stage 0	I/II	BLACK OR AFRICAN AMERICAN		Locoregiol Recurrence			3035	[Not Available]		1		0.648877	0.79	0.25	1.03876	0.67	0.1495	1.2587	3.0808	0.6111	-0.2177	254.794	641.584	-2980.33	Triple_WT	All_Metastases	Regiol_Lymph_Node	not UV	immune	normal-like	MIR.type.2	-	OSC.3	0	0.304086	0.0148207	0.0718175	0.174105
TCGA-D3-A2JC		Pre	0	TCGA	2639	0			Female	42	Stage III	III	WHITE						[Not Available]	0	1379		0.359238	0.53	0.08	25.2261	0.2227	-0.0145	0.6429	0.7974	0.1246	0.2121	504.766	257.904	-420.751	Triple_WT	All_Metastases	Regiol_Lymph_Node	not UV	immune	normal-like	MIR.type.2	PROT.type.3	-	0	0	0	0.00186719	0.292271
TCGA-D3-A2JD		Pre	0	TCGA	361	1			Male	47	Stage IIIC	III	WHITE		Distant Metastasis	Liver		85	[Not Available]	1	2544		0.454619	0.61	0.13		-0.1996	-0.1195	0.3997	2.1263	-1.0311	0.0926	-11.7224	-100.232	2048.66	BRAF_Hotspot_Mutants	All_Metastases	Regiol_Lymph_Node	UV sigture	immune	hypo-methylated	MIR.type.1	PROT.type.2	OSC.5	0	0.331403	0	0.0693464	0.163684
TCGA-D3-A2JE		Pre	0	TCGA	841	1			Female	64	Stage IIIC	III	WHITE					149	[Not Available]	1	514		0.107371	0.21	0.03	5.70266	0.8244	0.3325	-1.2577	-0.7124	-2.7062	-0.3402	-864.751	1017	-1894.42										0	0.203693	0	0.100273	0.0524427
TCGA-D3-A2JF		Pre	0	TCGA	1888	0			Male	63	Stage IA	I/II	WHITE		New primary melanoma			25	[Not Available]	1	1296		0.300303	0.42	0.15	4.93015	-0.0936	-0.0005	0.5616	2.0391	1.6982	0.1307	-397.619	-381.697	-2631.35	RAS_Hotspot_Mutants	All_Metastases	Distant_Metastases	UV sigture	immune	hypo-methylated	MIR.type.3	-	OSC.2	0	0.0529529	0.00554943	0.0768108	0.242561
TCGA-D3-A2JG		Pre	0	TCGA	3453	1			Female	19	Stage IIIA	III	WHITE		Distant Metastasis	Other, Specify	Left ischial rectal fossa, soft tissue	3279	[Not Available]	1	1670		0.195132	0.2	0.18	14.1192	-0.2401	0.1005	-0.5865	-0.6109	-1.324	-0.0988	-1363.7	690.135	-2750.28	BRAF_Hotspot_Mutants	All_Metastases	-	UV sigture	keratin	CpG island-methylated	MIR.type.3	-	OSC.7	0	0	0.0259476	0.0006	0.135504
TCGA-D3-A2JH		Pre	0	TCGA	1280	0			Male	57	Stage IB	I/II	WHITE		Distant Metastasis	Brain		569	[Not Available]	1	2204		0.614385	0.72	0.16	4.89091	0.627	0.09	1.1082	1.893	1.2427	-0.1146	810.435	1008.82	-3040.6	BRAF_Hotspot_Mutants	All_Metastases	Regiol_Skin_or_Soft_Tissue	UV sigture	immune	normal-like	MIR.type.4	-	OSC.7	0	0.0509935	0	0.0104033	0.58355
TCGA-D3-A2JK		Pre	0	TCGA	368	1			Male	13	Stage IIIC	III	WHITE		Distant Metastasis	Lung		261	[Not Available]	1	1361		0.309485	0.34	0	0.826392	-0.2759	-0.23	-0.3577	-0.7471	-1.7369	0.1644	-943.784	124.106	-1298.53	BRAF_Hotspot_Mutants	All_Metastases	Regiol_Lymph_Node	UV sigture	keratin	hypo-methylated	MIR.type.1	-	OSC.6	0	0.0367613	0	0.0162387	0.0132148
TCGA-D3-A2JL		Pre	0	TCGA	5219	0			Female	32	I/II NOS	I/II	WHITE		Distant Metastasis	Lung		2638	[Not Available]	1	1378		0.362056	0.55	0.16	53.3392	0.2715	0.1005	0.5475	1.9362	1.0738	-0.3417	24.0421	593.813	-1817.36	RAS_Hotspot_Mutants	All_Metastases	Regiol_Lymph_Node	UV sigture	immune	hyper-methylated	MIR.type.3	-	OSC.3	0	0.0227716	0	0.00985711	0.360653
TCGA-D3-A2JN		Pre	0	TCGA	2022	1			Female	35	Stage III	III	WHITE						[Not Available]	0	975		0.412289	0.67	0.16	6.92485	0.378	0.2955	0.4894	1.9948	-0.5064	0.4107	-168.108	802.116	-3327.45	BRAF_Hotspot_Mutants	All_Metastases	Regiol_Lymph_Node	UV sigture	immune	normal-like	MIR.type.1	PROT.type.1	OSC.4	0	0	0.105471	0.0376381	0.137031
TCGA-D3-A2JO		Pre	0	TCGA	2010	0			Female	39	Stage IIIC	III	WHITE		Distant Metastasis	Other, Specify	Chest wall, soft tissue	50	[Not Available]	1	2104		0.476526	0.67	0.11	5.14308	0.8449	0.2415	1.1859	1.8338	0.1609	-0.1097	532.654	1005.89	-1656.63	RAS_Hotspot_Mutants	All_Metastases	Regiol_Skin_or_Soft_Tissue	UV sigture	immune	hyper-methylated	MIR.type.2	PROT.type.3	OSC.1	0	0.0167929	0.00132081	0.00508571	0.235643
TCGA-D3-A2JP	R	Pre	0	TCGA	1812	0			Male	26	Stage IIIC	III	WHITE		Distant Metastasis	Liver		227	[Not Available]	1	1152		0.305245	0.42	0.06	4.3803	0.1689	0.0475	0.6412	1.2333	0.3171	0.0232	479.491	95.8749	-3548.48	BRAF_Hotspot_Mutants	All_Metastases	Regiol_Lymph_Node	UV sigture	immune	hypo-methylated	MIR.type.3	PROT.type.1	OSC.7	0	0	0.0193036	0.00313673	0.354665
TCGA-D3-A3BZ		Pre	0	TCGA	3976	0			Male	52	Stage IIB	I/II	WHITE					2340	[Not Available]	1	1196		0.547074	0.04	0.28	5.83857	0.3882	0.0735	0.9525	2.0991	0.4579	0.6666	953.002	568.465	-2336.01	Triple_WT	All_Metastases	Regiol_Lymph_Node	not UV	immune	normal-like	MIR.type.1	-	OSC.4	0	0.0987399	0	0.0895917	0.239628
TCGA-D3-A3C1		Pre	0	TCGA		0			Male	1	I/II NOS	I/II	WHITE						[Not Available]	0	1		0.329638	0.47	0.02	19.9101	-1.8345	-0.198	0.0124	0.5419	-0.5236	0.4155	483.69	-974.028	-1957.43	BRAF_Hotspot_Mutants	All_Metastases	Regiol_Lymph_Node	UV sigture	immune	hyper-methylated	MIR.type.2	PROT.type.1	OSC.4	0	0.124835	0	0	0.0625816
TCGA-D3-A3C3		Pre	0	TCGA		0			Female	1	I/II NOS	I/II	WHITE						[Not Available]	0	1		0.341519	0.43	0	26.4929	0.7238	0.2955	0.3973	1.1404	0.3794	-0.3663	-290.57	126.929	-2853.52	BRAF_Hotspot_Mutants	All_Metastases	Regiol_Lymph_Node	UV sigture	immune	hypo-methylated	MIR.type.1	PROT.type.3	OSC.4	0	0.055318	0	0	0.268918
TCGA-D3-A3C6		Pre	0	TCGA	1766	1			Female	43	Stage IB	I/II	WHITE		Distant Metastasis	Lung		1441	[Not Available]	1	464		0.116597	0.11	0.05	1.18219	0.8572	0.243	-0.5348	-1.7298	1.3212	-0.0049	-475.568	835.494	-2066.05	BRAF_Hotspot_Mutants	All_Metastases	Regiol_Lymph_Node	not UV	MITF-low	hypo-methylated	MIR.type.4	-	OSC.6	0	0.00174896	0.00779135	0.00203805	0
TCGA-D3-A3C7		Pre	0	TCGA	1429	0			Female	46	Stage III	III	WHITE						[Not Available]	0	451		0.22213	0.21	0	33.1747	-0.1766	0.0055	0.8455	0.9261	-0.6512	0.5632	1140.83	-133.805	351.737	BRAF_Hotspot_Mutants	All_Metastases	Regiol_Lymph_Node	UV sigture	MITF-low	hyper-methylated	MIR.type.1	-	OSC.4	0	0.00957406	0	0.0019527	0.205227
TCGA-D3-A3C8	NR	Pre	0	TCGA	1409	0			Female	47	Stage IIIC	III	WHITE		Distant Metastasis	Other, Specify	Lymph nodes, neck	55	[Not Available]	1	2180		0.7166	0.78	0.14		0.6764	0.1085	1.7754	2.8389	1.4521	0.2719	1680.89	457.914	-2201.75	Triple_WT	All_Metastases	Regiol_Skin_or_Soft_Tissue	UV sigture	immune	normal-like	MIR.type.2	-	OSC.1	0	0	0.00864251	0.0006	0.627701
TCGA-D3-A3CB	R	Pre	0	TCGA	5065	0			Male	28	I/II NOS	I/II	WHITE						[Not Available]	0	2114		0.579958	0.73	0.21	21.3643	-0.3042	-0.1145	1.592	2.8709	1.0771	0.0843	183.515	-395.108	-1227.95	BRAF_Hotspot_Mutants	All_Metastases	Regiol_Lymph_Node	UV sigture	immune	hyper-methylated	MIR.type.3	PROT.type.1	OSC.5	0	0.0379457	0	0.0769643	0.229933
TCGA-D3-A3CC		Pre	0	TCGA	2644	0			Female	58	Stage IIC	I/II	WHITE		Locoregiol Recurrence			96	[Not Available]	1	2666		0.216124	0.37	0.27	0.745675	0.2393	0.1175	0.0124	-0.8829	-0.895	0.1516	-1196.94	368.829	-2079.28	Triple_WT	All_Metastases	Regiol_Skin_or_Soft_Tissue	not UV	keratin	hyper-methylated	MIR.type.3	-	OSC.4	0	0.0512113	0	0	0.0386567
TCGA-D3-A3CE		Pre	0	TCGA	1832	1			Female	63	Stage III	III	WHITE		Regiol lymph node			0	[Not Available]	1	2		0.251261	0.38	0.01	9.58781	0.5515	0.0325	0.8309	1.7305	-0.0912	0.0039	-340.556	526.001	-2425.82	BRAF_Hotspot_Mutants	All_Metastases	Regiol_Lymph_Node	not UV	immune	hyper-methylated	MIR.type.4	PROT.type.3	OSC.7	0	0.0289831	0.0142891	0.0527429	0.344466
TCGA-D3-A3CF		Pre	0	TCGA	746	1			Female	50	Stage IIIC	III	WHITE		Distant Metastasis	Bone		129	[Not Available]	1	313		0.537248	0.78	0.01	13.8169	0.452	0.1465	1.0389	2.1812	0.5085	0.0722	130.351	464.638	-2716.18	Triple_WT	All_Metastases	Regiol_Lymph_Node	not UV	immune	normal-like	MIR.type.2	-	OSC.3	0	0.179225	0	0.08245	0.0957961
TCGA-D3-A3ML	NR	Pre	0	TCGA	422	1			Male	59	Stage IIIA	III	WHITE		Regiol lymph node			32	[Not Available]	1	1629		0.0292274	0.03	0.01		0.2947	-0.016	-1.7485	-2.343	-0.1807	-0.6501	-71.6692	677.884	-2933.78	RAS_Hotspot_Mutants	All_Metastases	Regiol_Lymph_Node	UV sigture	keratin	CpG island-methylated	MIR.type.3	PROT.type.3	OSC.1	0	0.0908597	0	0	0.11247
TCGA-D3-A3MO		Pre	0	TCGA	284	1			Male	36	Stage III	III	WHITE		Distant Metastasis	Lung		47	[Not Available]	1	2055		0.111851	0.06	0.95	1.77236	0.565	0.225	-0.3144	-2.2736	-1.5997	0.7244	-869.366	421.014	-2826.42	BRAF_Hotspot_Mutants	All_Metastases	Regiol_Skin_or_Soft_Tissue	UV sigture	MITF-low	hyper-methylated	MIR.type.4	PROT.type.3	OSC.4	0	0	0	0	0
TCGA-D3-A3MR		Pre	0	TCGA	3151	0			Male	31	Stage III	III	WHITE					3108	[Not Available]	1	1597		0.562361	0.63	0.37	36.5892	0.4047	0.1235	0.9966	2.5978	0.5099	0.2307	338.083	615.938	-3739.89	BRAF_Hotspot_Mutants	All_Metastases	Regiol_Skin_or_Soft_Tissue	UV sigture	immune	hypo-methylated	MIR.type.1	PROT.type.2	OSC.6	0	0.00211177	0.0360551	0.067027	0.344365
TCGA-D3-A3MU		Pre	0	TCGA	1209	0			Male	42	Stage IIIA	III	WHITE		Distant Metastasis	Brain		750	[Not Available]	1	2430		0.145834	0.16	0.46		-0.3537	-0.093	0.1028	0.2756	-0.441	0.644	-184.895	402.434	-877.802	BRAF_Hotspot_Mutants	All_Metastases	Regiol_Lymph_Node	UV sigture	immune	CpG island-methylated	MIR.type.1	-	OSC.4	0	0.0384674	0	0.0641332	0.0671267
TCGA-D3-A3MV	NR	Pre	0	TCGA	1378	0			Female	27	Stage IIIB	III	WHITE		Regiol lymph node			16	[Not Available]	1	617		0.18305	0.26	0.24	2.31671	0.5731	0.1955	-0.1506	-1.4269	0.132	0.4942	-338.467	391.746	-2635.57	RAS_Hotspot_Mutants	All_Metastases	Regiol_Skin_or_Soft_Tissue	UV sigture	MITF-low	hypo-methylated	MIR.type.4	PROT.type.2	OSC.3	0	0.0003	0.00338622	0	0
TCGA-D3-A51E	R	Pre	0	TCGA	5318	0			Female	28	I/II NOS	I/II	WHITE						[Not Available]	0	2155		0.227878	0.23	0.15	5.42669	0.469	0.029	0.6609	0.9676	0.6646	-0.2824	448.222	443.756	2989.35	RAS_Hotspot_Mutants	All_Metastases	Regiol_Skin_or_Soft_Tissue	UV sigture	immune	hypo-methylated	MIR.type.3	-	OSC.3	0	0	0.052438	0.0272759	0.18599
TCGA-D3-A51F		Pre	0	TCGA	1695	0			Male	40	Stage IIIC	III	WHITE						[Not Available]	0	704		0.769626			18.5852	0.1036	-0.076	1.927	2.8888	0.9979	0.4268	1307.95	290.772	-2148.15	BRAF_Hotspot_Mutants	All_Metastases	Regiol_Lymph_Node	UV sigture	immune	normal-like	MIR.type.2	-	OSC.7	0	0.00361359	0	0.0122292	0.562827
TCGA-D3-A51G	R	Pre	0	TCGA					Male	1	Stage 0	I/II	WHITE						[Not Available]		1		0.121722	0.24	0.23		0.99	0.2585	-0.1653	-0.6524	-0.4003	0.5186	-611.301	1120.78	-4015.54	RAS_Hotspot_Mutants	All_Metastases	Regiol_Skin_or_Soft_Tissue	UV sigture	MITF-low	hypo-methylated	MIR.type.4	-	OSC.1	0	0	0.0874739	0	0.0666727
TCGA-D3-A51H	R	Pre	0	TCGA	1714	0			Male	49	Stage IIIC	III	WHITE		Regiol lymph node			838	[Not Available]	1	2530		0.950331	0.9	0	2.43959	0.4031	0.098	1.5699	3.4698	0.526	-0.3761	201.753	-470.207	-3456.51	Triple_WT	All_Metastases	Regiol_Lymph_Node	UV sigture	immune	normal-like	MIR.type.2	-	OSC.4	0	0.5372	0.0647726	0.0303127	0.0880929
TCGA-D3-A51J		Pre	0	TCGA	4414	0			Male	8	Stage III	III	WHITE		Regiol lymph node			2008	[Not Available]	1	962		0.415756	0.45	0	27.2971	0.3482	0.047	1.0428	2.1812	0.6811	-0.0343	838.666	-315.154	-1772.42	BRAF_Hotspot_Mutants	All_Metastases	Regiol_Skin_or_Soft_Tissue	UV sigture	immune	hyper-methylated	MIR.type.3	-	OSC.5	0	0.00918068	0	0.0050913	0.445771
TCGA-D3-A51K		Pre	0	TCGA	1002	0			Male	40	Stage IIIB	III	WHITE						[Not Available]	0	8		0.165992	0.15	0.03	7.34221	0.3157	-0.033	-0.1001	1.5282	0.7528	-0.4575	-1.90176	436.421	-2010.74	Triple_WT	All_Metastases	Regiol_Lymph_Node	not UV	keratin	hyper-methylated	MIR.type.4	-	OSC.3	0	0	0.114268	0.156032	0.199794
TCGA-D3-A51N		Pre	0	TCGA	688	0			Female	45	Stage IV	IV	WHITE		Distant Metastasis	Other, Specify	Adrel Gland	18	[Not Available]	1	792		0.288552	0.47	0.22	40.8116	-0.3492	0.0945	0.7438	0.8947	1.4448	0.0176	392.676	-516.602	1409.47	BRAF_Hotspot_Mutants	All_Metastases	Regiol_Lymph_Node	UV sigture	immune	hypo-methylated	MIR.type.2	-	OSC.4	0	0	0.0509532	0.00505773	0.0492118
TCGA-D3-A51R		Pre	0	TCGA	1941	0			Male	49	Stage IIA	Not Available	WHITE		Regiol lymph node			1016	[Not Available]	1	23		0.0604242	0.09	0.03	37.4687	1.2698	0.465	-1.7563	-2.4166	-1.9667	-0.2114	-1568.22	1344.27	-3771.52	RAS_Hotspot_Mutants	All_Metastases	Regiol_Lymph_Node	UV sigture	MITF-low	hypo-methylated	MIR.type.4	-	OSC.2	0	0.316218	0	0.0591845	0.0424257
TCGA-D3-A51T	R	Pre	0	TCGA	818	0			Female	48	Stage IIIC	III	WHITE		New primary melanoma			210	[Not Available]	1	1034		0.188196	0.17	0.1	6.36328	0.1443	0.0545	0.0574	0.7419	0.001	-0.0373	-1157.22	243.124	-2434.95	RAS_Hotspot_Mutants	All_Metastases	Regiol_Lymph_Node	UV sigture	immune	CpG island-methylated	MIR.type.2	-	OSC.1	0	0.101117	0	0.0727381	0.0950166
TCGA-D3-A5GL	R	Pre	0	TCGA	3826	0			Male	63	Stage IB	I/II	WHITE		Distant Metastasis	Other, Specify	Large Intestine	1092	[Not Available]	1	106		0.183831	0.22	0.13	2.27897	0.6811	0.24	-0.8564	-2.0911	-1.1369	-0.0227	-683.559	987.749	-3045.53	-	All_Metastases	Regiol_Lymph_Node	-	keratin	hyper-methylated	MIR.type.2	-	-	0	0	0.126429	0	0
TCGA-D3-A5GN		Pre	0	TCGA	4129	0			Female	4	Stage I	I/II	WHITE		New primary melanoma			1279	[Not Available]	1	304		0.274761	0.47	0.46	18.5408	0.7766	0.1555	0.2333	0.5951	-0.0663	0.4264	-60.4904	1008.18	-1386.04	BRAF_Hotspot_Mutants	All_Metastases	Regiol_Lymph_Node	UV sigture	MITF-low	hyper-methylated	MIR.type.4	-	OSC.6	0	0.0166947	0	0.0238067	0.236113
TCGA-D3-A5GO		Pre	0	TCGA	4195	0			Male	50	Stage II	I/II	WHITE					757	[Not Available]	1	2438		0.21717	0.29	0.17	2.66011	0.2128	0.1035	0.3218	0.0228	1.4749	0.151	-359.902	846.593	-1806.01	RAS_Hotspot_Mutants	All_Metastases	Distant_Metastases	UV sigture	immune	hypo-methylated	-	-	OSC.1	0	0.00750056	0.00233858	0.00394185	0.0813052
TCGA-D3-A5GR		Pre	0	TCGA	5424	0			Female	12	Stage III	III	WHITE		Regiol lymph node			0	[Not Available]	1	2		0.462397			28.6452	0.5302	0.1255	0.8936	1.9773	-0.2133	0.3522	210.129	20.7616	-1704.27	BRAF_Hotspot_Mutants	All_Metastases	Regiol_Lymph_Node	UV sigture	immune	hyper-methylated	-	-	OSC.6	0	0.0213631	0.155583	0.0997022	0.0639143
TCGA-D3-A5GS		Pre	0	TCGA	553	0			Male	47	Stage IV	IV	WHITE		Distant Metastasis	Bone		44	[Not Available]	1	1995		0.17465	0.21	0.13	8.61005	-0.1738	-0.027	0.5677	0.0614	0.1515	0.1766	-66.7809	82.551	-264.078	BRAF_Hotspot_Mutants	All_Metastases	Regiol_Lymph_Node	UV sigture	immune	hypo-methylated	MIR.type.2	-	OSC.5	0	0.00669845	0	0	0.344629
TCGA-D3-A5GT		Pre	0	TCGA	487	0			Male	32	Stage IIIC	III	WHITE		Distant Metastasis|Distant Metastasis|Regiol lymph node	Lung|Liver|[Not Available]	[Not Applicable]|[Not Applicable]|[Not Applicable]	291	[Not Available]	1	1510	C4	0.068287	0.13	0.25	0.647663	-0.0301	0.011	-1.1629	-2.2466	-1.8439	-0.5566	-1508.68	182.982	-3319.33										0	0.0207499	0.0577264	0	0.0679464
TCGA-D3-A5GU		Pre	0	TCGA	3808	0			Male	25	Stage IB	I/II	WHITE		Distant Metastasis	Bone		3074	[Not Available]	1	1582		0.1669	0.27	0.15	10.4099	0.2209	-0.0505	0.3824	0.6135	0.0606	-0.2388	-472.321	600.762	-3871.07	BRAF_Hotspot_Mutants	All_Metastases	Regiol_Lymph_Node	UV sigture	immune	CpG island-methylated	MIR.type.3	-	OSC.6	0	0.0121786	0	0	0.316546
TCGA-D3-A8GB	R	Pre	0	TCGA	938	1			Male	37	Stage IIIB	III	WHITE		Distant Metastasis	Other, Specify	Soft tissue	347	[Not Available]	1	1742		0.578865	0.67	0.08	30.9178	-0.3138	0.0005	0.9687	2.5092	1.0723	0.2881	-21.9509	27.2387	-3975.65										0	0.0626611	0	0.081601	0.290343
TCGA-D3-A8GC	R	Pre	0	TCGA	2421	1			Male	37	Stage IIIC	III	WHITE		Distant Metastasis	Other, Specify	Supraclavicular lymph nodes	1859	[Not Available]	1	841		0.127606	0.19	0.35	29.6482	0.1008	0.1815	0.0101	-0.2371	-0.4643	-0.2211	-68.3078	258.365	-493.411										0	0.0215279	0	0.0621989	0.0220473
TCGA-D3-A8GD		Pre	0	TCGA	718	0			Female	52	Stage IIIC	III	WHITE		Distant Metastasis	Other, Specify	Retroperitoneal lymph nodes	147	[Not Available]	1	492		0.565513	0.72	0.1	20.1947	0.3207	0.06	1.3256	2.8239	1.7102	-0.2831	456.022	-126.906	-2751.53										0	0.125931	0	0.0722759	0.239349
TCGA-D3-A8GE		Pre	0	TCGA	804	0			Male	15	Stage IV	IV	WHITE		Distant Metastasis	Lung		59	[Not Available]	1	2227		0.355776	0.4	0.01	23.7018	-1.4288	-0.286	0.5335	0.7287	0.1015	0.84	968.108	345.246	-1655.15										0	0.0624937	0	0.0155384	0.216101
TCGA-D3-A8GI		Pre	0	TCGA	1780	1			Male	57	Stage IA	I/II	WHITE		New primary melanoma			50	[Not Available]	1	2104		0.0955347	0.21	0.32	1.72487	0.1223	0	-0.5576	-1.5337	-1.4294	0.4141	-35.0256	-21.324	-470.537										0	0.00340255	0.00209092	0.0011571	0.0166717
TCGA-D3-A8GJ		Pre	0	TCGA	7342	0			Male	7	Stage II	I/II	WHITE		Distant Metastasis	Brain		1443	[Not Available]	1	466		0.46835	0.55	0.04	17.6001	0.3261	0.004	1.1253	2.2306	1.048	-0.0577	859.541	810.561	-3379.62										0	0.00843303	0	0.00956492	0.403819
TCGA-D3-A8GK	R	Pre	0	TCGA	5177	0			Male	34	Stage IIA	Not Available	WHITE		Locoregiol Recurrence			1555	[Not Available]	1	578		0.0658536	0.07	0.04	5.95784	0.3816	0.0865	-1.4371	-2.0042	-1.8045	-0.1721	-1012.36	1100.17	-626.937										0	0.061343	0	0.0328755	0.0862906
TCGA-D3-A8GL	R	Pre	0	TCGA	2711	1			Male	32	Stage IIIB	III	WHITE		Regiol lymph node			1333	[Not Available]	1	355		0.0456767	0.05	0.04	3.25865	0.2628	0.004	-1.4853	-2.8364	-0.7688	-0.4964	-978.292	814.768	-2038.74										0	0	0.0346523	0.00695556	0.0174064
TCGA-D3-A8GM	R	Pre	0	TCGA	3259	1			Male	62	Stage IIB	I/II	WHITE						[Not Available]	0	1660		0.344462	0.46	0.2	9.33008	0.7647	0.0775	0.307	0.9728	1.4049	-0.2908	801.949	1573.28	-2406.46										0	0.0707347	0	0.00524871	0.136924
TCGA-D3-A8GN	R	Pre	0	TCGA	4897	0			Female	16	I/II NOS	I/II	WHITE		Distant Metastasis	Lung		787	[Not Available]	1	2472		0.499165	0.74	0.16	15.6005	-0.0605	0.059	0.6475	2.0204	0.4985	0.2319	401.94	-141.607	-453.555										0	0.0855412	0	0.0107846	0.282132
TCGA-D3-A8GO	R	Pre	0	TCGA		1			Female	1	I/II NOS	I/II	WHITE						[Not Available]	1	1		0.439976	0.63	0.17	22.1005	-0.4525	0	0.3562	2.0171	-0.8416	0.236	-1293.46	-1267.21	-4291.28										0	0.308304	0	0.200588	0.0696671
TCGA-D3-A8GP		Pre	0	TCGA	4646	0			Male	66	Stage III	III	WHITE		Locoregiol Recurrence			535	[Not Available]	1	2159		0.0455955	0.04	0.09	4.25217	0.0726	0	-1.0737	-1.2827	-1.0594	-0.1165	-1108.04	233.506	-2642.18										0	0.0036555	0.00551739	0.0218669	0.29066
TCGA-D3-A8GQ		Pre	0	TCGA	884	1			Male	55	Stage II	I/II	WHITE		Distant Metastasis	Liver		578	[Not Available]	1	2214		0.32108	0.37	0.01	7.01786	0.4412	0.2145	-0.4111	-0.1621	-1.2626	0.375	-1639.11	593.258	-2137.46										0	0.0612748	0	0.0551962	0.107204
TCGA-D3-A8GR		Pre	0	TCGA					Female	43	Stage 0	I/II	WHITE		Locoregiol Recurrence			1720	[Not Available]		1		0.170274	0.2	0	3.11458	-0.1829	-0.0565	-0.5234	-1.4884	-0.0029	-0.4693	-1283.4	-538.461	-956.76										0	0.0598079	0.034829	0	0.0775507
TCGA-D3-A8GS		Pre	0	TCGA	3564	1			Male	41	Stage I	I/II	WHITE		Regiol lymph node			2641	[Not Available]	1	1381		0.436071	0.47	0.18	12.8713	0.3098	0.0945	0.7484	1.8351	0.2165	-0.6393	284.147	176.745	-2507.96										0	0	0.0418288	0.0551338	0.267467
TCGA-D3-A8GV		Pre	0	TCGA	5101	1			Male	14	I/II NOS	I/II	WHITE		Regiol lymph node			3896	[Not Available]	1	1873		0.0502509	0.06	0.02	0.302155	0.7381	0.343	-0.7099	-1.3461	-0.8316	-0.3276	-546.445	1061.09	-2523.88										0	0.0009	0	0.0039903	0.069133
TCGA-D9-A148		Pre	0	TCGA	4609	0			Male	29	[Not Available]	Not Available	WHITE		Distant Metastasis			4287	[Not Available]	1	1972		0.168732	0.27	0.07	3.51272	-0.2661	-0.107	-0.0253	0.3261	-0.3109	-0.1873	39.5296	150.537	1113.91	BRAF_Hotspot_Mutants	All_Metastases	Regiol_Lymph_Node	UV sigture	immune	hypo-methylated	MIR.type.2	PROT.type.2	OSC.4	1	0.00980638	0	0.0120162	0.254582
TCGA-D9-A149		Pre	0	TCGA	1663	0			Female	54	[Not Available]	Not Available	WHITE		New primary melanoma	Other, Specify		1290	[Not Available]	1	314		0.268463	0.43	0.07	7.93898	0.0503	-0.042	0.4168	0.9732	2.0653	-0.225	-361.712	622.427	-2119.44	Triple_WT	All_Metastases	Regiol_Skin_or_Soft_Tissue	UV sigture	immune	hyper-methylated	MIR.type.2	PROT.type.2	-	0	0.0446808	0	0	0.157932
TCGA-D9-A1JW		Pre	0	TCGA	111	0			Male	71	[Not Available]	Not Available	WHITE		Distant Metastasis	Other, Specify		10	[Not Available]	1	4		0.352809	0.44	0.12	17.9324	-0.1197	-0.0625	0.6481	1.5954	0.7733	-0.3138	367.324	81.5107	-1174.21	Triple_WT	All_Metastases	Regiol_Lymph_Node	UV sigture	immune	hyper-methylated	MIR.type.2	PROT.type.2	OSC.7	0	0.0496135	0	0	0.276554
TCGA-D9-A1JX		Pre	0	TCGA	216	1			Female	69	[Not Available]	Not Available	WHITE		Distant Metastasis	Other, Specify	iliac nymph nodes	195	[Not Available]	1	917		0.212511	0.2	0.01	16.4153	0.4742	-0.044	0.7469	0.9797	0.1315	-0.0022	-362.521	612	-3643.71	BRAF_Hotspot_Mutants	All_Metastases	Regiol_Lymph_Node	UV sigture	immune	hyper-methylated	MIR.type.4	PROT.type.2	OSC.4	0	0.00587604	0	0.00531821	0.460233
TCGA-D9-A1X3		Pre	0	TCGA	551	0			Male	52	[Not Available]	Not Available	WHITE						[Not Available]	0	2183		0.0498977			6.44839	0.2267	-0.0435	-1.256	-2.5021	-1.4452	0.0587	-1327.68	777.567	-2611.61										0	0.0278602	0	0	0.0001
TCGA-D9-A3Z1		Pre	0	TCGA	468	1			Male	55	Stage IIIC	III	WHITE		Locoregiol Recurrence	Lung		335	[Not Available]	1	1698		0.541313	0.67	0.02		0.4933	0.1225	0.95	1.7325	0.2417	-0.3036	183.469	882.717	-2956.41	RAS_Hotspot_Mutants	All_Metastases	Regiol_Lymph_Node	UV sigture	immune	normal-like	MIR.type.2	PROT.type.1	OSC.3	0	0	0.00861028	0.0259397	0.272257
TCGA-D9-A3Z3		Pre	0	TCGA	678	0			Female	28	Stage IIIB	III	WHITE						[Not Available]	0	2338		0.366695	0.39	0.09	25.6399	0.1023	-0.0315	0.7033	1.8986	0.1359	-0.0057	-137.297	600.538	-527.573	BRAF_Hotspot_Mutants	All_Metastases	Regiol_Lymph_Node	UV sigture	immune	hypo-methylated	MIR.type.2	-	OSC.7	0	0.198837	0	0.0446701	0.117432
TCGA-D9-A3Z4		Pre	0	TCGA	519	1			Male	43	Stage IIIC	III	WHITE		Regiol lymph node	Other, Specify	lymph node	192	[Not Available]	1	891	C2	0.178451	0.32	0.14	3.16664	0.1168	-0.0245	0.3972	0.8272	1.189	0.1214	-273.904	258.309	498.568	RAS_Hotspot_Mutants	All_Primaries	Primary_Disease	UV sigture	immune	hyper-methylated	MIR.type.4	PROT.type.2	OSC.3	0	0.0411794	0	0	0.168838
TCGA-D9-A4Z2		Pre	0	TCGA	190	1			Male	39	Stage IIIC	III	WHITE		Distant Metastasis	Lung		80	[Not Available]	1	2487	C4	0.110493	0.11	0.2	2.90177	0.4882	0.0515	-0.1356	-1.1157	-0.8541	0.1715	-527.193	387.417	-2260.18	BRAF_Hotspot_Mutants	All_Primaries	Primary_Disease	not UV	MITF-low	hypo-methylated	MIR.type.3	-	OSC.4	0	0	0.0183063	0.00230472	0.0204324
TCGA-D9-A4Z3		Pre	0	TCGA	505	0			Female	62	Stage IIIC	III	WHITE		Locoregiol Recurrence			100	[Not Available]	1	5	C4	0.152531	0.14	0.06	4.60179	0.3296	0.0795	-0.2355	-1.0221	-1.8314	-0.3094	-277.142	522.832	-1539.18	RAS_Hotspot_Mutants	All_Primaries	-	UV sigture	MITF-low	CpG island-methylated	MIR.type.4	-	OSC.3	0	0	0.0109507	0.0018554	0.224778
TCGA-D9-A4Z5		Pre	0	TCGA	218	0			Male	57	Stage IIB	I/II	WHITE						[Not Available]	0	1087	C4	0.0549533	0.07	0.21	9.17235	-1.1641	-0.287	-0.0836	-1.5069	0.4744	0.3482	-680.562	-1152.56	-1414.67	Triple_WT	All_Primaries	-	not UV	keratin	hyper-methylated	MIR.type.2	-	OSC.4	0	0.0288703	0	0.0007	0.0127996
TCGA-D9-A4Z6		Pre	0	TCGA	561	1			Male	43	Stage IIIC	III	WHITE		Distant Metastasis	Brain		213	[Not Available]	1	1049		0.206572			4.02697	0.3301	0.0295	-0.6582	-1.1632	0.0933	-0.062	-648.662	216.559	-2191.41										0	0.00155493	0.0101342	0.0005	0.0258676
TCGA-D9-A6E9		Pre	0	TCGA	301	0			Female	64	Stage IIIA	III	WHITE						[Not Available]	0	1555		0.449093	0.63	0.02		-0.3189	-0.0745	1.3922	2.4924	0.8118	-0.1223	1139.71	58.3612	-185.016										0	0.0131261	0	0.0080485	0.459246
TCGA-D9-A6EA		Pre	0	TCGA	766	0			Male	59	Stage IIIC	III	WHITE						[Not Available]	0	2448		0.0975692	0.15	0.38	6.24022	0.439	0.0355	-0.7439	-1.0243	0.5709	-0.1672	390.514	1122.69	-1945.64										0	0	0.0377114	0.0146115	0
TCGA-D9-A6EC		Pre	0	TCGA	2359	0			Male	45	Stage IIIA	III	WHITE						[Not Available]	0	1206		0.0399368	0.05	0.11		0.1669	0.187	-0.6038	-1.4899	0.672	-0.3038	-176.099	336.343	-2243.54										0	0.00240598	0.00435723	0	0.0126552
TCGA-D9-A6EG		Pre	0	TCGA	698	1			Male	45	Stage IIIA	III	WHITE		Distant Metastasis	Bone		398	[Not Available]	1	1899		0.058041	0.16	0.08	1.50602	0.2774	0.0505	-0.8429	-2.3186	-1.7352	-0.5756	-1045.16	1156.17	-1796.2										0	0.0172495	0	0	0
TCGA-DA-A1HV	NR	Pre	0	TCGA	2329	0			Female	64	Stage IIIB	III	WHITE		Distant Metastasis	Other, Specify	mediastinum	866	[Not Available]	1	2563		0.278028	0.33	0.18	21.7274	0.3891	0.099	1.0312	1.786	0.935	-0.0773	-198.135	297.89	-1573.67	RAS_Hotspot_Mutants	All_Metastases	Regiol_Lymph_Node	UV sigture	immune	hypo-methylated	MIR.type.1	PROT.type.3	OSC.3	0	0	0.0168546	0.0143323	0.304544
TCGA-DA-A1HW	R	Pre	0	TCGA	820	0			Female	26	Stage IIIB	III	WHITE					852	[Not Available]	1	2547		0.377264	0.33	0.22	37.0812	0.5515	0.0245	0.9087	1.8568	0.2828	-0.0422	279.371	1281.95	-1267.36	BRAF_Hotspot_Mutants	All_Metastases	Regiol_Lymph_Node	UV sigture	immune	hypo-methylated	MIR.type.2	PROT.type.4	OSC.5	0	0.0211475	0	0.0212525	0.457396
TCGA-DA-A1HY		Pre	0	TCGA	4407	0			Male	31	Stage III	III	WHITE						[Not Available]	0	1997		0.156592	0.24	0.13	1.12191	-0.0727	0.075	-0.4298	-1.6134	0.6951	0.6008	422.282	155.023	-488.385	BRAF_Hotspot_Mutants	All_Metastases	Regiol_Lymph_Node	UV sigture	MITF-low	hypo-methylated	MIR.type.1	PROT.type.3	OSC.5	0	0.0728763	0	0.0239329	0.011106
TCGA-DA-A1I0		Pre	0	TCGA	620	1			Male	52	Stage IV	IV	WHITE		Distant Metastasis	Brain		599	[Not Available]	1	2238		0.433944	0.53	0.28	1.42623	-0.5742	-0.143	0.1729	1.139	-1.653	0.155	-993.772	212.362	615.1	BRAF_Hotspot_Mutants	All_Metastases	Regiol_Skin_or_Soft_Tissue	UV sigture	immune	hypo-methylated	-	PROT.type.1	OSC.5	0	0.071728	0	0.00714888	0.148632
TCGA-DA-A1I1		Pre	1	TCGA	6768	0			Male	44	Stage III	III	WHITE		Distant Metastasis	Other, Specify	Jejunum	5591	[Not Available]	1	2193		0.312696	0.44	0.03	1.61092	-0.1973	-0.171	0.8122	1.0432	0.8073	0.4405	913.474	587.522	-778.949	RAS_Hotspot_Mutants	All_Metastases	Regiol_Skin_or_Soft_Tissue	UV sigture	immune	hyper-methylated	MIR.type.2	-	OSC.3	1	0.016249	0	0.00312194	0.116391
TCGA-DA-A1I2		Pre	0	TCGA	5370	1			Male	34	Stage III	III	WHITE		Regiol lymph node			4679	[Not Available]	1	2050		0.149508	0.23	0.03	2.67288	0.2241	-0.0645	0.1395	0.3144	1.9181	0.0528	-525.912	789.179	-3436.73	BRAF_Hotspot_Mutants	All_Metastases	Regiol_Lymph_Node	UV sigture	immune	normal-like	MIR.type.2	PROT.type.4	OSC.4	0	0.0278498	0	0.00596671	0.143734
TCGA-DA-A1I4	R	Pre	0	TCGA	1093	1			Male	40	Stage IIIC	III	WHITE		Distant Metastasis	Brain		889	[Not Available]	1	2586		0.410016	0.5	0	2.01676	0.2799	0.191	0.9454	-0.5941	0.0297	0.359	-687.18	765.01	-1150.62	BRAF_Hotspot_Mutants	All_Metastases	Regiol_Skin_or_Soft_Tissue	UV sigture	keratin	normal-like	MIR.type.1	PROT.type.1	OSC.6	0	0	0.0538278	0	0
TCGA-DA-A1I5		Pre	0	TCGA	4107	0			Female	16	Stage IV	IV	WHITE						[Not Available]	0	1932		0.423134	0.44	0.1	5.02774	0.4858	0.2015	1.1224	1.7271	0.0984	0.179	249.647	707.978	-487.112	BRAF_Hotspot_Mutants	All_Metastases	Distant_Metastases	UV sigture	immune	hypo-methylated	MIR.type.2	PROT.type.2	OSC.5	0	0.00754591	0.00453974	0.00970483	0.128583
TCGA-DA-A1I7		Pre	0	TCGA	2703	0			Male	51	Stage IIIB	III	WHITE		Distant Metastasis	Other, Specify	skin scrotum	755	[Not Available]	1	2436		0.211441	0.42	0.02	2.24611	-0.0265	-0.1005	-0.0198	-0.488	0.3781	0.6344	496.075	33.4365	-206.375	BRAF_Hotspot_Mutants	All_Metastases	Regiol_Skin_or_Soft_Tissue	UV sigture	MITF-low	hyper-methylated	MIR.type.1	-	OSC.4	0	0.0249987	0	0.00811999	0.127746
TCGA-DA-A1I8		Pre	0	TCGA	1640	1			Female	52	Stage IIC	I/II	WHITE		Regiol lymph node			961	[Not Available]	1	2668		0.193452	0.33	0.05	4.14824	-0.0745	-0.086	0.2675	-1.7576	-0.0839	0.4968	429.78	-817.606	1060.54	BRAF_Hotspot_Mutants	All_Metastases	Regiol_Skin_or_Soft_Tissue	UV sigture	MITF-low	hypo-methylated	MIR.type.4	PROT.type.3	OSC.7	0	0	0.0519975	0.0008	0
TCGA-DA-A1IA	NR	Pre	0	TCGA	2005	1			Female	21	Stage IIIB	III	WHITE						[Not Available]	1	960		0.0690913	0.06	0.07	0.538731	-0.488	-0.259	-0.9949	-1.5999	-1.0983	-0.3155	-355.524	-227.314	1228.48	Triple_WT	All_Metastases	Distant_Metastases	UV sigture	keratin	CpG island-methylated	MIR.type.3	PROT.type.2	-	0	0.0510904	0.0543757	0	0.21538
TCGA-DA-A1IB	NR	Pre	0	TCGA	825	0			Female	58	Stage IIIC	III	WHITE		Distant Metastasis	Brain		243	[Not Available]	1	1253		0.740368	0.82	0.28	26.3958	0.0721	-0.0785	1.7967	3.483	0.4421	0.0295	575.036	-14.1154	-1600.56	Triple_WT	All_Metastases	Regiol_Lymph_Node	not UV	immune	normal-like	MIR.type.2	PROT.type.4	OSC.7	0	0.138701	0.0305884	0.045613	0.138712
TCGA-DA-A1IC		Pre	0	TCGA	2071	1			Male	70	Stage IIIB	III	WHITE		Distant Metastasis	Lung		1930	[Not Available]	1	902		0.162792	0.23	0	0.60241	-0.1304	-0.0555	-0.1689	-0.4541	-0.1505	0.0472	-188.213	496.882	-1232.42	NF1_Any_Mutants	All_Metastases	Regiol_Skin_or_Soft_Tissue	UV sigture	keratin	hyper-methylated	MIR.type.3	PROT.type.2	OSC.2	0	0.0205435	0.00206191	0	0.184157
TCGA-DA-A3F2	R	Pre	0	TCGA	1032	1			Male	44	Stage IIIB	III	WHITE		Distant Metastasis	Other, Specify	peritoneal	430	[Not Available]	1	1976		0.782557	0.07	0	46.4872	-1.0968	-0.457	1.9773	3.4588	-0.2427	0.6004	891.047	-320.707	228.234	Triple_WT	All_Metastases	Regiol_Skin_or_Soft_Tissue	not UV	immune	normal-like	MIR.type.1	PROT.type.1	OSC.1	1	0	0.057351	0.0181368	0.390765
TCGA-DA-A3F3		Pre	0	TCGA	319	1			Male	41	Stage IIIB	III	WHITE						[Not Available]	1	1627		0.0465912	0.08	0.08	5.78272	0.5489	0.033	-0.3027	-0.4716	-0.5689	-0.4152	-270.615	527.038	-2677.67	RAS_Hotspot_Mutants	All_Metastases	Regiol_Lymph_Node	UV sigture	immune	hypo-methylated	MIR.type.3	PROT.type.1	OSC.3	0	0.0306291	0	0	0.139904
TCGA-DA-A3F5	NR	Pre	1	TCGA	6873	1			Male	34	Stage I	I/II	WHITE		Distant Metastasis	Lung		6841	[Not Available]	1	2346		0.363818	0.56	0.33	0.161998	0.8151	0.304	-0.3388	-1.4599	-1.3684	0.3842	1406.87	-212.904	361.244	BRAF_Hotspot_Mutants	All_Metastases	Regiol_Lymph_Node	UV sigture	MITF-low	hyper-methylated	MIR.type.1	PROT.type.1	OSC.7	1	0.0006	0.00330247	0.00124845	0.0335157
TCGA-DA-A3F8		Pre	0	TCGA	1319	0			Male	28	Stage IIIB	III	WHITE						[Not Available]	0	342		0.549772	0.61	0.23	43.8834	-0.1708	-0.1195	1.4326	2.6323	1.0774	-0.0761	1030.13	87.0199	-1869.9	BRAF_Hotspot_Mutants	All_Metastases	Regiol_Lymph_Node	UV sigture	immune	normal-like	MIR.type.1	PROT.type.2	OSC.7	0	0.0189632	0	0.0116504	0.561827
TCGA-DA-A95V		Pre	0	TCGA	2193	0			Female	72	Stage IIC	I/II	WHITE						[Not Available]	0	1097		0.293138	0.45	0.44		-0.9588	-0.24	0.2038	1.7784	-0.4406	-0.2752	105.38	-857.875	-631.859										0	0.0609458	0.0023595	0.01805	0.220098
TCGA-DA-A95W		Pre	0	TCGA	1136	0			Male	41	Stage IIIB	III	WHITE						[Not Available]	0	155		0.107893	0.12	0.02		0.2706	0.098	-0.1844	0.3649	-0.6691	-0.3511	-1167.07	100.06	-3585.4										0	0.00524113	0.010222	0	0.331455
TCGA-DA-A95X		Pre	0	TCGA	2249	0			Male	51	Stage IB	I/II	WHITE						[Not Available]	0	1138		0.163409	0.13	0.03		0.3582	0.102	0.209	-0.3416	0.273	-0.0109	77.9901	205.198	-2270.65										0	0.0459568	0	0.0035725	0.175373
TCGA-DA-A95Y		Pre	0	TCGA	430	1			Male	57	Stage IIC	I/II	WHITE		Distant Metastasis	Lung		338	[Not Available]	1	1709		0.124394	0.25	0.08		0.1029	0.002	-0.6353	-0.8704	0.1119	-0.5054	118.002	52.7461	-1876.43										0	0.107244	0	0.0107386	0.121299
TCGA-DA-A95Z		Pre	0	TCGA	396	0			Male	76	Stage IV	IV	WHITE						[Not Available]	0	1896		0.0858059	0.2	0.01		0.39	0.1155	-0.6184	-1.1912	-1.6306	-0.3513	-801.789	886.152	-1057.25										0	0.00931543	0	0.00263912	0.148693
TCGA-DA-A960		Pre	0	TCGA	804	0			Male	62	Stage IIB	I/II	WHITE						[Not Available]	0	2493	C4	0.0653151	0.15	0.14		-0.0094	0	-1.2743	-2.0071	-1.5434	-0.9205	-1908.91	-37.427	-2210.93										0	0.146694	0	0	0.087648
TCGA-EB-A1NK		Pre	0	TCGA	1039	0			Male	37	Stage IIC	I/II	WHITE						[Not Available]	0	49	C1	0.285945	0.35	0.12	0.555556	-0.0325	0.003	-0.2871	-0.5846	-0.8619	0.3615	-261.512	521.41	-1271.52	RAS_Hotspot_Mutants	All_Primaries	Primary_Disease	UV sigture	keratin	hypo-methylated	MIR.type.1	PROT.type.1	OSC.2	0	0.0224499	0	0.00328195	0.168015
TCGA-EB-A24C		Pre	0	TCGA	632	0			Male	45	[Not Available]	Not Available	WHITE		Regiol lymph node			465	[Not Available]	1	2043	C4	0.0816899	0.09	0.15	3.39628	-0.2819	-0.1225	-0.7808	-1.9748	0.3069	0.1551	-1054.6	734.813	-1950.65	BRAF_Hotspot_Mutants	All_Primaries	Primary_Disease	not UV	keratin	CpG island-methylated	MIR.type.2	PROT.type.2	OSC.4	0	0.0106022	0.00255927	0.01613	0.0479031
TCGA-EB-A24D		Pre	0	TCGA	645	0			Male	61	Stage IIIB	III	WHITE		Regiol lymph node			500	[Not Available]	1	2105	C1	0.116471	0.21	0.17	8.30512	0.3279	0.0265	-0.4598	0.2967	-1.101	-0.2059	-362.705	275.595	-1443.2	BRAF_Hotspot_Mutants	All_Primaries	Primary_Disease	UV sigture	keratin	CpG island-methylated	MIR.type.3	PROT.type.3	OSC.6	0	0.0939126	0	0.103182	0.205747
TCGA-EB-A299		Pre	0	TCGA	378	0			Male	52	Stage IIA	Not Available	WHITE						[Not Available]	0	1841	C1	0.229057	0.3	0.19	9.59472	-0.2637	0.005	-0.0405	-0.142	0.1924	0.4731	-737.054	-159.995	-1599.94	BRAF_Hotspot_Mutants	All_Primaries	Primary_Disease	UV sigture	keratin	hypo-methylated	MIR.type.1	PROT.type.1	OSC.5	0	0	0	0.0047928	0.280297
TCGA-EB-A3HV		Pre	0	TCGA	39	0			Male	26	Stage IIC	I/II	WHITE						[Not Available]	0	1875	C6	0.116863	0.25	0	1.39883	-0.4066	-0.206	0.1736	-0.8671	-0.5454	0.6478	-363.227	37.0923	-251.09	BRAF_Hotspot_Mutants	All_Primaries	Primary_Disease	UV sigture	keratin	CpG island-methylated	MIR.type.2	PROT.type.2	OSC.4	0	0	0.00635234	0	0.0313843
TCGA-EB-A3XB		Pre	0	TCGA	796	0			Male	52	Stage II	I/II	WHITE						[Not Available]	0	2482	C1	0.39506	0.59	0.05	2.12411	0.3385	0.0675	-0.0026	-0.1595	-0.5457	-0.049	-101.25	852.882	-517.01	BRAF_Hotspot_Mutants	All_Primaries	Primary_Disease	UV sigture	keratin	hyper-methylated	MIR.type.2	PROT.type.1	OSC.7	0	0	0.0255817	0.0100726	0.238912
TCGA-EB-A3XC	R	Pre	0	TCGA	650	0			Male	63	Stage IIC	I/II	WHITE		Distant Metastasis|Regiol lymph node	Other, Specify|[Not Available]	Chest wall|[Not Applicable]	74	[Not Available]	1	2417	C1	0.18053	0.39	0.2	8.03487	1.0392	0.422	-0.1611	-0.3776	0.0703	0.0853	-437.502	1475.34	-2091.24	BRAF_Hotspot_Mutants	All_Primaries	Primary_Disease	UV sigture	keratin	hypo-methylated	MIR.type.1	PROT.type.2	OSC.5	0	0.00327021	0.0008	0	0.151524
TCGA-EB-A3XD		Pre	0	TCGA	1160	0			Female	42	Stage IIC	I/II	WHITE						[Not Available]	0	181	C3	0.452345	0.81	0.28	3.50164	-0.7776	-0.158	0.4887	1.1664	-0.2068	0.4318	-754.207	-238.746	1042.51	BRAF_Hotspot_Mutants	All_Primaries	Primary_Disease	UV sigture	keratin	normal-like	MIR.type.1	PROT.type.1	OSC.7	0	0.036268	0	0.00276343	0.138662
TCGA-EB-A3XE		Pre	0	TCGA	180	0			Female	66	Stage IIA	Not Available	WHITE						[Not Available]	0	793	C3	0.253955	0.37	0.03	3.7746	-0.9769	-0.111	-0.1118	0.2835	-0.4809	0.3118	-494.452	-613.2	-2459.17	BRAF_Hotspot_Mutants	All_Primaries	Primary_Disease	not UV	keratin	CpG island-methylated	MIR.type.3	PROT.type.1	OSC.7	0	0.0171527	0	0	0.222267
TCGA-EB-A3XF		Pre	0	TCGA	278	0			Male	46	Stage IIC	I/II	WHITE						[Not Available]	0	1447	C4	0.2432	0.22	0.04	4.36034	0.1865	0.0685	0.195	-1.1021	1.0329	0.1839	-214.815	391.672	-2491.37	-	All_Primaries	Primary_Disease	-	keratin	hypo-methylated	MIR.type.4	PROT.type.1	-	0	0.0102526	0	0	0.00187805
TCGA-EB-A3Y6	R	Pre	0	TCGA	126	0			Female	45	Stage IIC	I/II	WHITE						[Not Available]	0	283	C1	0.282147	0.33	0.44	4.53298	0.2078	0.0865	-0.0763	-0.7061	-0.1896	0.1488	-260.359	601.422	322.211	BRAF_Hotspot_Mutants	All_Primaries	Primary_Disease	UV sigture	keratin	hypo-methylated	MIR.type.3	PROT.type.1	OSC.7	0	0	0.0008	0	0.216213
TCGA-EB-A3Y7		Pre	0	TCGA	326	1			Female	75	Stage IIIB	III	WHITE						[Not Available]	0	1661	C3	0.383006	0.41	0.03	2.04686	0.0895	-0.0585	-1.2032	-1.4007	-0.9905	-0.4275	-49.9088	-35.3812	-1106.56	NF1_Any_Mutants	All_Primaries	Primary_Disease	UV sigture	keratin	normal-like	MIR.type.1	PROT.type.1	OSC.2	0	0.00798389	0.00374212	0.0010467	0.0154601
TCGA-EB-A41A		Pre	0	TCGA	262	0			Male	79	Stage IIC	I/II	WHITE						[Not Available]	0	1368	C1	0.085965	0.09	0.01	9.461	0.1816	0.1095	-1.018	-0.8354	-1.0144	-0.2383	-838.562	767.323	-4027.46	NF1_Any_Mutants	All_Primaries	Primary_Disease	UV sigture	keratin	CpG island-methylated	MIR.type.3	-	OSC.2	0	0	0.144325	0	0.161796
TCGA-EB-A41B		Pre	0	TCGA	291	0			Female	65	Stage IIC	I/II	WHITE						[Not Available]	0	1510	C4	0.106486	0.12	0.13	0.133097	0.0675	0.104	-0.6032	-0.6586	-0.9469	-0.5724	-817.468	-230.278	-3044.58	RAS_Hotspot_Mutants	All_Primaries	Primary_Disease	UV sigture	keratin	hypo-methylated	MIR.type.3	-	OSC.3	0	0	0.0101411	0.00599233	0.428036
TCGA-EB-A42Y		Pre	0	TCGA	721	1			Female	62	Stage IIC	I/II	ASIAN		Regiol lymph node			721	[Not Available]	1	2396	C2	0.106005	0.11	0.02	4.39234	0.762	0.2295	-0.2857	-1.2715	1.2974	-0.0328	-595.033	853.608	-3348.78	Triple_WT	All_Primaries	Primary_Disease	not UV	keratin	hyper-methylated	MIR.type.3	-	OSC.6	0	0.00698502	0	0.00190326	0.141702
TCGA-EB-A42Z		Pre	0	TCGA	441	0			Male	38	Stage IIIC	III	ASIAN						[Not Available]	0	1998	C1	0.105112	0.11	0.01	2.25693	0.0194	0.0565	-0.2115	-0.9464	-0.6957	0.2321	208.577	303.003	-1213.62	BRAF_Hotspot_Mutants	All_Primaries	Primary_Disease	UV sigture	MITF-low	CpG island-methylated	MIR.type.2	-	OSC.4	0	0	0.090739	0	0.0921324
TCGA-EB-A430		Pre	0	TCGA	0	0			Male	72	Stage IIC	I/II	WHITE						[Not Available]	0	2	C1	0.31394	0.28	0.19	0.432086	0.2554	0.1555	-0.456	0.2574	-0.3586	-0.2566	-644.123	1021.79	-151.506	BRAF_Hotspot_Mutants	All_Primaries	Primary_Disease	UV sigture	immune	normal-like	MIR.type.3	-	OSC.7	0	0	0.001	0.0212615	0.391022
TCGA-EB-A431		Pre	0	TCGA	568	0			Male	23	Stage IIC	I/II	WHITE						[Not Available]	0	2203	C2	0.293611	0.35	0.26	9.83738	0.5012	0.158	-0.5922	-1.167	0.5778	-0.3125	-94.5583	760.528	-2565.75	BRAF_Hotspot_Mutants	All_Primaries	Primary_Disease	UV sigture	keratin	hypo-methylated	MIR.type.3	-	OSC.5	0	0.0873102	0	0	0.0728915
TCGA-EB-A44N		Pre	0	TCGA	205	1			Male	48	Stage IIC	I/II	WHITE		Regiol lymph node|Distant Metastasis|Distant Metastasis	[Not Available]|Bone|Liver	[Not Applicable]|[Not Applicable]|[Not Applicable]	115	[Not Available]	1	170	C1	0.433701	0.06	0.15	6.6653	0.49	0.0555	0.2042	1.1678	0.3468	0.4447	-571.786	887.744	-1925.39	BRAF_Hotspot_Mutants	All_Primaries	Primary_Disease	UV sigture	keratin	normal-like	MIR.type.1	-	OSC.7	0	0.162682	0	0.0353247	0.0986117
TCGA-EB-A44O		Pre	0	TCGA	81	0			Male	58	Stage IIB	I/II	WHITE		Regiol lymph node			60	[Not Available]	1	2240	C1	0.143225	0.2	0.03	4.59468	0.6477	0.148	-0.8395	-1.5962	-0.5627	-0.2306	-1116.74	531.353	-1486.88	RAS_Hotspot_Mutants	All_Primaries	Primary_Disease	UV sigture	keratin	CpG island-methylated	MIR.type.1	-	OSC.3	0	0.0320043	0	0	0.192043
TCGA-EB-A44P		Pre	0	TCGA	741	0			Female	47	Stage IIC	I/II	WHITE						[Not Available]	0	2419	C1	0.211486	0.2	0.08	2.10794	-0.0913	0.0445	-0.7163	-0.7091	0.2801	0.1185	-1138.59	283.386	-3133.79	BRAF_Hotspot_Mutants	All_Primaries	Primary_Disease	UV sigture	keratin	hyper-methylated	MIR.type.4	-	OSC.6	0	0.0722303	0	0.0059448	0.229427
TCGA-EB-A44Q		Pre	0	TCGA	422	0			Female	40	Stage IIIC	III	ASIAN						[Not Available]	0	1952		0.336202	0.36	0.15		0.5415	-0.022	0.9588	1.8057	1.1624	-0.4848	-502.309	530.486	1611.05	RAS_Hotspot_Mutants	All_Metastases	Regiol_Lymph_Node	not UV	immune	CpG island-methylated	MIR.type.2	-	OSC.3	0	0.0442962	0	0.0194094	0.341468
TCGA-EB-A44R		Pre	0	TCGA	315	1			Male	41	Stage IIIB	III	ASIAN						[Not Available]	0	1614		0.264026	0.43	0.05	5.53005	0.2617	0.0715	0.1662	1.1893	-0.3821	-0.0656	-470.988	103.169	-3747.78	RAS_Hotspot_Mutants	All_Metastases	Regiol_Lymph_Node	not UV	keratin	hyper-methylated	MIR.type.4	-	OSC.3	0	0.0110107	0	0.00566628	0.5132
TCGA-EB-A4IQ		Pre	0	TCGA	636	1			Female	31	Stage IIIB	III	ASIAN		Locoregiol Recurrence|Regiol lymph node	[Not Available]|[Not Available]	[Not Applicable]|[Not Applicable]	337	[Not Available]	1	1706	C1	0.242185	0.49	0.24	0.178128	0.0506	0.057	-1.0073	-1.5212	-0.9849	0.1821	-669.983	372.115	-1623.27	Triple_WT	All_Primaries	Primary_Disease	not UV	keratin	hyper-methylated	MIR.type.1	-	OSC.4	0	0.0116189	0	0	0.0414419
TCGA-EB-A4IS		Pre	0	TCGA	774	0			Male	66	Stage IIB	I/II	WHITE						[Not Available]	0	2457	C2	0.439669	0.64	0.1	8.93336	0.2144	0.0005	0.944	2.3238	1.4989	0.3887	-96.728	-48.2545	-2588.47	BRAF_Hotspot_Mutants	All_Primaries	-	UV sigture	immune	hypo-methylated	MIR.type.2	-	OSC.5	0	0.0811162	0.0709613	0.0800709	0.271202
TCGA-EB-A4OY	R	Pre	0	TCGA	977	0			Female	54	Stage IIIB	III	WHITE						[Not Available]	0	2685	C3	0.26521	0.42	0.18	0.28735	-0.23	-0.0275	-0.6254	0.4695	-1.1601	-0.5796	-155.885	-826.308	-195.101	Triple_WT	All_Primaries	-	not UV	keratin	normal-like	MIR.type.4	-	OSC.3	0	0.0153745	0.0153237	0	0.177087
TCGA-EB-A4OZ		Pre	0	TCGA	620	0			Female	30	Stage IIIC	III	WHITE						[Not Available]	0	2264	C2	0.524242	0.77	0.26	0.453699	-0.3383	-0.133	0.4813	1.3967	0.9403	0.5135	387.23	-246.754	-894.651	BRAF_Hotspot_Mutants	All_Primaries	-	not UV	keratin	normal-like	MIR.type.2	-	OSC.7	0	0.0283681	0	0	0.313236
TCGA-EB-A4P0		Pre	0	TCGA	326	1			Male	71	Stage IIC	I/II	WHITE						[Not Available]	0	1661	C3	0.113803	0.2	0.25	0.417169	-0.3724	-0.0165	-0.4568	-0.5388	-0.6342	-0.165	-928.268	125.476	-2881.03	BRAF_Hotspot_Mutants	All_Primaries	-	UV sigture	immune	hypo-methylated	MIR.type.3	-	OSC.4	0	0	0.0767728	0.00541461	0.225246
TCGA-EB-A4XL		Pre	0	TCGA	777	0			Female	45	Stage IIC	I/II	WHITE						[Not Available]	0	2460	C1	0.157476	0.3	0	7.36623	-0.0116	0.003	0.0732	0.4307	0.4528	0.3281	-505.098	736.612	489.674	-	All_Primaries	Primary_Disease	-	keratin	hypo-methylated	MIR.type.3	-	-	0	0.00398288	0	0.0100666	0.230403
TCGA-EB-A51B		Pre	0	TCGA	931	0			Male	42	Stage IIC	I/II	WHITE						[Not Available]	0	2635	C2	0.17089	0.26	0.09	0.413863	0.6513	0.1945	-0.7292	-1.3971	0.3449	-0.2353	-843.329	893.165	-3998.38	-	All_Primaries	-	-	keratin	hyper-methylated	MIR.type.3	-	-	0	0	0.0267198	0.0111612	0.0797273
TCGA-EB-A550	R	Pre	0	TCGA	264	1			Female	64	Stage IIC	I/II	WHITE						[Not Available]	0	1380	C2	0.310338	0.52	0	0.75103	-0.1382	-0.0245	-0.4847	-0.5518	0.7468	0.4844	-674.813	-51.5315	-2107.62	-	All_Primaries	-	-	keratin	normal-like	MIR.type.1	-	-	0	0	0	0.00998604	0.0386072
TCGA-EB-A551		Pre	0	TCGA	590	0			Female	67	Stage IIIC	III	WHITE						[Not Available]	0	2228	C2	0.434078	0.54	0.23	2.37654	0.1373	-0.0335	1.0663	1.7161	0.9586	-0.0995	933.869	609.447	1287.08	RAS_Hotspot_Mutants	All_Primaries	-	UV sigture	immune	hyper-methylated	MIR.type.2	-	OSC.1	0	0	0.0129855	0.027742	0.428387
TCGA-EB-A553	R	Pre	0	TCGA	226	0			Male	51	Stage IIC	I/II	WHITE						[Not Available]	0	1145	C1	0.262798	0.42	0.03	2.03615	0.28	0.023	-0.0493	0.4051	-0.7372	-0.2023	-966.993	156.591	-1666.82	BRAF_Hotspot_Mutants	All_Primaries	Primary_Disease	UV sigture	keratin	CpG island-methylated	-	-	OSC.6	0	0.0977186	0	0.0364432	0.117032
TCGA-EB-A57M	R	Pre	0	TCGA	472	1			Male	45	Stage IIIB	III	ASIAN						[Not Available]	0	2058	C3	0.200827	0.34	0.67	0.997353	-0.5726	-0.1375	0.0721	0.1514	-0.3187	0.6528	-857.908	-259.151	-426.584										0	0.0246675	0	0.0327516	0.0158299
TCGA-EB-A5FP	NR	Pre	0	TCGA	454	1			Female	54	Stage IV	IV	WHITE		Regiol lymph node|Distant Metastasis	[Not Available]|Lung	[Not Applicable]|[Not Applicable]	24	[Not Available]	1	1235	C1	0.0919957	0.23	0.18	2.53762	0.8553	0.164	-1.4753	-2.6147	-0.5997	-0.1928	-496.78	1567.37	-2118.2	-	All_Primaries	Primary_Disease	-	keratin	hyper-methylated	MIR.type.3	-	-	0	0	0.0289089	0.0174576	0.084341
TCGA-EB-A5KH	R	Pre	0	TCGA	619	1			Male	44	Stage III	III	ASIAN						[Not Available]	0	2262		0.0666063	0.1	0.11	3.4297	-0.2072	-0.2045	-1.0157	-0.3573	-2.1811	-0.0915	-1602.12	421.492	-1596.22	-	All_Metastases	-	-	keratin	hyper-methylated	MIR.type.4	-	-	0	0.237686	0	0.0135301	0.0666157
TCGA-EB-A5SE		Pre	0	TCGA	401	1			Male	62	Stage IIB	I/II	WHITE		Distant Metastasis	Brain		367	[Not Available]	1	1806	C1	0.0802026	0.11	0.02	5.85565	0.2333	0.0245	-0.8797	-1.0815	-0.9878	-0.0341	-1347.61	795.354	-2634.85										0	0.0303993	0	0.00872966	0.282041
TCGA-EB-A5SF		Pre	0	TCGA	369	1			Female	67	Stage IIC	I/II	WHITE						[Not Available]	0	1813	C3	0.157804	0.39	0.01	2.59049	-0.8547	-0.264	-0.9815	-1.8594	-1.539	0.3942	-1497.96	-621.398	1283.51										0	0.00339257	0.00415408	0	0.0143682
TCGA-EB-A5SG		Pre	0	TCGA	2076	0			Female	46	[Not Available]	Not Available	WHITE		Locoregiol Recurrence			1372	[Not Available]	1	394		0.691773	0.77	0.41	25.8514	0.152	0.0695	1.5773	2.8879	0.4767	-0.1179	1359.23	378.916	932.384										0	0.00515174	0	0.0183392	0.458576
TCGA-EB-A5SH	R	Pre	0	TCGA	1643	0			Female	49	Stage III	III	WHITE		Locoregiol Recurrence			1065	[Not Available]	1	77		0.173543	0.27	0.21	16.0085	-0.481	-0.2995	-0.5586	0.9161	-1.8914	-0.4411	-944.801	-367.136	-1382.53										0	0.182966	0	0.0706205	0.226472
TCGA-EB-A5UL	R	Pre	0	TCGA	891	0			Male	60	Stage III	III	WHITE						[Not Available]	0	2589		0.425998	0.54	0.37	19.4573	0.892	0.283	0.3323	1.6789	0.3383	-0.2819	113.687	552.185	-360.128										0	0	0.0658263	0.0463481	0.354506
TCGA-EB-A5UM		Pre	0	TCGA	779	0			Female	37	Stage IIC	I/II	WHITE						[Not Available]	0	2463	C3	0.235292	0.28	0.07	6.46886	-0.2972	-0.035	0.1609	1.5252	-0.2898	-0.1426	-1174.84	-146.919	-2683.46										0	0.0414952	0.0130014	0	0.329705
TCGA-EB-A5UN		Pre	0	TCGA	1792	0			Male	38	Stage IIC	I/II	WHITE		Distant Metastasis	Brain		1689	[Not Available]	1	697		0.479895	0.56	0.06	7.34813	-0.1853	-0.03	-0.4103	-0.9433	-0.2477	0.1673	64.33	442.811	-1812.18										0	0.00716021	0	0.0297576	0.19676
TCGA-EB-A5VU		Pre	0	TCGA	321	1			Male	45	Stage IIIB	III	ASIAN		Locoregiol Recurrence			217	[Not Available]	1	1079	C1	0.132323	0.36	0.01	0.65129	0.7805	0.295	-0.1929	-1.1483	-0.6212	0.1628	-825.966	1055.87	-1981.98										0	0.0129647	0.00975726	0	0.0712765
TCGA-EB-A5VV		Pre	0	TCGA	214	0			Female	63	Stage IIIB	III	WHITE						[Not Available]	0	1058		0.898817	0.64	0		-0.5946	-0.1635	1.7101	3.9173	0.4559	-0.6112	-667.824	-1124.27	-2307.08										0	0.317302	0.112029	0.0326231	0.203067
TCGA-EB-A6L9		Pre	0	TCGA	1109	0			Male	44	Stage IIIC	III	ASIAN						[Not Available]	0	125		0.687563	0.88	0.28	4.9869	-0.1386	0.1015	0.9704	2.9185	1.043	0.0693	798.679	-52.1078	-434.045										0	0.148307	0	0.145215	0.191591
TCGA-EB-A6QY	R	Pre	0	TCGA	382	0			Male	60	Stage IIC	I/II	WHITE		Regiol lymph node			36	[Not Available]	1	1779	C1	0.289884	0.58	0.05	2.83519	0.6352	0.255	-0.6582	-1.0401	-0.6951	-0.223	-175.015	764.415	-1423.98										0	0	0.00719692	0.246321	0.133667
TCGA-EB-A6QZ	R	Pre	0	TCGA	352	1			Female	65	Stage IIA	Not Available	WHITE		Regiol lymph node|Distant Metastasis	[Not Available]|Brain	[Not Applicable]|[Not Applicable]	129	[Not Available]	1	313	C4	0.0911689	0.1	0.45	0.956029	0.4315	0.21	-0.4735	-1.94	-0.6513	0.1698	-965.275	545.803	-2052.44										0	0.00698686	0.0361951	0.00679141	0.0613971
TCGA-EB-A6R0	R	Pre	0	TCGA	608	1			Female	47	Stage IIC	I/II	WHITE						[Not Available]	0	2250	C2	0.252825	0.36	0.11	16.3599	0.6875	0.1615	0.3025	0.4471	2.3704	-0.185	-114.912	854.538	-3174.5										0	0.0021085	0	0.00107172	0.522243
TCGA-EB-A82B		Pre	0	TCGA	390	0			Female	47	Stage III	III	ASIAN						[Not Available]	0	1876	C2	0.328243	0.54	0.18	3.28298	0.5407	0.287	0.3423	1.1624	0.2191	-0.014	94.0589	876.789	-2529.98										0	0.0465259	0.0211516	0.00803792	0.0751421
TCGA-EB-A82C		Pre	0	TCGA	17	0			Female	59	Stage IIC	I/II	ASIAN						[Not Available]	0	707	C1	0.0871021	0.16	0.22	1.47137	0.3871	0.1425	-1.5095	-1.7874	-0.3944	0.0713	-1508.49	1302.24	-2988.89										0	0.0833158	0	0.0396896	0.0427489
TCGA-EB-A85I		Pre	0	TCGA	362	0			Male	55	Stage IIC	I/II	WHITE						[Not Available]	0	1787	C2	0.409644	0.48	0	3.06536	0.2054	0.174	0.0937	0.5991	1.0563	0.1739	-441.917	330.687	-3571.63										0	0.00721481	0	0	0.535778
TCGA-EB-A85J	R	Pre	0	TCGA	360	0			Female	55	Stage IIB	I/II	WHITE		Regiol lymph node			138	[Not Available]	1	402	C2	0.380686	0.45	0.1	0.883138	0.3734	0.15	0.6965	1.9579	-0.482	-0.4277	165.001	535.32	-2240.08										0	0.0201338	0	0.00637246	0.366539
TCGA-EB-A97M		Pre	0	TCGA	414	0			Male	55	Stage IIC	I/II	WHITE						[Not Available]	0	1939	C3	0.120848	0.22	0.23	0.981939	0.1785	0.0105	0.0142	0.0579	-0.3355	-0.1961	-41.343	-420.213	-1228.41										0	0.00631104	0.00189155	0	0.307867
TCGA-EE-A17X		Pre	0	TCGA	907	1			Male	43	Stage IA	I/II	WHITE		Locoregiol Recurrence			531	[Not Available]	1	2154		0.113273	0.07	0	1.21257	0.7801	0.085	-0.5093	-0.9665	-1.2277	-0.4489	92.3912	645.539	-1405.68	RAS_Hotspot_Mutants	All_Metastases	Regiol_Lymph_Node	UV sigture	keratin	hypo-methylated	MIR.type.1	PROT.type.2	OSC.2	0	0.0239114	0	0	0.0957379
TCGA-EE-A17Y		Pre	0	TCGA	828	1			Male	58	Stage IIIB	III	ASIAN		Regiol lymph node			317	[Not Available]	1	1620		0.33946	0.46	0.26	1.14083	0.35	0.133	-0.7738	-2.1009	-1.0596	0.5067	-771.039	652.107	1387.65	BRAF_Hotspot_Mutants	All_Metastases	Regiol_Skin_or_Soft_Tissue	UV sigture	MITF-low	hypo-methylated	MIR.type.2	-	OSC.4	0	0	0.00853337	0.00199894	0
TCGA-EE-A17Z		Pre	0	TCGA	263	1			Male	46	Stage IIB	I/II	WHITE		Regiol lymph node			138	[Not Available]	1	402		0.0654493	0.01	0	3.00744	0.7788	0.1715	-1.3376	-1.6058	-2.1897	-0.2026	-789.307	1114.82	-3006.99	Triple_WT	All_Metastases	Regiol_Lymph_Node	not UV	keratin	hyper-methylated	MIR.type.3	-	OSC.6	0	0.110754	0	0.0004	0.14178
TCGA-EE-A180	NR	Pre	0	TCGA	2889	1			Male	58	Stage III	III	WHITE		New primary melanoma			850	[Not Available]	1	2545		0.0529721	0.08	0.05	0.751088	0.254	-0.0555	-0.6174	-1.1952	1.4208	-0.0173	-644.631	485.842	-1912.73	NF1_Any_Mutants	All_Metastases	Distant_Metastases	UV sigture	keratin	CpG island-methylated	MIR.type.3	PROT.type.2	OSC.2	0	0.00938583	0	0	0.221436
TCGA-EE-A181		Pre	0	TCGA	1026	1			Female	71	Stage II	I/II	WHITE		Locoregiol Recurrence			788	[Not Available]	1	2473		0.348791	0.46	0.25	20.5352	0.6026	0.089	0.7953	1.8583	0.6503	-0.5217	-480.962	592.55	-1384.23	NF1_Any_Mutants	All_Metastases	Regiol_Lymph_Node	UV sigture	immune	hypo-methylated	MIR.type.2	PROT.type.4	OSC.5	0	0.00794998	0.0320943	0.0166711	0.300517
TCGA-EE-A182	R	Pre	0	TCGA	447	1			Female	73	Stage IIIC	III	WHITE		Locoregiol Recurrence			270	[Not Available]	1	1414		0.309578	0.38	0.04	0.727947	-0.3474	-0.369	-0.0891	-0.0208	-1.436	0.278	-769.356	-961.221	-595.155	NF1_Any_Mutants	All_Metastases	Distant_Metastases	UV sigture	keratin	CpG island-methylated	MIR.type.1	PROT.type.1	OSC.2	0	0.0422533	0	0	0.18916
TCGA-EE-A183		Pre	0	TCGA					Male	37	Stage 0	I/II	WHITE		Locoregiol Recurrence			450	[Not Available]		1		0.486866	0.66	0.04	2.11955	0.1293	-0.1065	0.5945	2.2396	-0.3418	0.13	-581.599	-390.115	-197.762	BRAF_Hotspot_Mutants	All_Metastases	Regiol_Lymph_Node	UV sigture	immune	hyper-methylated	MIR.type.1	-	OSC.7	0	0.0745524	0.0848534	0.0387801	0.243497
TCGA-EE-A184		Pre	0	TCGA	2073	1			Male	61	Stage IB	I/II	WHITE		Distant Metastasis	Other, Specify	Right lower arm	1309	[Not Available]	1	332		0.166648	0.15	0.13	2.87511	-0.0965	-0.1055	0.1859	0.7559	-0.8549	-0.1175	-386.664	371.277	-1442.56	RAS_Hotspot_Mutants	All_Metastases	Distant_Metastases	not UV	immune	CpG island-methylated	MIR.type.3	PROT.type.4	OSC.3	0	0.0006	0	0.00310149	0.266881
TCGA-EE-A185	NR	Pre	0	TCGA	151	1			Female	44	Stage IIIC	III	WHITE		Regiol lymph node			85	[Not Available]	1	2544		0.0669192	0.07	0.1	1.73483	0.1561	-0.0075	-1.7574	-2.8371	-1.5631	-0.2404	-1184.8	153.8	-150.856	RAS_Hotspot_Mutants	All_Metastases	Regiol_Lymph_Node	UV sigture	keratin	CpG island-methylated	MIR.type.3	PROT.type.2	OSC.3	0	0.0748327	0	0.0589963	0
TCGA-EE-A20B		Pre	0	TCGA	4070	0			Female	55	Stage II	I/II	WHITE						[Not Available]	0	1922		0.257309	0.25	0.22	1.41508	-0.2472	-0.0925	0.4873	0.9178	-0.4421	0.5658	-152.824	-698.879	-2362.34	BRAF_Hotspot_Mutants	All_Metastases	Regiol_Skin_or_Soft_Tissue	UV sigture	immune	hypo-methylated	MIR.type.4	-	OSC.5	0	0.0201015	0	0	0.330279
TCGA-EE-A20C		Pre	0	TCGA					Male	48	Stage 0	I/II	WHITE		New primary melanoma			142	[Not Available]		1		0.0515715	0.07	0.06	0.017217	-0.0784	-0.045	-0.7041	-2.5368	0.3188	-0.4667	-392.671	602.162	-3042.6	RAS_Hotspot_Mutants	All_Metastases	Distant_Metastases	UV sigture	MITF-low	CpG island-methylated	MIR.type.4	PROT.type.3	OSC.2	0	0	0	0	0
TCGA-EE-A20F		Pre	0	TCGA	2785	0			Male	42	Stage I	I/II	WHITE						[Not Available]	0	1451		0.317466	0.3	0.05	15.7877	0.636	0.287	0.5324	1.0342	0.4	0.0547	393.788	873.051	-2639.74	BRAF_Hotspot_Mutants	All_Metastases	Regiol_Lymph_Node	UV sigture	immune	hypo-methylated	MIR.type.2	PROT.type.1	OSC.4	0	0.0124601	0	0.046132	0.234243
TCGA-EE-A20H		Pre	0	TCGA	5118	1			Male	45	Stage I	I/II	WHITE		Regiol lymph node			4667	[Not Available]	1	2046		0.0626443	0.05	0.06	2.03947	1.0755	0.2675	-0.8376	-1.6255	-0.5718	0.0403	-572.817	1031.84	-1765.06	BRAF_Hotspot_Mutants	All_Metastases	Distant_Metastases	UV sigture	MITF-low	hyper-methylated	MIR.type.4	-	OSC.4	0	0	0.00412599	0.0002	0.095973
TCGA-EE-A20I		Pre	0	TCGA	412	1			Male	68	Stage IV	IV	WHITE		Distant Metastasis	Brain		53	[Not Available]	1	2152		0.237966	0.22	0.01	1.63112	0.3222	-0.0045	-0.1346	0.0926	1.1016	-0.0367	80.9508	888.359	-120.481	Triple_WT	All_Metastases	Regiol_Skin_or_Soft_Tissue	not UV	immune	hypo-methylated	MIR.type.2	-	-	0	0.00923121	0	0.00856261	0.233536
TCGA-EE-A29A		Pre	0	TCGA	1927	1			Male	57	Stage IIIA	III	WHITE		Locoregiol Recurrence			867	[Not Available]	1	2564		0.0658564	0.19	0.04	0.870616	0.0938	-0.0285	-0.9749	-2.2157	0.0923	0.4481	-390.869	410.45	-2419.88	BRAF_Hotspot_Mutants	All_Metastases	Distant_Metastases	UV sigture	MITF-low	CpG island-methylated	MIR.type.1	-	OSC.7	0	0.00204854	0.00340606	0	0
TCGA-EE-A29B		Pre	0	TCGA	2588	1			Male	56	Stage IIB	I/II	WHITE		New primary melanoma			490	[Not Available]	1	2089		0.0491101	0.03	0	0.403598	0.4278	0	-0.2644	-1.2229	-0.4829	-0.4723	-1422.54	1333.7	-2180.75	RAS_Hotspot_Mutants	All_Metastases	Distant_Metastases	UV sigture	keratin	CpG island-methylated	MIR.type.3	PROT.type.4	OSC.3	0	0.0003	0	0	0.0672955
TCGA-EE-A29C		Pre	0	TCGA	2402	1			Male	9	Stage IB	I/II	WHITE		Regiol lymph node			204	[Not Available]	1	989		0.30679	0.38	0.14	7.77787	0.6359	0.187	-0.0259	-0.0871	-0.3599	0.2788	-690.383	387.029	-1536.8	BRAF_Hotspot_Mutants	All_Metastases	Regiol_Lymph_Node	UV sigture	immune	normal-like	MIR.type.2	PROT.type.1	OSC.7	0	0.0790433	0	0.0190898	0.029225
TCGA-EE-A29D		Pre	0	TCGA	425	1			Male	76	Stage IIIC	III	WHITE						[Not Available]	0	1958		0.0671469	0.05	0.28	0.00919685	0.3929	-0.002	-0.5656	-1.4572	-0.5856	0.038	-926.968	733.646	-559.549	Triple_WT	All_Metastases	Regiol_Lymph_Node	UV sigture	keratin	CpG island-methylated	MIR.type.2	-	OSC.3	0	0.0008	0.0080035	0.00145201	0.00270102
TCGA-EE-A29E		Pre	0	TCGA	1940	0			Male	43	Stage IIIB	III	WHITE						[Not Available]	0	909		0.171342	0.14	0.16	13.8977	0.6768	0.141	-1.1199	-2.2421	-1.1905	-0.4598	-366.118	1260.39	-1411.33	BRAF_Hotspot_Mutants	All_Metastases	Regiol_Lymph_Node	UV sigture	keratin	normal-like	MIR.type.3	PROT.type.1	OSC.5	0	0.0299088	0	0	0
TCGA-EE-A29G		Pre	0	TCGA	2192	1			Male	42	Stage IIIA	III	WHITE		Locoregiol Recurrence			726	[Not Available]	1	2402		0.235888	0.79	0.14	0.623813	0.0177	-0.1175	0.3418	0.2562	-0.1454	0.2328	-303.313	728.338	820.049	RAS_Hotspot_Mutants	All_Metastases	Regiol_Skin_or_Soft_Tissue	UV sigture	keratin	hyper-methylated	MIR.type.1	PROT.type.1	OSC.1	0	0.00397092	0	0	0.0452019
TCGA-EE-A29H		Pre	0	TCGA	1966	0			Female	48	Stage IA	I/II	WHITE		Distant Metastasis|Locoregiol Recurrence	Other, Specify|[Not Available]	Perihilar lymph nodes|[Not Applicable]	1231	[Not Available]	1	253		0.199932	0.14	0.04	6.71345	0.4214	0.1015	0.1215	1	-0.2632	0.0188	-765.731	1035.23	-1856.53	BRAF_Hotspot_Mutants	All_Metastases	Regiol_Lymph_Node	UV sigture	immune	hyper-methylated	MIR.type.3	PROT.type.4	OSC.4	0	0.171113	0	0	0.104175
TCGA-EE-A29L		Pre	0	TCGA	79	1			Male	67	Stage IIIC	III	WHITE		Distant Metastasis	Brain		55	[Not Available]	1	2180		0.0536476	0.03	0.21	1.37524	0.6834	0.139	-2.0445	-1.8542	-1.3978	-0.8547	-1172.9	1146.9	-1497.31	RAS_Hotspot_Mutants	All_Metastases	Regiol_Lymph_Node	UV sigture	keratin	CpG island-methylated	MIR.type.3	PROT.type.2	OSC.2	0	0.0619091	0	0.00811508	0.0810669
TCGA-EE-A29M		Pre	0	TCGA	1729	0			Female	22	Stage IB	I/II	WHITE						[Not Available]	0	732		0.436416	0.42	0.3	6.87868	0.609	0.16	0.2546	1.4008	0.8403	-0.5508	142.369	1246.98	-669.782	BRAF_Hotspot_Mutants	All_Metastases	Regiol_Lymph_Node	UV sigture	immune	normal-like	MIR.type.3	PROT.type.4	OSC.5	0	0.0490244	0.0164138	0.0498216	0.286833
TCGA-EE-A29N		Pre	0	TCGA	566	1			Male	67	I/II NOS	I/II	WHITE		New primary melanoma			478	[Not Available]	1	2067		0.497847	0.59	0.31	4.75188	0.6959	0.18	0.8598	1.8551	0.1672	0.1904	793.647	1180.61	-1379.74	NF1_Any_Mutants	All_Metastases	Regiol_Lymph_Node	UV sigture	immune	hyper-methylated	MIR.type.2	PROT.type.4	OSC.2	0	0.0324256	0.0649991	0	0.112461
TCGA-EE-A29P		Pre	0	TCGA	1716	0			Female	62	Stage IIC	I/II	WHITE		Distant Metastasis	Lung		1668	[Not Available]	1	679		0.364801	0.57	0.44	7.62919	0.4347	-0.0195	1.2831	1.8436	1.1638	0.0704	216.724	782.748	-2605.4	BRAF_Hotspot_Mutants	All_Metastases	Regiol_Lymph_Node	UV sigture	immune	CpG island-methylated	MIR.type.3	PROT.type.3	OSC.6	0	0.0139285	0	0.00506807	0.500774
TCGA-EE-A29Q		Pre	0	TCGA	2030	1			Female	59	Stage IIB	I/II	WHITE		Regiol lymph node|Distant Metastasis|Distant Metastasis|Distant Metastasis|Distant Metastasis|Locoregiol Recurrence|Distant Metastasis	[Not Available]|Other, Specify|Other, Specify|Lung|Bone|[Not Available]|Brain	[Not Applicable]|mediastil lymph nodes|adrel|[Not Applicable]|[Not Applicable]|[Not Applicable]|[Not Applicable]	1256	[Not Available]	1	279		0.146468	0.14	0.41	3.63217	0.1431	0.0775	-0.518	-0.8489	-0.0526	-0.2791	-494.8	521.582	-1882.45	RAS_Hotspot_Mutants	All_Metastases	Regiol_Skin_or_Soft_Tissue	UV sigture	MITF-low	hypo-methylated	MIR.type.4	-	OSC.3	0	0.0461881	0	0	0.0534959
TCGA-EE-A29R		Pre	0	TCGA	440	0			Female	37	Stage IIIC	III	WHITE		Distant Metastasis	Lung		426	[Not Available]	1	1961		0.0625754	0.02	0.33	3.39883	0.0071	0.073	-0.6071	-1.0356	-1.1793	0.3374	-146.026	3.31983	-1615.87	RAS_Hotspot_Mutants	All_Metastases	Regiol_Lymph_Node	UV sigture	MITF-low	hyper-methylated	MIR.type.3	PROT.type.1	OSC.3	0	0.0472439	0	0	0.133278
TCGA-EE-A29S		Pre	0	TCGA	1864	1			Male	68	Stage IIA	Not Available	WHITE		Locoregiol Recurrence			1418	[Not Available]	1	439		0.277171	0.31	0.01	1.54412	0.2268	0.114	0.0638	0.3784	-0.8317	0.2198	-666.99	1398.83	1148.89	RAS_Hotspot_Mutants	All_Metastases	Regiol_Lymph_Node	UV sigture	immune	CpG island-methylated	MIR.type.4	PROT.type.3	OSC.1	0	0.0137379	0	0.00518229	0.0942756
TCGA-EE-A29T		Pre	0	TCGA	11252	0			Female	40	[Not Available]	Not Available	WHITE		Regiol lymph node			7483	[Not Available]	1	2427		0.397431	0.6	0.15		-0.1003	-0.0065	0.9977	1.4713	0.0745	0.0426	-102.875	-487.588	-519.184	-	All_Metastases	Regiol_Lymph_Node	-	immune	CpG island-methylated	MIR.type.4	PROT.type.1	-	0	0	0.0502028	0.0395712	0.237207
TCGA-EE-A29V		Pre	0	TCGA	787	1			Male	74	Stage IIIC	III	WHITE		Locoregiol Recurrence			96	[Not Available]	1	2666		0.277988	0.29	0.02	2.05187	0.44	0.1325	-0.9963	-1.5891	-0.6945	-0.0099	-475.366	201.301	-1212.19	RAS_Hotspot_Mutants	All_Metastases	Distant_Metastases	UV sigture	keratin	hypo-methylated	MIR.type.1	PROT.type.1	OSC.2	0	0.0277088	0.0122011	0.0232912	0.0516395
TCGA-EE-A29W		Pre	0	TCGA					Male	31	Stage 0	I/II	WHITE		New primary melanoma			4408	[Not Available]		1		0.0723429	0.36	0.01	0.804726	0.7583	0.096	-0.5952	-1.4293	-1.4874	0.6675	-424.111	1341.56	-3299.4	BRAF_Hotspot_Mutants	All_Metastases	Regiol_Lymph_Node	UV sigture	MITF-low	hyper-methylated	MIR.type.1	PROT.type.1	OSC.4	0	0.0059829	0	0	0.117178
TCGA-EE-A29X	NR	Pre	0	TCGA	545	1			Female	47	Stage IB	I/II	WHITE		Regiol lymph node			391	[Not Available]	1	1877		0.297033	0.26	0.1	7.10448	0.2342	0	0.6393	1.0099	-0.276	0.3759	111.151	626.747	-1370.4	RAS_Hotspot_Mutants	All_Metastases	Regiol_Lymph_Node	UV sigture	immune	hyper-methylated	MIR.type.3	-	OSC.1	0	0.030444	0	0.0597387	0.150445
TCGA-EE-A2A0		Pre	0	TCGA	1424	1			Female	66	Stage IIA	Not Available	WHITE		Distant Metastasis	Other, Specify	Left Inner Canthus	1247	[Not Available]	1	269		0.455618	0.61	0.02	2.24484	0.2849	0.0365	1.2136	1.5066	-0.1056	0.2764	306.602	1519.93	-3500.42	Triple_WT	All_Metastases	Regiol_Lymph_Node	UV sigture	immune	hyper-methylated	MIR.type.4	PROT.type.1	OSC.7	0	0.0163724	0.0483828	0.0738908	0.142895
TCGA-EE-A2A1		Pre	0	TCGA	3527	0			Male	35	Stage IB	I/II	WHITE		Regiol lymph node			3488	[Not Available]	1	1748		0.537021	0.67	0.16	6.13672	-0.2186	-0.122	1.1328	2.1901	0.7804	0.3039	84.1185	407.393	-1387.39	RAS_Hotspot_Mutants	All_Metastases	Regiol_Lymph_Node	UV sigture	immune	normal-like	MIR.type.1	-	OSC.3	0	0.104346	0	0.0841785	0.185771
TCGA-EE-A2A2		Pre	0	TCGA	1814	0			Male	60	Stage IIIC	III	WHITE						[Not Available]	0	803		0.203353	0.17	0.33	22.7913	0.9517	0.3045	0.2479	1.2969	-0.1424	-0.1759	-1182.13	1334.48	-1773.09	RAS_Hotspot_Mutants	All_Metastases	Regiol_Lymph_Node	UV sigture	immune	hypo-methylated	MIR.type.4	PROT.type.3	OSC.2	0	0.135466	0.0408113	0.0674698	0.122557
TCGA-EE-A2A5		Pre	0	TCGA	1195	1			Male	32	Stage IB	I/II	WHITE		Regiol lymph node			1028	[Not Available]	1	36		0.116566	0.15	0.51	0.978953	0.7482	0.1515	-0.2592	-0.8209	-0.7223	0.1964	-532.16	823.699	-2668.97	RAS_Hotspot_Mutants	All_Metastases	Regiol_Skin_or_Soft_Tissue	UV sigture	MITF-low	CpG island-methylated	MIR.type.4	-	OSC.3	0	0.0404196	0	0.00198226	0.0319415
TCGA-EE-A2A6		Pre	0	TCGA	2620	0			Male	32	Stage IA	I/II	WHITE		New primary melanoma			1505	[Not Available]	1	530		0.386222			11.025	0.4099	0.1255	0.5921	1.9442	0.047	-0.0708	-624.65	794.851	-3204.13	BRAF_Hotspot_Mutants	All_Metastases	Regiol_Lymph_Node	UV sigture	immune	hyper-methylated	MIR.type.2	PROT.type.2	OSC.5	0	0.0235207	0.0596446	0.0355222	0.397293
TCGA-EE-A2GB		Pre	0	TCGA	1803	0			Male	40	Stage IIIB	III	WHITE						[Not Available]	0	796		0.123411	0.16	0.12	1.5229	0.1663	0.0085	-0.2945	-0.3562	0.0509	-0.3088	-791.181	578.56	-1950.23	BRAF_Hotspot_Mutants	All_Metastases	Regiol_Lymph_Node	UV sigture	keratin	hypo-methylated	MIR.type.3	-	OSC.4	0	0.0226614	0	0.0009	0.0998705
TCGA-EE-A2GC		Pre	0	TCGA	2051	0			Male	71	Stage IIB	I/II	WHITE						[Not Available]	0	999		0.263637	0.4	0.05		0.1084	-0.048	0.814	1.31	0.4395	-0.0125	697.092	655.677	-1894.27	NF1_Any_Mutants	All_Metastases	Regiol_Lymph_Node	UV sigture	immune	hyper-methylated	MIR.type.3	PROT.type.2	OSC.5	0	0.0273123	0	0.051364	0.417335
TCGA-EE-A2GD		Pre	0	TCGA	10346	1			Female	47	Stage IIB	I/II	WHITE		Locoregiol Recurrence			3689	[Not Available]	1	1812		0.424687	0.57	0.2	2.44334	-0.7429	-0.164	0.5464	-0.1081	-0.5513	0.7201	-597.414	-171.772	-1576.82	RAS_Hotspot_Mutants	All_Metastases	Regiol_Skin_or_Soft_Tissue	UV sigture	immune	CpG island-methylated	MIR.type.4	-	OSC.2	0	0.00687961	0	0.0002	0.0206016
TCGA-EE-A2GE		Pre	0	TCGA	5286	0			Male	33	Stage I	I/II	WHITE		[Not Available]|[Not Available]	[Not Available]|[Not Available]	[Not Applicable]|[Not Applicable]	5276	[Not Available]	1	2147		0.511505	0.78	0.25		-0.0456	-0.0515	1.3812	2.2535	0.3738	0.7234	484.344	194.421	-2351.55	BRAF_Hotspot_Mutants	All_Metastases	Regiol_Lymph_Node	UV sigture	immune	hypo-methylated	MIR.type.4	-	OSC.7	0	0	0	0.0286099	0.351331
TCGA-EE-A2GH		Pre	0	TCGA	6699	0			Male	23	Stage I	I/II	WHITE						[Not Available]	0	2327		0.553862	0.67	0.08	26.3852	0.1442	0.068	1.2991	2.3836	0.0631	0.3603	366.291	1108.41	-1204.76	BRAF_Hotspot_Mutants	All_Metastases	Regiol_Lymph_Node	UV sigture	immune	hypo-methylated	MIR.type.2	PROT.type.2	OSC.4	0	0	0.0250404	0.051194	0.426137
TCGA-EE-A2GI		Pre	0	TCGA	1482	0			Male	28	Stage IA	I/II	WHITE						[Not Available]	0	506		0.336273	0.46	0.17	13.4836	0.5924	0.2235	0.5874	1.8134	1.0082	-0.0148	197.756	659.039	334.189	NF1_Any_Mutants	All_Metastases	Regiol_Lymph_Node	UV sigture	immune	hypo-methylated	MIR.type.1	PROT.type.2	OSC.2	0	0.0527003	0	0.0623225	0.272976
TCGA-EE-A2GJ		Pre	0	TCGA	3266	1			Male	72	Stage IA	I/II	WHITE		New primary melanoma			733	[Not Available]	1	2410		0.320464	0.3	0.09	11.4369	0.3349	-0.0785	0.9323	0.6561	0.3548	-0.0883	-346.904	911.824	-2182.07	RAS_Hotspot_Mutants	All_Metastases	Regiol_Lymph_Node	UV sigture	immune	CpG island-methylated	MIR.type.2	-	OSC.2	0	0.00233528	0	0	0.307731
TCGA-EE-A2GK		Pre	0	TCGA	1665	0			Female	35	Stage I	I/II	WHITE					1498	[Not Available]	1	522		0.901376	0.01	0		0.1598	-0.111	1.7338	3.7707	0.052	-0.3008	-769.062	-647.239	-1381.93	Triple_WT	All_Metastases	Regiol_Lymph_Node	not UV	immune	normal-like	MIR.type.1	PROT.type.3	-	0	0.412033	0.0349244	0.0329429	0.118915
TCGA-EE-A2GL		Pre	0	TCGA	2423	0			Female	29	Stage IIA	Not Available	WHITE		Distant Metastasis|Distant Metastasis|Distant Metastasis|Distant Metastasis|Distant Metastasis|Distant Metastasis|Distant Metastasis|Distant Metastasis|Distant Metastasis|Distant Metastasis	Lung|Other, Specify|Bone|Other, Specify|Other, Specify|Other, Specify|Other, Specify|Other, Specify|Other, Specify|Other, Specify	[Not Applicable]|right anterior chest - skin and soft tissue|[Not Applicable]|LN left neck|left head - skin and soft tissue|spleen|left anterior chest - skin and soft tissue|LN right neck|right head - skin and soft tissue|LN left pelvic	2329	[Not Available]	1	1188		0.580187	0.74	0.02		-0.0221	-0.0005	0.901	2.5893	-0.4214	-0.0116	-291.857	97.2183	-2356.18	RAS_Hotspot_Mutants	All_Metastases	Regiol_Lymph_Node	UV sigture	immune	hyper-methylated	MIR.type.1	PROT.type.3	OSC.3	0	0.280864	0.0951975	0.0409276	0.167064
TCGA-EE-A2GM		Pre	0	TCGA	2296	0			Female	59	Stage IIC	I/II	WHITE		Locoregiol Recurrence			1218	[Not Available]	1	238		0.109826	0.14	0	1.04035	0.0265	0	-0.3952	-1.0364	-1.139	-0.1323	-864.548	853.926	-2254.73	RAS_Hotspot_Mutants	All_Metastases	Regiol_Skin_or_Soft_Tissue	UV sigture	MITF-low	CpG island-methylated	MIR.type.3	-	OSC.3	0	0	0.0270283	0.00256568	0.073621
TCGA-EE-A2GN	NR	Pre	0	TCGA	3106	1			Male	56	Stage IIA	Not Available	WHITE		Distant Metastasis	Other, Specify	adrel gland	2422	[Not Available]	1	1248		0.123267	0.11	0.27	0.411931	0.1318	-0.0525	-0.1853	-0.5342	-0.7066	0.3602	-987.745	493.283	-1619.92	RAS_Hotspot_Mutants	All_Metastases	Regiol_Skin_or_Soft_Tissue	UV sigture	keratin	hyper-methylated	MIR.type.4	-	OSC.3	0	0.0350863	0	0.00222084	0.0443899
TCGA-EE-A2GO		Pre	0	TCGA	3857	0			Female	55	Stage II	I/II	WHITE		Regiol lymph node			2216	[Not Available]	1	1114		0.0451041	0.07	0.04	0.834622	0.0884	0.0245	-0.8371	-2.0244	-1.6315	0.4439	443.257	200.581	235.723	RAS_Hotspot_Mutants	All_Metastases	Regiol_Skin_or_Soft_Tissue	UV sigture	MITF-low	hyper-methylated	MIR.type.1	-	OSC.2	0	0.00386424	0	0.00367927	0.0173289
TCGA-EE-A2GP		Pre	0	TCGA	423	1			Male	69	Stage IIIB	III	WHITE		Distant Metastasis	Lung		251	[Not Available]	1	1302		0.26172	0.37	0.11	2.31871	0.6083	0.1005	0.5684	-0.0902	-0.0565	0.4645	-502.576	1043.78	-2259.86	RAS_Hotspot_Mutants	All_Metastases	Regiol_Skin_or_Soft_Tissue	UV sigture	MITF-low	hyper-methylated	MIR.type.3	PROT.type.1	OSC.3	0	0.00693754	0.0005	0	0.0338386
TCGA-EE-A2GR		Pre	0	TCGA	1301	1			Male	67	Stage II	I/II	WHITE						[Not Available]	1	324		0.0216083	0.02	0.06	1.31234	0.2272	0.0395	-1.5681	-2.4804	-1.3011	-0.1559	-1999.65	711.672	-1425.23	NF1_Any_Mutants	All_Metastases	Regiol_Skin_or_Soft_Tissue	UV sigture	keratin	hyper-methylated	MIR.type.3	PROT.type.1	OSC.2	0	0.00755071	0.0530292	0.0125039	0
TCGA-EE-A2GS	NR	Pre	0	TCGA	2470	1			Female	17	Stage IB	I/II	WHITE		Distant Metastasis	Other, Specify	right buttock	1565	[Not Available]	1	589		0.0987664	0.07	0	0.89807	0.5632	0.17	0.2248	-0.1434	1.6143	0.1385	-837.861	223.79	-3420.56	BRAF_Hotspot_Mutants	All_Metastases	Regiol_Lymph_Node	UV sigture	MITF-low	hypo-methylated	MIR.type.4	PROT.type.2	OSC.6	0	0.00924944	0	0	0.059571
TCGA-EE-A2GT		Pre	0	TCGA	1365	0			Male	66	Stage IIA	Not Available	WHITE		Locoregiol Recurrence			281	[Not Available]	1	1462		0.518535	0.57	0.03	30.813	-0.1099	-0.063	0.8313	2.3824	-0.4865	-0.0691	-830.975	-370.027	2294.78	BRAF_Hotspot_Mutants	All_Metastases	Regiol_Lymph_Node	UV sigture	immune	normal-like	MIR.type.1	PROT.type.4	OSC.5	0	0.217134	0	0.0659567	0.184576
TCGA-EE-A2GU		Pre	0	TCGA	2884	0			Female	54	Stage IA	I/II	WHITE						[Not Available]	0	1497		0.345931	0.39	0.01	14.3057	0.5114	-0.01	0.5918	1.2508	0.377	-0.7603	122.85	934.981	-2425.98	RAS_Hotspot_Mutants	All_Metastases	Regiol_Lymph_Node	UV sigture	immune	CpG island-methylated	MIR.type.3	PROT.type.3	OSC.1	0	0.0152879	0	0.00723803	0.556179
TCGA-EE-A2M5		Pre	0	TCGA	659	1			Male	38	Stage I	I/II	WHITE		Locoregiol Recurrence			537	[Not Available]	1	2161		0.396041	0.42	0.61	3.47281	0.974	0.5675	-0.0615	0.2205	-0.2944	0.2045	-349.938	837.54	-1118.08	BRAF_Hotspot_Mutants	All_Metastases	Regiol_Lymph_Node	UV sigture	immune	hypo-methylated	MIR.type.2	PROT.type.1	OSC.5	0	0.00580235	0	0.00509314	0.363698
TCGA-EE-A2M6		Pre	0	TCGA	3932	0			Male	50	Stage I	I/II	WHITE						[Not Available]	0	1883		0.0887546	0.05	0.29	19.8916	1.1086	0.4775	0.4988	-0.2258	-1.5689	0.001	-323.268	638.914	-1041.94	BRAF_Hotspot_Mutants	All_Metastases	Regiol_Lymph_Node	UV sigture	immune	hyper-methylated	MIR.type.3	PROT.type.3	OSC.7	0	0.00378147	0	0.00812701	0.0604848
TCGA-EE-A2M7		Pre	0	TCGA	877	1			Male	55	Stage II	I/II	WHITE		Distant Metastasis	Other, Specify	mediastil lymph nodes	799	[Not Available]	1	2485		0.364409	0.53	0.03	4.14744	-1.1509	-0.24	0.2263	1.6293	0.3944	0.0904	-427.35	-1204.51	-2236.25	BRAF_Hotspot_Mutants	All_Metastases	Regiol_Lymph_Node	not UV	immune	hyper-methylated	MIR.type.4	-	OSC.7	0	0.101805	0.150167	0.0495508	0.201113
TCGA-EE-A2M8		Pre	0	TCGA	601	1			Female	43	Stage III	III	WHITE		Distant Metastasis	Brain		498	[Not Available]	1	2100		0.620439	0.75	0.15	10.3872	-0.2744	-0.189	1.7626	2.7891	0.8482	0.0425	323.387	597.253	-1230.12	BRAF_Hotspot_Mutants	All_Metastases	Regiol_Lymph_Node	UV sigture	immune	normal-like	MIR.type.2	PROT.type.4	OSC.7	0	0.0144453	0	0.00401017	0.578687
TCGA-EE-A2MC		Pre	0	TCGA	1871	1			Male	62	Stage I	I/II	WHITE		Distant Metastasis	Other, Specify	right neck lymph nodes	896	[Not Available]	1	2594		0.547068	0.61	0.12	13.6401	0.3808	0.199	1.1033	1.7887	0.625	0.4415	976.277	614.107	-262.306	RAS_Hotspot_Mutants	All_Metastases	Regiol_Lymph_Node	UV sigture	immune	hypo-methylated	MIR.type.1	PROT.type.1	OSC.2	0	0.0370536	0	0.00639849	0.368548
TCGA-EE-A2MD		Pre	0	TCGA	1438	1			Male	41	Stage II	I/II	WHITE		Regiol lymph node			1344	[Not Available]	1	365		0.348259	0.37	0.02	3.0592	0.5739	0.1175	0.2316	0.9096	-0.6783	-0.2864	127.091	1129.73	-3264.31	RAS_Hotspot_Mutants	All_Metastases	Regiol_Lymph_Node	UV sigture	keratin	hyper-methylated	MIR.type.3	PROT.type.2	OSC.3	0	0.120734	0	0.115699	0.120681
TCGA-EE-A2ME	NR	Pre	0	TCGA	3141	1			Male	40	Stage I	I/II	WHITE		Distant Metastasis	Other, Specify	retroperitoneal nodule	2703	[Not Available]	1	1417		0.796452	0.75	0.14	10.3135	-0.1178	-0.217	1.7043	3.1893	0.7425	0.1209	368.914	896.151	-997.3	BRAF_Hotspot_Mutants	All_Metastases	Regiol_Lymph_Node	UV sigture	immune	normal-like	MIR.type.1	-	OSC.7	0	0.0459317	0.0507034	0.0292759	0.296688
TCGA-EE-A2MF		Pre	0	TCGA	8174	1			Female	28	Stage I	I/II	WHITE		New primary melanoma			8071	[Not Available]	1	2497		0.112533	0.11	0.05	8.10825	0.4105	0.078	0.0846	0.3792	1.684	-0.4153	-1185.94	584.395	-2627.51	RAS_Hotspot_Mutants	All_Metastases	-	UV sigture	immune	CpG island-methylated	MIR.type.3	-	OSC.3	0	0.0349338	0	0.00622047	0.245429
TCGA-EE-A2MG		Pre	0	TCGA	3139	1			Male	12	Stage I	I/II	WHITE		Distant Metastasis	Lung		2585	[Not Available]	1	1346		0.600483	0.69	0.11	16.8772	0.2037	0.0055	1.2802	2.7865	0.5012	0.3546	-252.975	308.353	-2955.84	BRAF_Hotspot_Mutants	All_Metastases	Regiol_Lymph_Node	UV sigture	immune	normal-like	MIR.type.4	-	OSC.5	0	0.309075	0	0.0452288	0.115967
TCGA-EE-A2MH		Pre	0	TCGA	516	1			Male	55	Stage III	III	WHITE		Distant Metastasis	Bone		440	[Not Available]	1	1996		0.498646	0.57	0.11	36.3928	0.329	0.1875	0.8215	2.2406	0.4276	-0.083	496.122	23.9059	-2641.62	BRAF_Hotspot_Mutants	All_Metastases	Regiol_Lymph_Node	UV sigture	immune	hyper-methylated	MIR.type.1	-	OSC.4	0	0.126224	0.0623256	0.0704109	0.201002
TCGA-EE-A2MI		Pre	0	TCGA	6225	1			Male	32	Stage IIB	I/II	WHITE		New primary melanoma			2673	[Not Available]	1	1398		0.327936	0.34	0.05	3.26323	-0.3025	-0.088	0.8474	0.2797	0.1612	0.4707	-171.38	147.492	-2090.09	NF1_Any_Mutants	All_Metastases	Regiol_Lymph_Node	UV sigture	immune	hyper-methylated	MIR.type.1	PROT.type.3	OSC.2	0	0	0.0954412	0	0.158084
TCGA-EE-A2MJ		Pre	0	TCGA	2927	1			Male	49	Stage III	III	WHITE		Regiol lymph node			396	[Not Available]	1	1896		0.526349	0.65	0.68	9.44032	0.6112	0.0525	1.1262	2.5636	0.8647	-0.3057	421.793	591.469	-1856.97	NF1_Any_Mutants	All_Metastases	Regiol_Lymph_Node	UV sigture	immune	normal-like	MIR.type.3	PROT.type.2	OSC.2	0	0.127759	0	0.0151615	0.234309
TCGA-EE-A2MK		Pre	0	TCGA	5487	0			Female	7	Stage III	III	WHITE						[Not Available]	0	2178		0.205125	0.23	0.09	4.83482	-1.1255	-0.2355	0.6992	1.1763	0.5342	0.0131	-325.192	-122.938	-2362.34	BRAF_Hotspot_Mutants	All_Metastases	Regiol_Lymph_Node	UV sigture	immune	hypo-methylated	MIR.type.4	PROT.type.3	OSC.4	0	0	0.0473544	0	0.325862
TCGA-EE-A2ML	NR	Pre	0	TCGA	6590	1			Male	24	Stage II	I/II	WHITE		Distant Metastasis	Bone		4983	[Not Available]	1	2101		0.338033	0.38	0.95		-0.4522	-0.254	0.4052	1.2364	0.1506	-0.1623	812.072	195.537	-1230.91	RAS_Hotspot_Mutants	All_Metastases	Regiol_Lymph_Node	UV sigture	immune	CpG island-methylated	MIR.type.3	PROT.type.2	OSC.3	0	0.0459654	0	0	0.393271
TCGA-EE-A2MM		Pre	0	TCGA	5107	1			Female	52	Stage I	I/II	WHITE		New primary melanoma			1357	[Not Available]	1	378		0.0722378	0.1	0.25	8.7187	0.5877	0.04	-0.1621	-0.1639	1.319	-0.2122	-356.54	174.321	-3297.66	RAS_Hotspot_Mutants	All_Metastases	Regiol_Lymph_Node	UV sigture	immune	CpG island-methylated	MIR.type.3	PROT.type.3	OSC.1	0	0.0048287	0.00514862	0	0.172098
TCGA-EE-A2MN		Pre	0	TCGA	1446	1			Male	47	Stage I	I/II	WHITE		Distant Metastasis	Brain		969	[Not Available]	1	2676		0.231118	0.21	0.08	19.564	-0.1751	-0.1235	0.769	1.3707	0.0789	-0.3069	6.28813	-290.203	-722.746	RAS_Hotspot_Mutants	All_Metastases	Regiol_Lymph_Node	UV sigture	immune	CpG island-methylated	MIR.type.3	PROT.type.3	OSC.1	0	0.0296014	0.0009	0	0.336936
TCGA-EE-A2MP	R	Pre	0	TCGA	7563	0			Female	23	Stage I	I/II	WHITE		Locoregiol Recurrence			365	[Not Available]	1	1799		0.255981	0.39	0.17	23.4756	0.0473	0.053	0.7027	0.342	0.3658	0.0416	102.876	80.0228	-892.747	BRAF_Hotspot_Mutants	All_Metastases	Regiol_Lymph_Node	UV sigture	immune	hypo-methylated	MIR.type.1	PROT.type.2	OSC.7	0	0	0	0.0094171	0.398405
TCGA-EE-A2MQ		Pre	0	TCGA	1315	1			Female	59	Stage IIIA	III	WHITE		Regiol lymph node			986	[Not Available]	1	2694		0.167823	0.19	0.09	2.90704	0.6672	0.178	0.1009	-0.3382	-0.2011	0.1987	185.868	1234.81	2288.78	BRAF_Hotspot_Mutants	All_Metastases	Regiol_Lymph_Node	UV sigture	immune	CpG island-methylated	MIR.type.1	-	OSC.5	0	0.0577912	0	0.00113326	0.0929108
TCGA-EE-A2MR		Pre	0	TCGA	4088	0			Male	50	Stage I	I/II	WHITE					3136	[Not Available]	1	1609		0.626262	0.78	0.52	2.76918	0.56	0.096	1.4267	2.7548	0.1388	0.5467	-760.617	1535.52	-555.891	Triple_WT	All_Metastases	Regiol_Lymph_Node	UV sigture	immune	normal-like	MIR.type.2	PROT.type.3	OSC.1	0	0.0692294	0.0887303	0.00937127	0.238294
TCGA-EE-A2MS		Pre	0	TCGA	4942	0			Male	61	Stage II	I/II	WHITE		New primary melanoma			1883	[Not Available]	1	862		0.149638	0.18	0.23		0.6352	-0.009	0.2771	0.8536	-0.2451	0.119	-894.039	532.073	-1627.14	NF1_Any_Mutants	All_Metastases	Regiol_Lymph_Node	UV sigture	MITF-low	CpG island-methylated	MIR.type.4	PROT.type.2	OSC.2	0	0.0252779	0	0.0760888	0.331135
TCGA-EE-A2MT		Pre	0	TCGA	2166	0			Male	34	Stage IB	I/II	WHITE						[Not Available]	0	1076		0.131239	0.12	0	4.92615	0.5675	0.1285	-0.6682	-0.3286	-0.4131	-0.0081	-408.897	1378.45	-1828.69	NF1_Any_Mutants	All_Metastases	Regiol_Lymph_Node	UV sigture	keratin	hyper-methylated	MIR.type.1	PROT.type.2	OSC.2	0	0.0379907	0	0.0347132	0.164706
TCGA-EE-A2MU		Pre	0	TCGA	1620	0			Male	60	Stage IA	I/II	WHITE						[Not Available]	0	638		0.517278	0.71	0.19	11.4388	0.463	0.1	1.1246	1.4579	1.07	0.1576	414.688	812.472	-2292.33	RAS_Hotspot_Mutants	All_Metastases	Regiol_Skin_or_Soft_Tissue	UV sigture	immune	hyper-methylated	MIR.type.1	PROT.type.1	OSC.1	0	0	0.00977003	0.00366455	0.351975
TCGA-EE-A3AA		Pre	0	TCGA	3781	0			Male	36	Stage III	III	WHITE						[Not Available]	0	1843		0.592487	0.7	0.5	32.8177	0.5204	0.109	0.5705	1.8028	0.8154	0.0163	-790.818	304.143	-2107.44	BRAF_Hotspot_Mutants	All_Metastases	Regiol_Lymph_Node	UV sigture	immune	normal-like	MIR.type.1	PROT.type.3	OSC.5	0	0.145726	0.0738026	0.0150547	0.125997
TCGA-EE-A3AB		Pre	0	TCGA	3733	0			Male	19	Stage III	III	WHITE						[Not Available]	0	1827		0.330763	0.49	0.21	0.538706	0.0849	0.0275	1.074	0.4206	-0.9709	0.7688	-25.4256	-504.927	149.955	BRAF_Hotspot_Mutants	All_Metastases	Regiol_Lymph_Node	UV sigture	MITF-low	hyper-methylated	MIR.type.2	PROT.type.3	OSC.4	0	0	0.0221562	0	0.035876
TCGA-EE-A3AC		Pre	0	TCGA	1948	0			Male	36	Stage III	III	WHITE						[Not Available]	0	915		0.206083	0.18	0	16.1648	0.5708	0.037	0.4956	0.8812	0.6436	-0.2301	-450.683	696.624	-1696.95	RAS_Hotspot_Mutants	All_Metastases	Regiol_Lymph_Node	UV sigture	immune	CpG island-methylated	MIR.type.3	PROT.type.3	OSC.2	0	0.0544329	0	0.0157536	0.26771
TCGA-EE-A3AD	NR	Pre	0	TCGA	875	1			Male	39	Stage III	III	WHITE		Distant Metastasis|Distant Metastasis|Distant Metastasis|Distant Metastasis|Distant Metastasis|Distant Metastasis	Other, Specify|Lung|Other, Specify|Other, Specify|Brain|Liver	spil cord|[Not Applicable]|right anterior abdomen - skin and soft tissue|right anterior chest - skin and soft tissue|[Not Applicable]|[Not Applicable]	554	[Not Available]	1	2187		0.0384324	0	0.32	3.63645	-0.2177	-0.1365	-1.1989	-2.2208	-0.2374	-0.129	-567.505	735.118	-1755.33	BRAF_Hotspot_Mutants	All_Metastases	Regiol_Lymph_Node	UV sigture	keratin	hyper-methylated	MIR.type.3	PROT.type.2	OSC.5	0	0	0.0735443	0.0120225	0
TCGA-EE-A3AF		Pre	0	TCGA	420	1			Female	37	Stage IIIC	III	WHITE		Locoregiol Recurrence			201	[Not Available]	1	964		0.236679	0.22	0.04	1.64843	0.3052	0.133	0.5303	0.0722	-0.7179	-0.0382	-1306.56	917.038	-1617.36	BRAF_Hotspot_Mutants	All_Metastases	Regiol_Lymph_Node	UV sigture	immune	hyper-methylated	MIR.type.2	PROT.type.3	OSC.6	0	0	0.0186531	0	0.237151
TCGA-EE-A3AG		Pre	0	TCGA	1265	1			Male	14	Stage III	III	WHITE		Regiol lymph node			229	[Not Available]	1	1165		0.087679	0.11	0.28	0.466062	0.9203	0.4065	-0.6857	-1.6279	-1.8957	0.2089	-1233.58	544.181	-1947.26	BRAF_Hotspot_Mutants	All_Metastases	Regiol_Skin_or_Soft_Tissue	UV sigture	MITF-low	hypo-methylated	MIR.type.4	PROT.type.3	OSC.6	0	0.0349984	0	0.001	0.0523019
TCGA-EE-A3AH		Pre	0	TCGA	4222	1			Male	19	Stage II	I/II	WHITE		Locoregiol Recurrence			1981	[Not Available]	1	940		0.0374084	0.02	0	17.4413	0.447	0.0365	-0.502	-0.9439	-1.2437	0.1551	-1060.93	389.183	-3346.69	BRAF_Hotspot_Mutants	All_Metastases	Regiol_Lymph_Node	UV sigture	MITF-low	hyper-methylated	MIR.type.4	-	OSC.6	0	0.0409556	0	0.0424285	0.016887
TCGA-EE-A3J3		Pre	0	TCGA	5237	1			Male	31	Stage IB	I/II	WHITE		Regiol lymph node			4523	[Not Available]	1	2018		0.201569	0.37	0.34	1.05459	0.6061	0.1385	0.3428	0.5236	1.2855	0.2761	-44.2861	740.967	-2729.79	BRAF_Hotspot_Mutants	All_Metastases	-	UV sigture	immune	hyper-methylated	MIR.type.1	PROT.type.2	OSC.7	0	0.0191552	0	0	0.0715961
TCGA-EE-A3J4		Pre	0	TCGA	3869	1			Male	61	Stage II	I/II	WHITE		Locoregiol Recurrence			1429	[Not Available]	1	451		0.0984263	0.09	0.06	4.08014	0.4289	0.0875	-0.2427	-0.6323	-0.1576	-0.1347	-422.659	520.704	-2534.44	BRAF_Hotspot_Mutants	All_Metastases	-	UV sigture	immune	CpG island-methylated	MIR.type.3	-	OSC.7	0	0.00789434	0.0002	0	0.161598
TCGA-EE-A3J5		Pre	0	TCGA	1124	1			Male	60	Stage III	III	WHITE		Locoregiol Recurrence			467	[Not Available]	1	2047		0.290064	0.27	0.68	4.69405	0.3327	0.102	0.6435	1.184	0.1234	0.0934	-42.0861	328.981	807.279	NF1_Any_Mutants	All_Metastases	Regiol_Skin_or_Soft_Tissue	UV sigture	immune	hypo-methylated	MIR.type.1	-	OSC.2	0	0.00513825	0.00196139	0.0291168	0.345512
TCGA-EE-A3J7		Pre	0	TCGA	1949	0			Male	32	Stage I	I/II	WHITE		Regiol lymph node			1270	[Not Available]	1	295		0.0925267	0.11	0.32	0.564567	0.4902	0.105	-0.61	-0.9128	-0.1096	-0.1451	-405.441	561.025	-1500.96	RAS_Hotspot_Mutants	All_Metastases	-	UV sigture	MITF-low	CpG island-methylated	MIR.type.3	PROT.type.3	OSC.3	0	0.0102979	0	0	0.292036
TCGA-EE-A3J8		Pre	0	TCGA	1044	1			Male	48	Stage IIIA	III	WHITE					1035	[Not Available]	1	45		0.0279078	0.03	0.08	0.419977	0.0804	0.1625	-1.0638	-2.8011	-1.271	-0.4159	-300.189	384.552	-2794.53	RAS_Hotspot_Mutants	All_Metastases	Regiol_Skin_or_Soft_Tissue	UV sigture	MITF-low	CpG island-methylated	MIR.type.4	-	OSC.1	0	0.0112671	0	0	0
TCGA-EE-A3JA		Pre	0	TCGA	1618	1			Male	33	Stage IB	I/II	WHITE		Regiol lymph node			539	[Not Available]	1	2164		0.209226	0.25	0.03	3.8815	0.1375	-0.0365	0.6057	0.8268	-0.3036	-0.4964	21.0858	1040.66	-2216.11	RAS_Hotspot_Mutants	All_Metastases	-	UV sigture	immune	hypo-methylated	MIR.type.3	PROT.type.3	OSC.3	0	0.0124809	0.0151913	0.050387	0.234889
TCGA-EE-A3JB		Pre	0	TCGA	6138	0			Female	49	Stage III	III	WHITE		Locoregiol Recurrence			1434	[Not Available]	1	457		0.31131	0.48	0.04	0.255229	1.0419	0.3605	0.542	-0.3739	0.5848	0.5276	337.799	1037.26	-1489.64	BRAF_Hotspot_Mutants	All_Metastases	-	UV sigture	MITF-low	hypo-methylated	MIR.type.1	-	OSC.5	0	0.0132536	0	0.00203466	0.0222966
TCGA-EE-A3JD		Pre	0	TCGA	832	1			Male	59	Stage III	III	WHITE		Distant Metastasis	Lung		364	[Not Available]	1	1795		0.719766	0.82	0.27	1.3791	0.6787	0.2105	1.4628	2.8884	0.6884	-0.0248	798.367	763.805	-2821.1	NF1_Any_Mutants	All_Metastases	-	UV sigture	immune	normal-like	MIR.type.1	PROT.type.3	OSC.5	0	0.150739	0.125284	0.0354804	0.218566
TCGA-EE-A3JE		Pre	0	TCGA	1562	0			Male	64	Stage IIIB	III	WHITE		Regiol lymph node			194	[Not Available]	1	908		0.603898	0.74	0.25	1.12707	0.0681	0	1.4665	2.5851	0.9717	0.3818	1400.49	1010.9	-2605.54	BRAF_Hotspot_Mutants	All_Metastases	-	UV sigture	immune	normal-like	MIR.type.1	PROT.type.2	OSC.6	0	0	0.0271054	0.0389606	0.434104
TCGA-EE-A3JH		Pre	0	TCGA	4086	0			Male	43	Stage IB	I/II	WHITE		Regiol lymph node			537	[Not Available]	1	2161		0.593764	0.79	0.36	3.34562	-0.1203	-0.049	1.6738	2.9432	0.8954	0.1204	1108.3	478.185	-2010.45	BRAF_Hotspot_Mutants	All_Metastases	Regiol_Lymph_Node	UV sigture	immune	normal-like	MIR.type.1	PROT.type.1	OSC.7	0	0.0244885	0.0168023	0.0496594	0.209873
TCGA-EE-A3JI		Pre	0	TCGA	4648	1			Male	37	Stage I	I/II	WHITE		New primary melanoma			725	[Not Available]	1	2401		0.0854908	0.11	0.24	1.77683	0.3225	-0.1085	-0.2167	-0.6666	1.0716	-0.7751	-512.837	88.0329	-2290.09	RAS_Hotspot_Mutants	All_Metastases	-	UV sigture	immune	CpG island-methylated	MIR.type.3	-	OSC.1	1	0.00392268	0.0123991	0.02763	0.00436115
TCGA-ER-A193		Pre	0	TCGA	955	1			Male	51	Stage IIB	I/II	WHITE		Distant Metastasis	Brain		806	[Not Available]	1	2495		0.341873	0.33	0.14	4.5801	0.2311	-0.0495	0.7092	1.0474	0.3203	0.4538	41.0817	843.205	-2374.13	BRAF_Hotspot_Mutants	All_Metastases	Regiol_Lymph_Node	UV sigture	immune	CpG island-methylated	MIR.type.2	PROT.type.4	OSC.6	0	0.0255614	0	0.00647982	0.174481
TCGA-ER-A194		Pre	0	TCGA	1354	1			Male	66	[Not Available]	Not Available	WHITE						[Not Available]	1	375	C3	0.316114	0.4	0	1.40511	-1.0834	-0.4135	0.0116	0.393	-0.4515	-0.1827	-647.515	-848.077	-1059.23	RAS_Hotspot_Mutants	All_Primaries	Primary_Disease	UV sigture	immune	hyper-methylated	MIR.type.2	PROT.type.3	OSC.2	0	0.0007	0	0	0.390987
TCGA-ER-A195		Pre	0	TCGA	1078	1			Male	35	[Not Available]	Not Available	WHITE						[Not Available]	1	91		0.341844	0.42	0	1.47894	0.4415	0.009	1.0133	1.2304	0.4694	0.4009	876.685	1172.94	-1066.04	RAS_Hotspot_Mutants	All_Metastases	Regiol_Lymph_Node	UV sigture	immune	normal-like	MIR.type.1	PROT.type.1	OSC.3	0	0.0153945	0	0	0.219297
TCGA-ER-A196		Pre	0	TCGA	1785	0			Female	53	Stage IIC	I/II	WHITE						[Not Available]	0	776	C1	0.555601	0.74	0.06	1.68708	-0.379	-0.0375	-0.5168	-0.8249	-1.0622	0.5673	68.1678	386.53	-350.906	Triple_WT	All_Primaries	Primary_Disease	not UV	keratin	normal-like	MIR.type.1	PROT.type.1	OSC.3	0	0.00152312	0.00673505	0.00796286	0.00316149
TCGA-ER-A197		Pre	0	TCGA	424	1			Female	72	Stage IIIB	III	WHITE		Distant Metastasis	Lung		110	[Not Available]	1	115		0.519843	0.69	0.56	28.6923	0.2902	0.15	1.0646	0.9003	-0.046	0.1838	373.544	-173.709	22.1818	Triple_WT	All_Metastases	-	not UV	keratin	hyper-methylated	MIR.type.2	PROT.type.4	OSC.3	0	0	0	0.0078592	0.420192
TCGA-ER-A198		Pre	0	TCGA	1544	1			Male	34	[Not Available]	Not Available	WHITE					0	[Not Available]	1	2		0.213871	0.21	0	4.7645	0.8121	0.1675	0.4124	0.0037	0.8599	-0.38	121.871	1842.17	-2621.7	BRAF_Hotspot_Mutants	All_Metastases	Regiol_Skin_or_Soft_Tissue	UV sigture	immune	CpG island-methylated	MIR.type.3	PROT.type.2	OSC.7	0	0	0.0404667	0	0.0593681
TCGA-ER-A199		Pre	0	TCGA	279	1			Female	75	Stage IIIC	III	WHITE					119	[Not Available]	1	212		0.564375	0.58	0.39		0.243	0.087	1.106	2.6811	0.499	-0.046	-761.822	319.771	-2685.69	RAS_Hotspot_Mutants	All_Metastases	Regiol_Lymph_Node	UV sigture	immune	hyper-methylated	MIR.type.4	PROT.type.3	OSC.1	0	0.213724	0	0.0800909	0.199709
TCGA-ER-A19A		Pre	0	TCGA	2365	0			Male	68	Stage IV	IV	WHITE					1617	[Not Available]	1	635		0.620106			7.31649	0.2436	-0.043	1.8104	1.8813	1.324	0.8575	916.485	500.116	-375.27	NF1_Any_Mutants	All_Metastases	Regiol_Skin_or_Soft_Tissue	UV sigture	immune	normal-like	MIR.type.1	PROT.type.1	OSC.2	0	0.0104566	0	0	0.216777
TCGA-ER-A19B		Pre	0	TCGA	2993	1			Male	31	[Not Available]	Not Available	WHITE		Regiol lymph node			829	[Not Available]	1	2520		0.129608	0.22	0	0.0525754	0.4065	-0.025	-0.2361	-1.1523	-0.9814	0.0638	88.3403	339.498	299.618	BRAF_Hotspot_Mutants	All_Metastases	Regiol_Skin_or_Soft_Tissue	not UV	MITF-low	hypo-methylated	MIR.type.1	PROT.type.3	OSC.4	0	0.0499613	0	0.00963205	0.096582
TCGA-ER-A19C		Pre	0	TCGA	1487	1			Male	66	Stage I	I/II	WHITE						[Not Available]	1	511		0.163843	0.2	0.44	17.1857	0.2154	0.051	-0.2436	-1.3542	-0.8618	0.1523	-347.502	783.887	25.4921	BRAF_Hotspot_Mutants	All_Metastases	Regiol_Lymph_Node	UV sigture	keratin	hyper-methylated	MIR.type.2	PROT.type.2	OSC.7	0	0.0327791	0	0.00218042	0.0212423
TCGA-ER-A19D		Pre	0	TCGA	383	1			Female	35	Stage IB	I/II	WHITE		Distant Metastasis	Lung		357	[Not Available]	1	1770		0.19678	0.23	0.15	7.81693	0.5154	-0.01	0.7487	1.0771	-0.4712	0.7325	-1214.14	887.038	-3737.17	RAS_Hotspot_Mutants	All_Metastases	Regiol_Skin_or_Soft_Tissue	UV sigture	MITF-low	normal-like	MIR.type.4	PROT.type.3	OSC.3	0	0.0577152	0	0	0.134979
TCGA-ER-A19E	NR	Pre	0	TCGA	396	1			Female	25	Stage IB	I/II	WHITE		Regiol lymph node	Other, Specify	Cervical lymphnode	64	[Not Available]	1	2290		0.18701	0.28	0.16	6.181	1.054	0.3545	-0.0556	-0.1774	-1.6176	0.5625	-1802.5	906.023	-2924.51	BRAF_Hotspot_Mutants	All_Metastases	Regiol_Lymph_Node	UV sigture	MITF-low	hyper-methylated	MIR.type.4	PROT.type.3	OSC.6	0	0.010845	0.00977015	0.0005	0.0783455
TCGA-ER-A19F		Pre	0	TCGA	802	1			Male	71	[Not Available]	Not Available	WHITE						[Not Available]	0	2491		0.134172	0.12	0	1.18576	0.4388	0.0515	-0.2781	-0.6271	-0.5143	-0.1005	-797.745	1025.93	-1807.65	NF1_Any_Mutants	All_Metastases	Regiol_Lymph_Node	UV sigture	immune	hypo-methylated	MIR.type.2	PROT.type.3	OSC.4	0	0.00876099	0	0	0.148085
TCGA-ER-A19G		Pre	0	TCGA	9188	0			Female	37	[Not Available]	Not Available	WHITE						[Not Available]	0	2621		0.242012	0.36	0.08	17.0035	0.8692	0.228	0.8612	1.1009	1.3628	-0.0219	535.666	1300.93	-1445.03	BRAF_Hotspot_Mutants	All_Metastases	Regiol_Lymph_Node	UV sigture	immune	CpG island-methylated	MIR.type.2	PROT.type.3	OSC.4	0	0.0198879	0	0.00591159	0.0343509
TCGA-ER-A19H	NR	Pre	0	TCGA	4634	1			Male	29	[Not Available]	Not Available	WHITE						[Not Available]	0	2041		0.249428	0.33	0	5.00144	0.5527	0.064	0.4728	0.9878	0.1718	0.2137	-303.134	462.692	-3748.1	BRAF_Hotspot_Mutants	All_Metastases	Regiol_Skin_or_Soft_Tissue	UV sigture	immune	hypo-methylated	MIR.type.4	PROT.type.1	OSC.7	0	0.0302295	0	0	0.262802
TCGA-ER-A19J		Pre	0	TCGA	196	1			Male	43	Stage IV	IV	WHITE		Distant Metastasis	Lung		98	[Not Available]	1	2687		0.0943338	0.09	0.1	0.368097	0.053	-0.1	0.0232	-0.9139	-0.7801	0.3666	-533.184	151.534	-2243.92	BRAF_Hotspot_Mutants	All_Metastases	Regiol_Lymph_Node	UV sigture	keratin	CpG island-methylated	MIR.type.3	PROT.type.3	OSC.6	0	0.0167458	0	0.00344235	0.0988587
TCGA-ER-A19K		Pre	0	TCGA	469	1			Female	68	Stage IIC	I/II	WHITE		Regiol lymph node	Other, Specify	Neck- cervical lymphnode	211	[Not Available]	1	1039	C4	0.363714	0.42	0	3.0631	0.5006	0.1755	-0.1218	-0.6875	-0.0355	-0.1069	-650.849	886.78	-2524.34	BRAF_Hotspot_Mutants	All_Primaries	Primary_Disease	UV sigture	keratin	hyper-methylated	MIR.type.1	PROT.type.1	OSC.7	0	0.00540649	0	0	0.164936
TCGA-ER-A19L		Pre	0	TCGA	4000	1			Male	24	[Not Available]	Not Available	WHITE		Distant Metastasis	Lung		3689	[Not Available]	1	1812		0.0815645	0.13	0.06	2.62256	-1.0254	-0.2835	-0.1689	-1.01	-0.0702	0.1751	-582.885	-52.4399	-2059.43	Triple_WT	All_Metastases	Regiol_Lymph_Node	UV sigture	MITF-low	CpG island-methylated	MIR.type.1	PROT.type.1	OSC.3	0	0.027478	0.00902335	0	0.024909
TCGA-ER-A19M	NR	Pre	0	TCGA	1857	1			Male	25	Stage IB	I/II	WHITE		Locoregiol Recurrence	Other, Specify	lt.Brachial plexus	1152	[Not Available]	1	172		0.365909	0.49	0.04		0.9482	0.2705	0.9168	0.7298	0.1229	0.2911	197.3	1596.69	-3052.62	BRAF_Hotspot_Mutants	All_Metastases	Regiol_Lymph_Node	UV sigture	immune	hypo-methylated	MIR.type.2	PROT.type.1	OSC.4	0	0	0.0381308	0.0004	0.362406
TCGA-ER-A19N		Pre	0	TCGA	1341	1			Male	36	[Not Available]	Not Available	WHITE					0	[Not Available]	1	2		0.539467	0.65	0.13		0.2887	0.07	1.5012	1.9669	-0.1984	0.334	87.701	782.784	-501.665	RAS_Hotspot_Mutants	All_Metastases	Regiol_Lymph_Node	UV sigture	immune	normal-like	MIR.type.3	PROT.type.3	OSC.3	0	0.0494096	0	0.0286523	0.161026
TCGA-ER-A19O		Pre	0	TCGA		1			Male	45	Stage IIIB	III	WHITE		Distant Metastasis	Other, Specify	Rt. chest wall	308	[Not Available]	1	1584		0.414712	0.51	0	13.169	-1.481	-0.539	1.3799	1.8543	-0.8405	0.4654	289.707	-526.12	569.858	BRAF_Hotspot_Mutants	All_Metastases	Regiol_Lymph_Node	UV sigture	immune	normal-like	MIR.type.1	PROT.type.1	OSC.7	0	0.0361395	0.0313958	0.0121526	0.195197
TCGA-ER-A19P		Pre	0	TCGA	4930	1			Female	36	[Not Available]	Not Available	WHITE		Distant Metastasis	Brain		4352	[Not Available]	1	1986		0.638995	0.73	0.57	15.2847	-0.0015	-0.0845	1.7942	3.2619	0.8646	0.0437	217.275	103.194	-1787.99	BRAF_Hotspot_Mutants	All_Metastases	Regiol_Lymph_Node	not UV	immune	normal-like	MIR.type.2	PROT.type.2	OSC.5	0	0.018198	0.0391364	0.0677099	0.444907
TCGA-ER-A19Q		Pre	0	TCGA	1548	1			Female	26	[Not Available]	Not Available	WHITE		Distant Metastasis	Bone		1259	[Not Available]	1	282		0.348563	0.37	0.04	3.06061	0.4726	0.0165	1.1221	0.5531	0.2432	0.244	741.646	851.939	-662.19	BRAF_Hotspot_Mutants	All_Metastases	Regiol_Lymph_Node	UV sigture	immune	hypo-methylated	MIR.type.1	PROT.type.2	OSC.4	0	0.00764087	0	0.00427435	0.078663
TCGA-ER-A19S		Pre	0	TCGA	1505	0			Female	70	[Not Available]	Not Available	WHITE						[Not Available]	0	530		0.58435	0.68	0.49		-0.2677	-0.1475	1.4992	2.6652	0.7325	-0.1508	634.708	315.751	-2307.37	BRAF_Hotspot_Mutants	All_Metastases	Regiol_Lymph_Node	UV sigture	immune	hyper-methylated	MIR.type.2	PROT.type.2	OSC.7	0	0	0.00707933	0.027395	0.460998
TCGA-ER-A19T		Pre	0	TCGA	270	1			Male	40	Stage IV	IV	WHITE		Distant Metastasis	Brain		118	[Not Available]	1	201	C1	0.154073	0.03	0.2	1.5658	0.3533	0.11	-1.4043	-2.4681	-0.7099	0.2098	-638.297	286.598	-1415.4	-	All_Primaries	-	not UV	-	CpG island-methylated	-	-	-	0	0	0.0412449	0	0.10391
TCGA-ER-A19W		Pre	0	TCGA	4507	1			Female	37	[Not Available]	Not Available	WHITE		Distant Metastasis	Brain		4126	[Not Available]	1	1936		0.567282	0.63	0.2	10.3963	0.8612	0.185	1.5422	2.2551	1.3028	-0.1346	1072.09	1156.67	-2794.04	RAS_Hotspot_Mutants	All_Metastases	-	UV sigture	immune	hyper-methylated	MIR.type.2	PROT.type.1	OSC.3	0	0.0249204	0	0.00314753	0.361208
TCGA-ER-A1A1		Pre	0	TCGA	3196	0			Male	47	Stage IIIC	III	WHITE					1971	[Not Available]	1	931		0.872862	0.8	0.02	38.7522	0.686	0.0865	1.5872	3.4041	0.0312	-0.3001	-215.297	277.554	-538.038	Triple_WT	All_Metastases	Regiol_Lymph_Node	UV sigture	immune	normal-like	MIR.type.1	PROT.type.2	OSC.3	0	0.366807	0.0417252	0.117998	0.114048
TCGA-ER-A2NB		Pre	0	TCGA	857	1			Male	46	Stage IIIB	III	WHITE					461	[Not Available]	1	2036	C3	0.368749	0.71	0.37	1.0879	-0.8773	-0.112	0.0695	0.672	-0.7118	0.3462	256.001	-386.299	-746.306	RAS_Hotspot_Mutants	All_Primaries	Primary_Disease	not UV	-	CpG island-methylated	MIR.type.1	PROT.type.1	OSC.1	0	0.125086	0	0.0182195	0.414728
TCGA-ER-A2NC		Pre	0	TCGA	1333	1			Male	39	Stage IB	I/II	WHITE		Distant Metastasis	Bone		1157	[Not Available]	1	177		0.285115	0.27	0.19	7.94075	0.5193	0.0645	0.8669	-0.1199	-0.0979	0.8428	-505.641	1075.3	-2237.34	-	All_Metastases	Distant_Metastases	UV sigture	MITF-low	hyper-methylated	MIR.type.2	PROT.type.3	OSC.4	0	0.00565087	0.00828559	0	0.0995583
TCGA-ER-A2ND		Pre	0	TCGA	710	1			Female	46	Stage IIIC	III	WHITE						[Not Available]	1	2383		0.192014	0.28	0.15	1.59569	-0.0374	0.081	-0.204	-0.3298	-0.4727	-0.4472	-1086.54	-49.5584	-2386.93	BRAF_Hotspot_Mutants	All_Metastases	Distant_Metastases	not UV	keratin	CpG island-methylated	MIR.type.1	PROT.type.2	OSC.4	0	0.0653892	0	0	0.18301
TCGA-ER-A2NE	NR	Pre	0	TCGA					Male	28	Stage 0	I/II	WHITE						[Not Available]		1		0.0918142	0.02	0.02	0.371072	0.627	0.1555	-1.1246	-2.4034	-1.2823	-0.1978	-195.08	898.072	-1597.68	RAS_Hotspot_Mutants	All_Metastases	-	UV sigture	keratin	hyper-methylated	MIR.type.4	PROT.type.3	OSC.3	0	0	0.00771705	0.00838297	0.0742747
TCGA-ER-A2NF		Pre	0	TCGA	877	1			Male	42	Stage IIIB	III	WHITE					230	[Not Available]	1	1173	C2	0.181023	0.42	0	11.7004	-0.3817	-0.06	0.3696	1.7516	0.6595	-0.0034	-324.83	-113.14	-1885.39	-	All_Primaries	-	UV sigture	-	normal-like	-	-	-	0	0	0.0253065	0.42415	0.199416
TCGA-ER-A2NG	NR	Pre	0	TCGA	1490	1			Female	32	Stage IIIC	III	WHITE		Distant Metastasis	Other, Specify	Right Deltoid	766	[Not Available]	1	2448		0.479342	0.52	0.16		0.5684	0.0785	1.1552	1.3518	0.7964	0.1554	522.925	815.539	2010.65	BRAF_Hotspot_Mutants	All_Metastases	Regiol_Lymph_Node	UV sigture	immune	hyper-methylated	MIR.type.2	PROT.type.1	OSC.7	1	0	0.0237759	0.00200986	0.435927
TCGA-ER-A2NH		Pre	0	TCGA	1264	0			Male	38	Stage IIIC	III	WHITE						[Not Available]	0	288		0.477975	0.53	0.01	20.2366	0.3824	0.0775	1.4584	2.0684	0.8928	0.4963	640.758	1010.49	-1246	RAS_Hotspot_Mutants	All_Metastases	Regiol_Lymph_Node	UV sigture	immune	normal-like	MIR.type.2	PROT.type.2	OSC.3	0	0.0211762	0	0.0333137	0.502229
TCGA-ER-A3ES		Pre	0	TCGA	7514	1			Male	14	[Not Available]	Not Available	WHITE						[Not Available]	1	2432		0.0145865	0.01	0	0.14955	-0.2619	-0.094	-1.9405	-2.4209	-1.7122	-1.2329	-1731.94	-104.302	-3905.81	Triple_WT	All_Metastases	Distant_Metastases	not UV	keratin	hyper-methylated	MIR.type.3	PROT.type.3	OSC.3	0	0	0.0562433	0.109526	0.208088
TCGA-ER-A3ET		Pre	0	TCGA	2829	1			Female	53	Stage IIIA	III	WHITE		Distant Metastasis	Lung		2435	[Not Available]	1	1254		0.296949	0.4	0.19	14.0347	0.2065	0.0425	0.5881	0.6063	0.564	0.3442	267.497	163.604	-1060.52	Triple_WT	All_Metastases	Regiol_Skin_or_Soft_Tissue	not UV	immune	CpG island-methylated	MIR.type.1	PROT.type.4	OSC.1	0	0.0536668	0.0333422	0	0.0651554
TCGA-ER-A3EV	NR	Pre	0	TCGA	1429	1			Male	44	Stage III	III	WHITE					728	[Not Available]	1	2404		0.205957	0.37	0.15	2.62218	0.6725	0.2	-0.0217	0.584	-1.1421	-0.2127	280.009	325.54	-2249.73	Triple_WT	All_Metastases	-	not UV	keratin	hyper-methylated	MIR.type.1	-	OSC.4	0	0.0279165	0	0.0719938	0.367459
TCGA-ER-A3PL		Pre	0	TCGA	1010	0			Male	19	Stage IV	IV	WHITE					945	[Not Available]	1	2650		0.0726333	0.23	0.29	4.30263	0.015	-0.0325	-0.0164	-0.9959	0.5211	0.2757	-198.5	838.333	-3447.35	BRAF_Hotspot_Mutants	All_Metastases	Regiol_Skin_or_Soft_Tissue	UV sigture	MITF-low	CpG island-methylated	MIR.type.2	PROT.type.2	OSC.4	0	0.00830563	0	0.00119175	0.0641096
TCGA-ER-A42H		Pre	0	TCGA	426	1			Male	65	[Not Available]	Not Available	WHITE					259	[Not Available]	1	1349	C4	0.0245368	0.06	0.33	7.05202	0.3723	0.18	-0.5829	-1.9112	-1.3342	0.0137	-1973.34	271.99	-3550.25	Triple_WT	All_Primaries	-	not UV	keratin	CpG island-methylated	MIR.type.3	-	OSC.1	0	0	0.0273192	0.00324941	0.0528029
TCGA-ER-A42K		Pre	0	TCGA	394	1			Female	29	Stage IIIC	III	WHITE					206	[Not Available]	1	1004		0.12364	0.15	0.17	0.0644093	0.3301	0.0615	-0.2866	-0.5848	0.0844	0.3581	316.47	466.456	-3648.29	BRAF_Hotspot_Mutants	All_Metastases	-	UV sigture	MITF-low	hypo-methylated	MIR.type.2	-	OSC.6	0	0.056865	0.00861052	0.0291852	0.034134
TCGA-ER-A42L		Pre	0	TCGA	4533	0			Male	38	Stage II	I/II	WHITE					3812	[Not Available]	1	1850		0.415828	0.89	0.21	12.797	-0.0623	-0.0215	1.3601	2.0182	0.0828	0.1005	-38.0929	722.593	-2554.08	BRAF_Hotspot_Mutants	All_Metastases	-	UV sigture	immune	normal-like	MIR.type.4	-	OSC.7	0	0	0.0173844	0.0270303	0.369475
TCGA-FR-A2OS		Pre	0	TCGA	368	1			Female	38	Stage IIC	I/II	WHITE		Locoregiol Recurrence			283	[Not Available]	1	1472	C4	0.155661	0.35	0.02	0.148449	0.7272	0.2545	-0.4008	-2.1184	-1.9395	0.2369	-767.731	785.798	-2825.67	Triple_WT	All_Primaries	Primary_Disease	not UV	keratin	hyper-methylated	MIR.type.3	-	OSC.1	0	0.00163673	0	0.00138305	0
TCGA-FR-A3R1		Pre	0	TCGA	685	0			Male	58	Stage IIC	I/II	WHITE		Locoregiol Recurrence			678	[Not Available]	1	2338	C2	0.246184	0.25	0	2.96234	0.4425	0.056	-0.209	0.138	1.3051	-0.3231	168.018	1293.28	-2772.86	NF1_Any_Mutants	All_Primaries	Primary_Disease	UV sigture	immune	CpG island-methylated	MIR.type.2	PROT.type.1	OSC.2	0	0.0259778	0	0.0455106	0.442204
TCGA-FR-A3YN	R	Pre	0	TCGA	2828	0			Male	33	Stage IB	I/II	WHITE						[Not Available]	0	1471		0.17183	0.27	0.25	2.01302	-0.5991	-0.1725	0.1879	0.7257	0.5892	-0.3793	92.1365	199.037	2208.31	RAS_Hotspot_Mutants	All_Metastases	Regiol_Lymph_Node	UV sigture	immune	hypo-methylated	MIR.type.2	PROT.type.1	OSC.3	1	0.00957014	0	0.0102818	0.326915
TCGA-FR-A3YO	NR	Pre	0	TCGA		0			Female	1	I/II NOS	I/II	WHITE						[Not Available]	0	1		0.404988	0.59	0.06	0.578342	-0.1032	-0.0215	-0.2218	-1.4566	-1.4335	0.2083	-195.778	-870.334	-1128.47	BRAF_Hotspot_Mutants	All_Metastases	Distant_Metastases	UV sigture	keratin	CpG island-methylated	MIR.type.1	PROT.type.1	OSC.6	1	0	0.00915198	0.0077612	0
TCGA-FR-A44A	R	Pre	0	TCGA	5299	0			Female	18	Stage II	I/II	WHITE						[Not Available]	0	2151		0.541661	0.73	0.35	16.1843	0.1411	-0.004	1.5011	1.6799	0.618	0.0209	1314.36	736.159	2288.39	BRAF_Hotspot_Mutants	All_Metastases	Regiol_Lymph_Node	UV sigture	immune	normal-like	-	-	OSC.4	0	0	0.00717118	0.00515307	0.341876
TCGA-FR-A69P	R	Pre	0	TCGA	478	0			Female	23	Stage IIIC	III	WHITE		Regiol lymph node			274	[Not Available]	1	1433		0.120101	0.23	0.05	2.67098	0.6449	0.037	-0.3697	-0.9709	-1.4282	0.302	-960.452	985.376	-2633.23										1	0.0283432	0	0.0005	0.0937674
TCGA-FR-A726		Pre	0	TCGA	305	1			Male	79	Stage IIC	I/II	WHITE		Locoregiol Recurrence			273	[Not Available]	1	1430	C4	0.342127	0.3	0.17	0.067398	0.5764	0.14	-0.5372	-1.8775	-1.3584	0.265	-919.963	863.076	107.605										0	0.00428386	0	0.0006	0.0145877
TCGA-FR-A728	R	Pre	0	TCGA	583	0			Female	43	Stage IIIB	III	WHITE		Locoregiol Recurrence			64	[Not Available]	1	2290	C2	0.51796	0.71	0.02	2.16227	0.0928	0.062	0.7241	0.7076	0.6441	0.2696	632.758	131.179	-1447.94										0	0	0	0	0.415119
TCGA-FR-A729		Pre	0	TCGA	6716	0			Female	27	Stage I	I/II	WHITE		Distant Metastasis	Other, Specify	spleen	6299	[Not Available]	1	2275		0.376776	0.56	0.14	24.0724	0.2957	0.0525	1.1257	2.3141	0.5679	0.1937	-354.208	-207.299	-2589.66										0	0.073009	0	0.0264103	0.243408
TCGA-FR-A7U8	R	Pre	0	TCGA	847	0			Male	39	Stage IIIC	III	WHITE		Distant Metastasis	Brain		567	[Not Available]	1	2202		0.0973611	0.11	0.07	5.39873	0.5196	0.2335	-0.6493	-1.984	0.1938	-0.1437	-799.047	812.856	-2298.44										0	0.00472613	0	0.0019731	0
TCGA-FR-A7U9		Pre	0	TCGA	571	0			Female	52	Stage IIIC	III	WHITE		Locoregiol Recurrence			95	[Not Available]	1	2655		0.430098	0.72	0.28	4.12495	1.1105	0.5695	0.7999	1.0699	0.8886	0.5102	-547.392	1193.81	-3379.16										1	0.0179895	0	0.00373566	0.0664778
TCGA-FR-A7UA		Pre	0	TCGA	1164	0			Female	54	Stage IB	I/II	WHITE						[Not Available]	0	185		0.778905	0.83	0.5		-0.3092	-0.0975	1.9495	3.3952	0.8607	-0.191	1236.6	279.264	125.361										0	0.0120966	0	0.0149025	0.480344
TCGA-FR-A8YC	NR	Pre	0	TCGA	1059	1			Male	67	Stage IIB	I/II	WHITE						[Not Available]	1	70		0.13204	0.2	0.36	2.05224	-0.3249	-0.038	-0.1021	0.3989	-0.7947	-0.2999	-390.969	-748.242	-1064.1										0	0	0.00794697	0.0122349	0.539455
TCGA-FR-A8YD	NR	Pre	0	TCGA	1103	1			Female	45	Stage IIC	I/II	WHITE						[Not Available]	1	119		0.124587	0.21	0.17	1.09337	0.0804	0.122	-0.4794	-0.1414	-1.5142	0.0066	-1122.7	-65.8867	-1260.93										1	0.0526695	0	0.00851	0.0875658
TCGA-FR-A8YE		Pre	0	TCGA	3176	0			Male	30	Stage IA	I/II	WHITE						[Not Available]	0	1622		0.683602	0.79	0.03	11.2919	-0.4101	-0.1695	1.4564	2.599	-0.1294	0.2422	29.653	-933.018	-912.756										0	0.130728	0.0966272	0	0.120989
TCGA-FS-A1YW		Pre	0	TCGA	6598	1			Male	41	Stage IB	I/II	WHITE						[Not Available]	1	2315		0.154225	0.13	0.02		-0.7385	-0.222	-0.2886	0.1687	-0.631	-0.3553	-847.602	-707.313	3242.92	RAS_Hotspot_Mutants	All_Metastases	Regiol_Lymph_Node	UV sigture	immune	CpG island-methylated	MIR.type.3	PROT.type.2	OSC.3	0	0.144754	0	0.0128362	0.0823668
TCGA-FS-A1YX		Pre	0	TCGA	1478	1			Female	28	Stage I	I/II	WHITE						[Not Available]	1	501		0.245053	0.24	0.13		0.2609	0.062	-0.0051	-0.7515	0.1119	0.2994	-822.841	368.253	-2139.36	BRAF_Hotspot_Mutants	All_Metastases	Regiol_Skin_or_Soft_Tissue	UV sigture	MITF-low	hyper-methylated	MIR.type.4	-	OSC.4	0	0.00224019	0.00825716	0	0.0439061
TCGA-FS-A1YY		Pre	0	TCGA	6953	1			Female	44	Stage IIA	Not Available	WHITE					6777	[Not Available]	1	2337		0.180876	0.25	0		-0.0833	0.0565	-0.5503	-1.8207	-1.674	0.1295	-925.588	337.677	-91.4684	BRAF_Hotspot_Mutants	All_Metastases	Distant_Metastases	UV sigture	keratin	CpG island-methylated	MIR.type.2	-	OSC.7	0	0.0114469	0.00260066	0	0
TCGA-FS-A1Z0		Pre	0	TCGA	6164	1			Female	21	Stage IA	I/II	WHITE		Distant Metastasis	Lung		5503	[Not Available]	1	2182		0.273104	0.27	0.5		0.7911	0.145	0.8193	1.1084	0.2169	-0.0798	-172.953	1189.97	-3311.79	RAS_Hotspot_Mutants	All_Metastases	Distant_Metastases	UV sigture	immune	normal-like	MIR.type.4	PROT.type.3	OSC.3	0	0.0133745	0	0.0277897	0.295336
TCGA-FS-A1Z3		Pre	0	TCGA	636	1			Female	61	Stage IV	IV	WHITE					276	[Not Available]	1	1440		0.11252	0.13	0		0.1648	0.022	-0.3511	-1.1934	-0.9221	0.0035	-1277.24	868.203	-2334.81	RAS_Hotspot_Mutants	All_Metastases	Distant_Metastases	UV sigture	MITF-low	hyper-methylated	MIR.type.3	PROT.type.2	OSC.2	0	0	0.00604773	0.00176081	0.0501808
TCGA-FS-A1Z4		Pre	0	TCGA	854	1			Male	51	Stage I	I/II	WHITE						[Not Available]	1	2549		0.572571	0.7	0.57		0.8703	0.2795	1.0754	2.3986	1.7624	0.0991	138.171	1023.41	-1752.2	Triple_WT	All_Metastases	Regiol_Lymph_Node	not UV	immune	normal-like	MIR.type.2	PROT.type.2	OSC.1	0	0.135048	0.0940863	0.0848513	0.0728324
TCGA-FS-A1Z7		Pre	0	TCGA	237	1			Male	8	Stage IIIC	III	WHITE		Distant Metastasis	Lung		136	[Not Available]	1	381		0.210772	0.39	0.05	0.702105	0.3828	0.014	0.5237	-0.586	-0.6511	0.6027	-861.228	634.275	-2640	BRAF_Hotspot_Mutants	All_Metastases	Regiol_Lymph_Node	UV sigture	MITF-low	hyper-methylated	MIR.type.4	-	OSC.4	0	0.00277964	0.00477508	0.00211677	0
TCGA-FS-A1ZA		Pre	0	TCGA	843	1			Female	34	Stage IIIB	III	WHITE					663	[Not Available]	1	2320		0.22144	0.31	0	4.66376	0.3016	0.025	0.1659	0.5728	-0.5806	0.0918	-584.404	263.538	226.377	NF1_Any_Mutants	All_Metastases	Distant_Metastases	UV sigture	immune	hyper-methylated	MIR.type.2	PROT.type.3	OSC.2	0	0.0682132	0	0.0262064	0.117495
TCGA-FS-A1ZB		Pre	0	TCGA	1486	1			Male	46	Stage II	I/II	WHITE					1461	[Not Available]	1	484		0.336103	0.48	0.13		0.553	0.1325	0.8495	-0.019	0.4114	0.6058	52.9733	1078.86	-1023.75	RAS_Hotspot_Mutants	All_Metastases	Distant_Metastases	UV sigture	keratin	hypo-methylated	MIR.type.1	-	OSC.3	0	0.00886972	0	0.00227993	0.0385781
TCGA-FS-A1ZC		Pre	0	TCGA	10870	1			Male	40	I/II NOS	I/II	WHITE					10334	[Not Available]	1	43		0.0641173	0.11	0.04	1.112	0.725	0.3145	-0.8174	-2.5385	-2.2205	0.2729	-1959.2	1372.06	-2783.29	BRAF_Hotspot_Mutants	All_Metastases	Distant_Metastases	UV sigture	MITF-low	hypo-methylated	MIR.type.1	PROT.type.3	OSC.6	0	0	0.00553263	0	0
TCGA-FS-A1ZD		Pre	0	TCGA	1628	1			Male	52	Stage IIA	Not Available	WHITE					1497	[Not Available]	1	521		0.0702032	0.13	0.04	4.5384	0.7911	-0.008	-0.2625	-1.4706	-1.4736	0.7672	-1535.5	1001.84	-2030.43	BRAF_Hotspot_Mutants	All_Metastases	Regiol_Lymph_Node	UV sigture	MITF-low	CpG island-methylated	MIR.type.4	PROT.type.3	OSC.6	0	0	0.00780939	0.00792719	0
TCGA-FS-A1ZE	NR	Pre	0	TCGA	1413	1			Male	29	Stage IIC	I/II	WHITE					761	[Not Available]	1	2443		0.0456778	0.02	0.03	1.3547	-0.098	-0.052	-0.919	-1.8911	-1.7404	-0.0271	-768.858	323.04	-2910.73	RAS_Hotspot_Mutants	All_Metastases	Distant_Metastases	UV sigture	keratin	CpG island-methylated	MIR.type.4	-	OSC.3	0	0.0648949	0	0	0.0581646
TCGA-FS-A1ZF		Pre	0	TCGA	470	1			Female	67	Stage IIC	I/II	WHITE						[Not Available]	1	2056		0.083744	0.07	0.05		0.8057	0.289	-0.6916	-1.0008	-0.8806	0.0088	-1458.89	713.098	-2104.1	BRAF_Hotspot_Mutants	All_Metastases	Distant_Metastases	UV sigture	MITF-low	hypo-methylated	MIR.type.4	-	OSC.4	0	0.0101766	0	0	0.10588
TCGA-FS-A1ZG		Pre	0	TCGA	295	1			Female	49	Stage IIIC	III	WHITE					140	[Not Available]	1	423		0.0483153	0	0.03		-0.4558	-0.1665	-0.9941	-1.522	-0.4849	-0.8178	-1502.45	-103.812	-2259.86	Triple_WT	All_Metastases	Regiol_Lymph_Node	not UV	keratin	CpG island-methylated	MIR.type.3	PROT.type.2	-	0	0.0709649	0	0.00385906	0.0739058
TCGA-FS-A1ZH		Pre	0	TCGA	996	1			Female	60	Stage IV	IV	WHITE					577	[Not Available]	1	2213		0.34883	0.53	0.06		0.4341	0.0405	0.9136	1.9033	-0.2284	0.8364	-107.244	463.896	-1696.29	BRAF_Hotspot_Mutants	All_Metastases	Regiol_Lymph_Node	not UV	MITF-low	hypo-methylated	MIR.type.2	PROT.type.1	OSC.4	0	0.0752293	0	0.142506	0.186823
TCGA-FS-A1ZJ		Pre	0	TCGA	1441	1			Female	64	Stage I	I/II	WHITE					1225	[Not Available]	1	246		0.105337	0.06	0.07		0.8893	0.2365	-0.2788	-0.0883	-1.3461	-0.2863	-751.629	807.325	-3390.55	Triple_WT	All_Metastases	Regiol_Lymph_Node	not UV	keratin	CpG island-methylated	MIR.type.4	PROT.type.4	OSC.4	0	0.0213404	0	0.002219	0.409968
TCGA-FS-A1ZK		Pre	0	TCGA	728	1			Male	57	Stage II	I/II	WHITE					367	[Not Available]	1	1806		0.0738995	0.1	0.11		0.7618	0.1945	-1.0512	-1.9158	-1.1824	-0.1483	-104.374	1186.24	-1697.67	RAS_Hotspot_Mutants	All_Metastases	Distant_Metastases	UV sigture	keratin	hyper-methylated	MIR.type.3	PROT.type.2	OSC.3	0	0.0131899	0	0	0
TCGA-FS-A1ZM		Pre	0	TCGA	3080	0			Male	63	Stage III	III	WHITE						[Not Available]	0	1585		0.269822	0.01	0.67	3.81347	0.0872	-0.034	0.8844	0.5062	-0.2143	0.5335	252.507	540.168	-1522.41	BRAF_Hotspot_Mutants	All_Metastases	Regiol_Skin_or_Soft_Tissue	UV sigture	immune	hyper-methylated	MIR.type.2	PROT.type.2	OSC.4	0	0	0	0	0.28726
TCGA-FS-A1ZN		Pre	0	TCGA	730	1			Male	32	Stage IIIA	III	WHITE					361	[Not Available]	1	1783	C1	0.0594949	0.05	0	5.83391	-0.0782	-0.032	-0.9117	-1.6182	-0.7455	0.1932	-1750.01	474.993	-2893.87	BRAF_Hotspot_Mutants	All_Primaries	Primary_Disease	UV sigture	keratin	hyper-methylated	MIR.type.4	PROT.type.2	OSC.4	0	0.0140302	0.00159231	0.0005	0
TCGA-FS-A1ZP		Pre	0	TCGA	2273	1			Male	41	Stage II	I/II	WHITE						[Not Available]	1	1155		0.140653	0.19	0.03	2.41598	-0.4318	-0.224	0.5225	0.8889	-0.0512	-0.0407	-794.848	244.434	-2241.43	RAS_Hotspot_Mutants	All_Metastases	Regiol_Lymph_Node	UV sigture	immune	CpG island-methylated	MIR.type.4	PROT.type.1	OSC.2	0	0.0856727	0	0.0208289	0.151738
TCGA-FS-A1ZQ		Pre	0	TCGA	4062	1			Male	20	I/II NOS	I/II	WHITE					3940	[Not Available]	1	1886		0.279867	0.22	0.27		0.0463	0.0715	-0.0752	0.1074	-0.0988	0.1293	-385.984	128.684	-379.191	RAS_Hotspot_Mutants	All_Metastases	Distant_Metastases	UV sigture	keratin	hypo-methylated	MIR.type.1	PROT.type.2	OSC.3	0	0.0446872	0.0109887	0.0315277	0.106449
TCGA-FS-A1ZR		Pre	0	TCGA	347	1			Male	25	Stage II	I/II	WHITE					152	[Not Available]	1	544		0.141211	0.19	0.03		0.3585	0.0615	-0.1524	-0.3791	0.06	0.2011	-958.405	781.735	-2348.38	BRAF_Hotspot_Mutants	All_Metastases	Regiol_Skin_or_Soft_Tissue	UV sigture	keratin	hyper-methylated	MIR.type.1	-	OSC.7	0	0.010302	0	0	0.13942
TCGA-FS-A1ZS	NR	Pre	0	TCGA	4526	0			Male	43	Stage I	I/II	WHITE		Regiol lymph node|Regiol lymph node|Distant Metastasis|Regiol lymph node|Distant Metastasis|Distant Metastasis	[Not Available]|[Not Available]|Lung|[Not Available]|Lung|Liver	[Not Applicable]|[Not Applicable]|[Not Applicable]|[Not Applicable]|[Not Applicable]|[Not Applicable]	2861	[Not Available]	1	1486		0.107601	0.25	0.08		0.0718	0.0285	-0.0988	-1.0978	0.3007	0.5695	-221.243	399.178	-1339.83	BRAF_Hotspot_Mutants	All_Metastases	Regiol_Lymph_Node	UV sigture	MITF-low	hyper-methylated	MIR.type.4	-	OSC.4	0	0.0101193	0	0	0.0198945
TCGA-FS-A1ZT	NR	Pre	0	TCGA	1617	0			Male	44	Stage III	III	WHITE						[Not Available]	0	635		0.31633	0.31	0.31		0.2168	-0.043	0.6131	1.5971	0.1007	-0.1563	287.482	907.644	-2052.97	RAS_Hotspot_Mutants	All_Metastases	Distant_Metastases	UV sigture	immune	normal-like	MIR.type.1	PROT.type.3	OSC.3	0	0.0261171	0.0247315	0.0282042	0.361761
TCGA-FS-A1ZU		Pre	0	TCGA	808	1			Female	59	Stage IIC	I/II	WHITE					679	[Not Available]	1	2339		0.0647261	0.05	0.06	2.76731	0.6067	0.3325	-0.4879	-2.2982	-1.4747	-0.2388	-713.504	1192.19	-3023.93	Triple_WT	All_Metastases	Distant_Metastases	not UV	keratin	CpG island-methylated	MIR.type.4	PROT.type.3	OSC.3	0	0.00480816	0	0.00284101	0
TCGA-FS-A1ZW	NR	Pre	0	TCGA	1505	0			Male	54	Stage IIIB	III	WHITE						[Not Available]	0	530		0.397199	0.38	0.32	4.30764	0.741	0.1265	0.9335	1.7391	0.2814	-0.4429	445.263	1329.82	-1632.57	RAS_Hotspot_Mutants	All_Metastases	Regiol_Lymph_Node	UV sigture	immune	hypo-methylated	MIR.type.3	-	OSC.3	0	0	0.134216	0.209361	0.160129
TCGA-FS-A1ZY		Pre	0	TCGA	824	1			Male	60	Stage IIB	I/II	WHITE						[Not Available]	1	2515		0.0218106	0.03	0		-0.2053	-0.197	-1.2297	-2.4248	-1.2292	-0.0706	-1010.42	402.168	-1493.73	RAS_Hotspot_Mutants	All_Metastases	Distant_Metastases	not UV	keratin	hyper-methylated	MIR.type.4	-	OSC.3	0	0.0202629	0	0	0.202688
TCGA-FS-A1ZZ		Pre	0	TCGA	822	1			Female	43	Stage IIB	I/II	WHITE						[Not Available]	1	2513		0.0495851	0	0.05		0.0416	-0.0065	-1.1356	-1.4239	1.0832	-0.4125	-2098.98	469.941	-1472.33	NF1_Any_Mutants	All_Metastases	Distant_Metastases	UV sigture	keratin	CpG island-methylated	MIR.type.3	-	OSC.2	0	0.0409298	0	0.0862593	0.0947276
TCGA-FS-A4F0	NR	Pre	0	TCGA	2367	0			Female	56	Stage IIB	I/II	WHITE		Locoregiol Recurrence|Locoregiol Recurrence|Locoregiol Recurrence|Distant Metastasis|Distant Metastasis	[Not Available]|[Not Available]|[Not Available]|Lung|Other, Specify	[Not Applicable]|[Not Applicable]|[Not Applicable]|[Not Applicable]|lymphnode	872	[Not Available]	1	2569		0.035148	0.02	0.01		-0.0477	-0.071	-1.3956	-2.5165	1.6801	-0.785	-952.103	-191.769	-2682.59	Triple_WT	All_Metastases	Regiol_Skin_or_Soft_Tissue	UV sigture	keratin	CpG island-methylated	MIR.type.3	-	OSC.3	0	0.0265166	0	0.0008	0
TCGA-FS-A4F2		Pre	0	TCGA	1525	1			Female	35	Stage IIC	I/II	WHITE						[Not Available]	1	549		0.144713	0.24	0.21		0.4289	0.204	-0.1108	-1.0867	-1.2298	-0.0511	-1046.11	648.74	-1768.06	-	All_Metastases	Distant_Metastases	-	immune	hypo-methylated	-	-	-	0	0.00717721	0.0333045	0	0.00831051
TCGA-FS-A4F4		Pre	0	TCGA	2028	1			Male	53	Stage II	I/II	WHITE						[Not Available]	1	979		0.215727	0.21	0.11		0.0237	-0.0235	0.1836	0.1889	-0.43	0.4037	-482.068	109.896	-2438.61	NF1_Any_Mutants	All_Metastases	Distant_Metastases	not UV	immune	hypo-methylated	MIR.type.4	-	OSC.2	0	0.0173035	0	0.0005	0.311677
TCGA-FS-A4F5		Pre	0	TCGA	874	1			Female	66	Stage IB	I/II	WHITE						[Not Available]	1	2571		0.0585561	0.11	0.07		-0.1027	0.0435	-0.5707	-1.705	-0.4518	0.132	-420.576	-98.6112	-2609.48	RAS_Hotspot_Mutants	All_Metastases	Regiol_Skin_or_Soft_Tissue	UV sigture	immune	CpG island-methylated	MIR.type.4	-	OSC.1	0	0	0.0372175	0	0
TCGA-FS-A4F8		Pre	0	TCGA	5318	1			Male	41	Stage I	I/II	WHITE						[Not Available]	1	2155		0.517985	0.63	0.39		0.2137	-0.014	1.0993	2.6852	0.0666	0.3176	-405.955	333.473	-2349.69	BRAF_Hotspot_Mutants	All_Metastases	Distant_Metastases	UV sigture	immune	normal-like	MIR.type.4	-	OSC.4	0	0.061098	0.159958	0.0625827	0.184
TCGA-FS-A4F9		Pre	0	TCGA	1035	0			Male	69	Stage IIIC	III	WHITE		Locoregiol Recurrence|Distant Metastasis	[Not Available]|Brain	[Not Applicable]|[Not Applicable]	376	[Not Available]	1	1835		0.0638176	0.07	0		0.5563	0.2395	-0.827	-1.4369	-1.3742	-0.6211	-169.054	944.771	-3065.26	RAS_Hotspot_Mutants	All_Metastases	Regiol_Lymph_Node	UV sigture	keratin	CpG island-methylated	-	-	OSC.1	0	0.120847	0	0.0657143	0.0646061
TCGA-FS-A4FB		Pre	0	TCGA	813	1			Female	35	Stage III	III	WHITE						[Not Available]	1	2504		0.0406737	0.06	0.02		0.5309	0.138	-0.9766	-1.9174	-1.0991	-0.0431	-368.657	383.405	-2834.91	BRAF_Hotspot_Mutants	All_Metastases	Regiol_Lymph_Node	UV sigture	MITF-low	hypo-methylated	MIR.type.4	-	OSC.7	0	0.0302436	0	0.0103766	0.0244449
TCGA-FS-A4FC		Pre	0	TCGA	1655	1			Female	64	Stage IIA	Not Available	WHITE						[Not Available]	1	668		0.216564	0.41	0		-0.0524	0.0005	-0.1407	-0.3288	0.5054	0.418	-662.284	617.142	-1305.23	RAS_Hotspot_Mutants	All_Metastases	Regiol_Skin_or_Soft_Tissue	UV sigture	keratin	CpG island-methylated	-	-	OSC.1	0	0.00997822	0	0.00307544	0.137447
TCGA-FS-A4FD		Pre	0	TCGA	2454	1			Male	28	Stage IIIC	III	WHITE		Distant Metastasis|Distant Metastasis|Distant Metastasis|Distant Metastasis	Lung|Lung|Bone|Brain	[Not Applicable]|[Not Applicable]|[Not Applicable]|[Not Applicable]	2010	[Not Available]	1	965		0.104606	0.18	0.19		0.7182	0.0565	-0.2326	0.1131	-0.9171	-0.1011	139.195	796.43	-2470.65	RAS_Hotspot_Mutants	All_Metastases	Regiol_Lymph_Node	UV sigture	keratin	normal-like	MIR.type.4	-	OSC.3	0	0.0642805	0	0.078601	0.202684
TCGA-FW-A3I3		Pre	0	TCGA	531	0			Female	48	Stage IV	IV	WHITE						[Not Available]	0	2154		0.0549265	0.11	0.2	1.19697	0.3657	0.1865	-0.7301	-0.4141	-0.3498	-0.0147	33.9245	1110.27	-2675.94	NF1_Any_Mutants	All_Metastases	Distant_Metastases	not UV	keratin	hyper-methylated	MIR.type.4	PROT.type.2	OSC.2	0	0.0367749	0	0.0153724	0.130048
TCGA-FW-A3R5	R	Pre	0	TCGA	1124	0			Male	57	Stage III	III	WHITE						[Not Available]	0	143		0.305697			2.13445	0.7957	0.356	0.0564	0.4328	-0.8739	-0.0646	-1687.12	1322.35	-2610.73	-	All_Metastases	Regiol_Lymph_Node	UV sigture	immune	CpG island-methylated	MIR.type.1	-	OSC.2	0	0.104049	0	0.0310373	0.0845083
TCGA-FW-A3TU		Pre	0	TCGA	1691	1			Female	61	[Not Available]	Not Available	WHITE						[Not Available]	1	700		0.149642	0.16	0.15	0.189445	-0.5724	-0.1875	-0.2793	0.1679	-1.2562	-0.4447	-228.003	-416.902	149.103	NF1_Any_Mutants	All_Metastases	Distant_Metastases	UV sigture	keratin	CpG island-methylated	MIR.type.1	-	OSC.2	0	0.105963	0	0.0616789	0.0824589
TCGA-FW-A3TV		Pre	0	TCGA	411	0			Female	46	Stage IIIB	III	WHITE		Locoregiol Recurrence			139	[Not Available]	1	412		0.367138	0.36	0.05	2.48844	-0.2728	-0.06	0.1985	0.8111	-0.271	-0.1578	-266.006	174.022	-1898.64	BRAF_Hotspot_Mutants	All_Metastases	Regiol_Lymph_Node	UV sigture	immune	normal-like	MIR.type.2	PROT.type.2	OSC.7	0	0.197103	0	0.0610114	0.161207
TCGA-FW-A5DX		Pre	0	TCGA	640	0			Male	60	Stage IIIC	III	WHITE						[Not Available]	0	2291	C4	0.0538376	0.14	0.18	1.41112	1.006	0.16	-0.5344	-1.0613	-0.7639	-0.3055	-90.7498	872.026	-1779.59	BRAF_Hotspot_Mutants	All_Primaries	Primary_Disease	UV sigture	MITF-low	hyper-methylated	MIR.type.3	-	OSC.4	0	0.098961	0	0.00761088	0.0869868
TCGA-FW-A5DY		Pre	0	TCGA	587	0			Female	37	Stage III	III	WHITE						[Not Available]	0	2224		0.762213	0.84	0.18	24.5841	0.0086	-0.033	1.0485	2.8009	0.2848	-0.0981	-79.8952	-633.446	-2582.58										0	0.354688	0	0.118332	0.156378
TCGA-GF-A2C7		Pre	0	TCGA	21	0			Male	37	Stage IIC	I/II	WHITE						[Not Available]	0	1033	C1	0.0723698	0.15	0.08	15.233	0.6013	0.104	-0.9501	-1.9908	-1.7306	0.1178	-1313.49	875.75	-2752.61	BRAF_Hotspot_Mutants	All_Primaries	-	UV sigture	keratin	CpG island-methylated	MIR.type.3	PROT.type.1	OSC.6	0	0.00566241	0	0	0
TCGA-GF-A3OT	NR	Pre	0	TCGA	301	0			Female	47	Stage IIIC	III	WHITE		Distant Metastasis	Lung		248	[Not Available]	1	1282		0.462898	0.53	0.01	1.38152	0.6521	0.3555	0.2078	-0.0948	-0.6208	0.682	-164.762	716.913	-1236.79	RAS_Hotspot_Mutants	All_Metastases	Regiol_Lymph_Node	UV sigture	immune	normal-like	MIR.type.2	PROT.type.1	OSC.3	1	0.0137622	0	0.00287818	0.166146
TCGA-GF-A4EO	R	Pre	0	TCGA	591	0			Female	63	Stage IIIC	III	WHITE						[Not Available]	0	2229		0.579089	0.78	0.33	18.1938	0.159	-0.015	1.6023	2.8286	0.4521	-0.0633	822.568	-239.194	-3173.35	BRAF_Hotspot_Mutants	All_Metastases	Regiol_Lymph_Node	UV sigture	immune	normal-like	MIR.type.2	-	OSC.5	0	0	0.0495996	0.0155175	0.322685
TCGA-GF-A6C8		Pre	0	TCGA	62	0			Female	51	Stage IIB	I/II	WHITE						[Not Available]	0	2263		0.304616	0.33	0.06	0.532685	0.6427	0.3425	0.1864	0.7899	1.3857	0.0635	-874.5	367.397	-3558.13										0	0.0070372	0.00351303	0.0175152	0.251066
TCGA-GF-A6C9	R	Pre	0	TCGA	480	0			Male	67	Stage IIIB	III	WHITE						[Not Available]	0	2071		0.6217	0.68	0.51	22.2848	0.4508	0.158	1.4721	2.6274	1.2027	0.4816	-17.0003	130.478	-2954.39										0	0.11454	0.111878	0.0429546	0.0905337
TCGA-GF-A769		Pre	0	TCGA	1070	1			Male	28	Stage IIC	I/II	WHITE						[Not Available]	1	83	C4	0.116118	0.14	0.06	4.08215	0.6958	0.158	-0.4736	-2.0473	-1.0765	0.2618	-466.162	726.465	-1437.48										0	0	0.0106891	0	0.0439527
TCGA-GN-A262		Pre	0	TCGA	4255	0			Female	36	[Not Available]	Not Available	WHITE		Locoregiol Recurrence			2908	[Not Available]	1	1509		0.01658	0	0.02	3.68619	0.2022	0.1065	-2.0104	-3.3077	-1.6238	-0.6633	-1483.78	338.748	-1856.86	BRAF_Hotspot_Mutants	All_Metastases	Regiol_Skin_or_Soft_Tissue	UV sigture	MITF-low	hyper-methylated	MIR.type.4	PROT.type.2	OSC.7	0	0.102984	0	0	0
TCGA-GN-A263		Pre	0	TCGA	467	1			Male	13	Stage IV	IV	WHITE		Distant Metastasis	Liver		39	[Not Available]	1	1875	C2	0.41682	0.47	0	1.56828	0.5348	0.285	0.0707	-0.5577	0.8539	-0.274	-142.015	968.255	-4252.33	BRAF_Hotspot_Mutants	All_Primaries	Primary_Disease	UV sigture	immune	hypo-methylated	MIR.type.1	PROT.type.1	OSC.7	0	0.0115024	0	0.00423524	0.0468257
TCGA-GN-A264		Pre	0	TCGA	3587	1			Male	49	[Not Available]	Not Available	WHITE		Distant Metastasis	Lung		3221	[Not Available]	1	1639		0.106169	0.17	0.07	11.3222	0.0745	-0.042	-0.2431	-1.2938	-1.4513	0.084	-1966.11	518.765	-2226.43	Triple_WT	All_Metastases	Regiol_Lymph_Node	not UV	keratin	CpG island-methylated	MIR.type.1	PROT.type.3	OSC.2	0	0	0.00683729	0.0003	0.0322992
TCGA-GN-A265		Pre	0	TCGA	2948	0			Male	42	[Not Available]	Not Available	WHITE		Regiol lymph node			99	[Not Available]	1	2698		0.610354	0.83	0.26	9.27396	0.5647	0.2735	1.3534	2.0247	0.9838	0.7552	680.379	985.93	-1239.87	BRAF_Hotspot_Mutants	All_Metastases	Regiol_Lymph_Node	not UV	immune	normal-like	MIR.type.2	PROT.type.1	OSC.4	0	0.0291807	0	0.0048464	0.0451197
TCGA-GN-A266		Pre	0	TCGA	308	1			Male	34	[Not Available]	Not Available	WHITE		Distant Metastasis	Brain		109	[Not Available]	1	103		0.356051	0.46	0.47	5.53793	0.5586	0.074	1.2357	1.2347	0.4537	0.7905	-384.315	947.7	-1423.65	NF1_Any_Mutants	All_Metastases	Regiol_Skin_or_Soft_Tissue	UV sigture	immune	normal-like	MIR.type.2	PROT.type.3	OSC.2	0	0	0.0373151	0.00130178	0.061524
TCGA-GN-A267		Pre	0	TCGA	1960	1			Male	27	Stage IIIA	III	WHITE		Locoregiol Recurrence			456	[Not Available]	1	2024		0.225336	0.26	0.32	8.88698	0.3206	0.179	0.0219	0.7443	0.3552	-0.2474	-314.83	991.803	-3130.11	RAS_Hotspot_Mutants	All_Metastases	Regiol_Lymph_Node	UV sigture	immune	CpG island-methylated	MIR.type.3	PROT.type.1	OSC.3	0	0	0.0551305	0	0.444458
TCGA-GN-A268		Pre	0	TCGA	1910	1			Female	72	Stage IIB	I/II	WHITE		Locoregiol Recurrence			908	[Not Available]	1	2609		0.0461499	0.01	0.41	7.65074	0.7571	0.2415	-0.9101	-1.6438	-0.5999	-0.4655	-792.028	1518.39	-1652.34	RAS_Hotspot_Mutants	All_Metastases	Regiol_Lymph_Node	UV sigture	keratin	CpG island-methylated	MIR.type.4	PROT.type.3	OSC.1	0	0.00340923	0	0.00124428	0.140719
TCGA-GN-A26A		Pre	0	TCGA	988	1			Female	52	Stage IIIA	III	WHITE		Distant Metastasis	Lung		750	[Not Available]	1	2430		0.369589	0.52	0.03	2.89227	0.0888	0.0735	0.8118	-0.2744	-0.1578	0.5865	926.275	-202.951	1635.18	Triple_WT	All_Metastases	Regiol_Skin_or_Soft_Tissue	UV sigture	MITF-low	hypo-methylated	MIR.type.2	PROT.type.2	OSC.3	0	0	0.00341878	0.0015867	0.071406
TCGA-GN-A26C		Pre	0	TCGA	821	1			Male	66	Stage IIIC	III	WHITE		Distant Metastasis	Lung		593	[Not Available]	1	2232	C2	0.457864	0.62	0.18	10.6315	0.1264	-0.001	1.2837	2.1229	1.6557	0.5091	-356.158	166.609	-2186.94	NF1_Any_Mutants	All_Primaries	Primary_Disease	UV sigture	immune	normal-like	MIR.type.2	PROT.type.3	OSC.2	0	0.0314946	0	0.0275987	0.319342
TCGA-GN-A26D		Pre	0	TCGA	1460	1			Female	61	Stage IIC	I/II	WHITE		Locoregiol Recurrence			622	[Not Available]	1	2267		0.125941	0.22	0.22	3.54273	0.393	0.0355	-0.3743	-0.1274	-0.7456	-0.078	-28.178	1142.32	-1338.94	Triple_WT	All_Metastases	Regiol_Lymph_Node	not UV	immune	normal-like	MIR.type.2	PROT.type.3	OSC.4	0	0.158016	0	0.0351796	0.0834432
TCGA-GN-A4U3	NR	Pre	0	TCGA	3708	0			Male	19	Stage III	III	WHITE		Distant Metastasis|Distant Metastasis	Lung|Brain	[Not Applicable]|[Not Applicable]	2274	[Not Available]	1	1156		0.0930038	0.15	0.05	4.72426	0.4041	0.1705	-0.6322	-1.1573	-0.7575	-0.4165	105.411	743.864	-2823.6										0	0.105462	0	0.0128544	0.0715048
TCGA-GN-A4U4	R	Pre	0	TCGA	1197	0			Male	62	Stage IIA	Not Available	WHITE		Distant Metastasis	Liver		217	[Not Available]	1	1079		0.218073	0.24	0	5.9545	0.1564	0.0365	-0.5732	0.0576	-1.1566	-0.4052	-29.6923	522.953	-3058.01										1	0.108982	0.0849584	0	0.0597035
TCGA-GN-A4U5	R	Pre	0	TCGA	1156	0			Female	50	Stage IB	I/II	WHITE						[Not Available]	0	176	C2	0.448698	0.54	0.01	4.33969	-0.1852	-0.0145	0.6236	0.7469	1.5254	0.2476	-34.9759	387.957	-2030.27										0	0	0	0.00175221	0.516948
TCGA-GN-A4U7		Pre	0	TCGA	317	1			Female	45	Stage IIIC	III	WHITE		Distant Metastasis	Lung		183	[Not Available]	1	816		0.0966247	0.1	0.11	9.25257	0.4981	0.32	-1.153	-1.7445	-1.2619	-0.4459	-851.687	216.658	-508.247										0	0	0.0551128	0.00264265	0
TCGA-GN-A4U8	R	Pre	0	TCGA	1487	0			Male	40	[Not Available]	Not Available	WHITE						[Not Available]	0	511		0.411906	0.48	0		0.6302	0.2635	0.8965	2.1603	0.628	-0.3119	-536.325	873.832	-4293.69										0	0.0812328	0	0.0367325	0.259996
TCGA-GN-A4U9	NR	Pre	0	TCGA	673	1			Male	60	Stage IIIC	III	WHITE		Locoregiol Recurrence			151	[Not Available]	1	534		0.1162	0.13	0.22	9.39235	1.0595	0.3885	-0.3049	-0.4609	-1.3022	-0.1127	-1960.33	1714.31	-3501.35										0	0.0209481	0	0.00217241	0.0413067
TCGA-GN-A8LK	NR	Pre	0	TCGA	1524	1			Male	59	Stage IB	I/II	WHITE		Locoregiol Recurrence			436	[Not Available]	1	1988		0.0475856	0.05	0.46	3.31233	0.3155	0.148	-1.8633	-2.0639	-1.783	-0.7331	-804.364	42.5422	-1600.72										0	0	0	0	0.253832
TCGA-GN-A8LL		Pre	0	TCGA	650	1			Female	57	Stage IIC	I/II	WHITE						[Not Available]	1	2305		0.077719	0.07	0.05	7.74729	-0.4506	-0.2065	-1.346	-0.5778	-1.0138	-0.5307	-221.017	264.147	-515.969										0	0.0790877	0	0.046316	0.259519
TCGA-GN-A8LN		Pre	1	TCGA	772	0			Male	57	Stage IIC	I/II	WHITE		New primary melanoma			186	[Not Available]	1	842	C1	0.10691	0.14	0.19	9.32623	0.1361	0.0515	0.02	-0.5611	-0.5265	0.2669	-679.702	90.3656	-2573.65										1	0.0281322	0	0	0.0480488
TCGA-GN-A9SD	R	Pre	0	TCGA	1807	1			Female	48	Stage IA	I/II	WHITE		Locoregiol Recurrence			1137	[Not Available]	1	156		0.552947	0.6	0.3	9.37777	-0.0201	0	1.0184	2.5113	-0.1259	0.1028	-182.76	258.896	-2178.98										0	0.18509	0	0.0737072	0.183525
TCGA-HR-A2OG		Pre	0	TCGA	7	0			Female	39	[Not Available]	Not Available	[Not Evaluated]						[Not Available]	0	2367		0.355932				-0.0752	0	0.6629	1.3413	-0.2642	0.7768	180.106	190.521	-3548.85										0	0	0.0416096	0.00305793	0.130089
TCGA-HR-A2OH	NR	Pre	0	TCGA	2004	1			Female	35	Stage IIIB	III	[Not Evaluated]						[Not Available]	1	959		0.486811				0.4524	-0.0015	1.6493	2.3009	1.1174	-0.2223	1061.89	1066.99	-1232.48										0	0.0117308	0	0.0108333	0.460219
TCGA-HR-A5NC		Pre	0	TCGA	1000	0			Female	79	[Not Available]	Not Available	[Not Evaluated]		Locoregiol Recurrence			154	[Not Available]	1	563	C4	0.155092	0.22	0.03	0.116836	-0.2121	-0.066	-0.2613	-1.6998	-0.9222	0.2269	-830.868	-447.618	-2003.18	-	All_Primaries	-	-	keratin	hyper-methylated	MIR.type.3	-	-	0	0	0	0.0165439	0.0316804
TCGA-IH-A3EA		Pre	0	TCGA	524	0			Male	50	Stage IIC	I/II	WHITE		Distant Metastasis	Brain		314	[Not Available]	1	1610	C1	0.236664	0.25	0.01	4.84008	0.2066	0.181	-0.5027	-1.0182	-1.1307	-0.205	-17.9493	352.143	-603.113	BRAF_Hotspot_Mutants	All_Primaries	Primary_Disease	UV sigture	keratin	CpG island-methylated	MIR.type.1	PROT.type.1	OSC.6	0	0.00196029	0.00348479	0.00204556	0.0775652
TCGA-LH-A9QB		Pre	0	TCGA	11217	0			Female	13	[Not Available]	Not Available	WHITE						[Not Available]	0	140		0.0409519	0.05	0.09	2.34037	-0.3102	-0.068	-0.8461	-1.4944	-0.6492	0.2914	-649.681	170.139	-1824.1										0	0.0803163	0	0	0
TCGA-OD-A75X		Pre	0	TCGA	9061	1			Male	38	[Not Available]	Not Available	WHITE		Distant Metastasis|Distant Metastasis|Distant Metastasis	Brain|Other, Specify|Lung	[Not Applicable]|stomach|[Not Applicable]	8987	[Not Available]	1	2597		0.0962008	0.17	0.22	4.59616	0.9428	0.2265	-0.1768	-0.8356	0.5495	-0.0256	-610.731	621.789	-1177.45										0	0	0.00940375	0.0002	0.047769
TCGA-QB-A6FS		Pre	0	TCGA	220	0			Male	38	Stage IIIC	III	WHITE		Distant Metastasis	Other, Specify	SKIN, MID CHEST	63	[Not Available]	1	2276		0.435625	0.56	0.05	3.22824	-0.2243	-0.1355	0.5975	1.9691	-0.2122	-0.1205	306.165	-257.526	-148.084										0	0.112944	0	0.068613	0.295413
TCGA-QB-AA9O	NR	Pre	0	TCGA	549	1			Male	62	Stage IIIC	III	WHITE						[Not Available]	1	2179		0.267483	0.38	0.26	1.11296	0.3831	0.2145	0.3857	1.3798	-0.6495	-0.2778	-214.72	165.1	-1364.06										1	0.012189	0	0.00650419	0.336673
TCGA-RP-A690		Pre	0	TCGA	6	0			Female	55	[Not Available]	Not Available	WHITE						[Not Available]	0	2239		0.0643804	0.04	0.02	1.473	-1.4402	-0.263	-0.4409	-1.3236	-1.4202	-0.5134	-1265.65	-1279.73	-523.238										0	0.00174843	0.00341582	0.0224959	0.0631517
TCGA-RP-A693		Pre	0	TCGA	10	0			Male	66	Stage IV	IV	WHITE						[Not Available]	0	4		0.423166	0.68	0.04	7.87412	0.2658	0.0035	0.6643	1.3839	0.5733	0.0942	44.9132	-107.776	-3478.46										0	0.00252448	0.0110719	0.0378844	0.199272
TCGA-RP-A694		Pre	0	TCGA	21	0			Male	60	Stage IV	IV	WHITE						[Not Available]	0	1033		0.319889	0.35	0.03	2.75909	0.3366	0.1365	0.169	0.4504	-0.7659	-0.243	178.065	873.745	-2271.39										0	0.0236188	0	0.0411381	0.272866
TCGA-RP-A695		Pre	0	TCGA		0			Male	1	Stage IV	IV	WHITE						[Not Available]	0	1		0.24295	0.37	0.04	10.4631	0.173	0.154	-0.0937	0.0233	-1.0292	-0.3123	186.776	254.948	-702.254										0	0.0249432	0	0.0348607	0.400505
TCGA-RP-A6K9		Pre	0	TCGA		0			Female	1	[Not Available]	Not Available	WHITE						[Not Available]	0	1		0.289318	0.53	0.14	0.914945	-1.0346	-0.281	0.3278	0.6291	-0.6599	-0.1932	-398.692	-1071.4	-2715.55										0	0.01149	0	0.0272186	0.423404
TCGA-W3-A824	NR	Pre	0	TCGA	6940	0			Male	52	Stage I	I/II	WHITE		Distant Metastasis	Other, Specify	Spleen	2406	[Not Available]	1	1240		0.183914	0.25	0.04	28.7913	0.1097	0.139	0.3034	0.9146	1.3403	-0.3148	84.8975	123.279	-3064.91										0	0.0168867	0	0.00263504	0.452601
TCGA-W3-A825	R	Pre	0	TCGA	1917	1			Female	49	Stage II	I/II	WHITE						[Not Available]	1	888		0.22337	0.31	0.32	9.69364	0.5212	0.176	0.6351	1.1073	-0.8096	0.9255	-540.471	266.763	-2983.91										0	0.0611983	0	0.0345658	0.251455
TCGA-W3-A828		Pre	0	TCGA	3683	1			Male	55	Stage II	I/II	WHITE						[Not Available]	0	1810		0.213148	0.34	0.12	1.12485	0.1162	0.015	0.1587	-0.3658	-0.491	0.9343	81.032	713.659	-2175.7										0	0.0453671	0	0	0.0391127
TCGA-W3-AA1O	NR	Pre	0	TCGA	122	1			Male	74	Stage III	III	WHITE						[Not Available]	1	240		0.160253	0.23	0.16	2.41801	0.8475	0.2805	-0.4328	-1.3533	-0.696	-0.2061	-749.79	1130.42	-2554.5										0	0.00692124	0.0109517	0	0.0260561
TCGA-W3-AA1Q		Pre	0	TCGA	2101	1			Male	46	Stage III	III	WHITE		Distant Metastasis	Other, Specify	Thigh	1066	[Not Available]	1	78		0.271616	0.29	0.04	8.3955	-0.5257	-0.0235	0.0809	0.8591	-0.5181	-0.4404	-20.7035	225.053	-2806.09										0	0.0211571	0	0.00200682	0.296701
TCGA-W3-AA1R	NR	Pre	0	TCGA	3379	1			Male	60	Stage II	I/II	WHITE		Distant Metastasis	Lung		1037	[Not Available]	1	47		0.179841	0.15	0.23	2.81523	0.8738	0.358	-0.3502	0.1779	-0.4106	-0.6477	-805.738	759.737	-2091.83										0	0.0460622	0	0.0224727	0.35805
TCGA-W3-AA1V	NR	Pre	0	TCGA	1280	1			Male	52	Stage II	I/II	WHITE		Distant Metastasis	Liver		1219	[Not Available]	1	239		0.21132	0.27	0.12	2.76982	1.0736	0.3705	0.3059	-0.3182	0.1836	0.1151	-831.889	1616.39	-1381.84										0	0.00585605	0	0.00264333	0.0553142
TCGA-W3-AA1W	NR	Pre	0	TCGA	6666	0			Male	53	Stage II	I/II	WHITE		Regiol lymph node			335	[Not Available]	1	1698		0.516162	0.63	0.02	1.99001	0.0253	-0.0385	1.4902	2.7087	1.4073	-0.4612	1102.68	512.944	-2205.4										0	0.0300283	0	0.00546411	0.486924
TCGA-W3-AA21		Pre	0	TCGA	3195	1			Male	15	Stage I	I/II	WHITE		Distant Metastasis	Other, Specify	Chest	2952	[Not Available]	1	1526		0.120421	0.11	0.28	18.548	0.0715	0.189	-1.0623	0.0458	0.1137	-0.4776	-829.073	4.37471	-156.16										0	0.0458166	0	0	0.297632
TCGA-WE-A8JZ		Pre	0	TCGA	731	0			Male	59	Stage IIIB	III	[Not Evaluated]						[Not Available]	0	2408		0.105394	0.16	0.07	13.6866	-0.0707	-0.0095	-0.5468	-0.3156	-0.8108	-0.051	-1251.86	68.0851	2554.68										0	0.041043	0	0	0.12622
TCGA-WE-A8K1		Pre	0	TCGA	1492	0			Male	63	Stage IIIC	III	WHITE						[Not Available]	0	516		0.464748	0.56	0.17	12.381	0.5729	0.1095	0.6228	1.5591	0.7891	-0.2873	500.6	1127.46	1444.9										0	0.0252125	0	0.00855638	0.326711
TCGA-WE-A8K4		Pre	0	TCGA	614	0			Male	74	Stage IIB	I/II	WHITE						[Not Available]	0	2257	C2	0.46326	0.48	0.01	24.1924	0.2088	-0.014	0.414	0.9646	1.6539	-0.5591	250.805	43.9785	-2584.68										0	0	0.041585	0	0.631613
TCGA-WE-A8K5	NR	Pre	0	TCGA	1860	1			Male	54	Stage IV	IV	WHITE		Distant Metastasis	Brain		1498	[Not Available]	1	522		0.161767	0.28	0.01	5.26538	0.8173	0.204	-0.0051	0.0016	-0.4359	0.2418	-990.778	1114.34	-2689.2										1	0	0.0164775	0.0003	0.193811
TCGA-WE-A8K6		Pre	0	TCGA	546	0			Male	68	Stage IIIB	III	WHITE		Distant Metastasis	Liver		256	[Not Available]	1	1331		0.0871162	0.2	0.05	5.37679	-0.987	-0.0355	-0.3697	-1.1604	0.0833	0.3392	-350.148	-699.285	-3447.71										0	0.00196271	0.00201003	0	0
TCGA-WE-A8ZM		Pre	0	TCGA	3082	0			Male	59	Stage IIIB	III	WHITE		Locoregiol Recurrence			646	[Not Available]	1	2300		0.0421729	0.15	0.07	0.255789	-0.4924	-0.1935	-0.9038	-1.7932	-1.1185	0.2547	-978.194	-629.049	-1561.83										0	0.0130743	0	0.00549578	0
TCGA-WE-A8ZN	NR	Pre	1	TCGA	1794	0			Male	46	Stage IIB	I/II	[Not Evaluated]					1449	[Not Available]	1	471		0.428936	0.49	0	10.8335	0.2549	0.147	0.4548	1.3921	-0.0089	0.0112	-41.0246	486.144	-2761.59										1	0.019831	0	0.00398925	0.298748
TCGA-WE-A8ZO	R	Pre	0	TCGA	2145	0			Female	62	Stage IIIB	III	[Not Evaluated]		Regiol lymph node			1371	[Not Available]	1	393		0.203618	0.19	0.01	8.98175	0.0619	-0.053	0.5886	0.6084	0.5517	-0.2764	222.64	330.817	2909.9										0	0	0.0232523	0	0.22826
TCGA-WE-A8ZQ		Pre	0	TCGA	1923	0			Male	37	Stage IIA	Not Available	[Not Evaluated]		Distant Metastasis|Distant Metastasis	Lung|Other, Specify	[Not Applicable]|left thigh	1757	[Not Available]	1	754		0.0378529	0.06	0.16	4.2859	0.2566	0.0665	-0.8815	-2.5112	-1.1774	0.1878	-596.758	319.295	-3942.01										0	0.00318251	0.00739991	0.00211921	0.0322781
TCGA-WE-A8ZR	NR	Pre	0	TCGA	274	1			Male	38	Stage IIIC	III	WHITE		Distant Metastasis|Distant Metastasis|Distant Metastasis|Distant Metastasis|Locoregiol Recurrence	Liver|Lung|Bone|Other, Specify|Other, Specify	[Not Applicable]|[Not Applicable]|[Not Applicable]|spleen|subcutaneous chest wall	126	[Not Available]	1	283		0.198265			4.81685	0.6582	0.15	-0.1038	0.6643	-0.5786	-0.2234	-309.549	672.948	-1956.63										0	0.140158	0	0.096532	0.0519504
TCGA-WE-A8ZT		Pre	0	TCGA	359	0			Female	14	Stage IV	IV	WHITE		Locoregiol Recurrence			69	[Not Available]	1	2355		0.181417	0.19	0.04	16.3045	0.0333	-0.064	-0.7656	-0.1489	-0.9566	-0.4416	-1369.63	36.6375	-3318.62										0	0.255371	0	0.0590209	0.155722
TCGA-WE-A8ZX	R	Pre	0	TCGA	1089	0			Male	34	Stage IIIB	III	WHITE		Locoregiol Recurrence			326	[Not Available]	1	1661		0.297057	0.38	0.01	16.456	0.9384	0.399	0.6013	1.3693	-0.516	-0.2044	-621.919	1108.05	-2506.94										0	0.0207152	0	0.0120809	0.388202
TCGA-WE-A8ZY		Pre	0	TCGA	1506	1			Male	51	Stage IIA	Not Available	WHITE		Distant Metastasis|[Not Available]	Liver|[Not Available]	[Not Applicable]|[Not Applicable]	1389	[Not Available]	1	411		0.134619	0.19	0.11	3.16666	0.594	0.1375	-0.2833	-0.6874	0.7878	-0.1919	-462.843	1077.03	-2665.57										0	0.0900064	0	0	0.0780034
TCGA-WE-AA9Y		Pre	0	TCGA	370	0			Male	26	Stage IIIC	III	WHITE						[Not Available]	0	1815		0.492672	0.72	0.11	1.82357	-0.1335	0.066	0.4416	1.1893	-1.1918	0.5234	-859.083	354.879	-1567.79										0	0.121804	0	0.0503411	0.114209
TCGA-WE-AAA0	R	Pre	1	TCGA	1229	0			Male	36	Stage IA	I/II	WHITE		Distant Metastasis|Distant Metastasis	Other, Specify|Brain	Spleen|[Not Applicable]	650	[Not Available]	1	2305		0.365937	0.39	0.06	18.8492	0.2738	0.1105	-0.022	1.111	1.0424	-0.2462	194.895	548.143	-1267.84										1	0.276819	0	0.0348155	0.0721619
TCGA-WE-AAA3		Pre	0	TCGA	651	0			Female	73	Stage IIIC	III	WHITE						[Not Available]	0	2306		0.292481	0.51	0.02	6.00887	-0.0833	-0.0375	0.5432	0.6646	-0.4138	0.027	485.226	252.203	92.1368										0	0.0147372	0	0.00136038	0.392842
TCGA-WE-AAA4	NR	Pre	0	TCGA	760	0			Female	45	Stage IIIC	III	WHITE		Distant Metastasis|Locoregiol Recurrence	Brain|[Not Available]	[Not Applicable]|[Not Applicable]	523	[Not Available]	1	2138		0.579939	0.64	0.22	0.152953	-0.3462	-0.1735	1.3334	2.0661	0.5335	0.2371	776.896	-132.272	-76.4436										1	0.024479	0	0.0036773	0.415815
TCGA-XV-A9VZ		Pre	0	TCGA	11	0			Female	79	Stage II	I/II	WHITE						[Not Available]	0	114	C1	0.0784157	0.33	0.08	0.894527	0.0739	-0.0095	-1.2338	-1.3338	-1.0684	0.1429	-783.817	719.774	-1633.94										0	0	0	0.00145139	0.0365004
TCGA-XV-A9W2		Pre	0	TCGA	417	0			Male	70	Stage I	I/II	WHITE						[Not Available]	0	1944	C2	0.317961	0.46	0.32	3.78107	0.7784	0.4095	-0.7181	-0.9172	0.3328	-0.0534	-1227.29	541.085	-1202.19										0	0.018742	0	0.00439537	0.033448
TCGA-XV-A9W5		Pre	0	TCGA	392	0			Male	40	I/II NOS	I/II	WHITE						[Not Available]	0	1878	C1	0.273895	0.28	0.03	1.79102	0.434	0.1255	-0.2777	-0.4839	0.063	0.5842	-124.375	280.382	-3217.39										0	0.00145461	0	0.00414035	0.254361
TCGA-XV-AAZV		Pre	0	TCGA	412	0			Female	45	Stage II	I/II	WHITE						[Not Available]	0	1935	C6	0.477338	0.47	0.06	6.3127	-0.14	0.022	0.8741	0.4502	0.5166	0.5471	654.476	-390.679	-1732.21										0	0	0.032878	0	0.22048
TCGA-XV-AAZW		Pre	0	TCGA	393	1			Female	51	Stage II	I/II	WHITE						[Not Available]	1	1881	C1	0.0739466	0.16	0	1.99233	0.4167	0.3435	-0.9895	-1.8732	-0.787	0.2754	-1198.22	883.719	-3924.63										0	0.00838642	0	0	0
TCGA-XV-AAZY		Pre	0	TCGA	405	0			Female	65	Stage IIIC	III	WHITE						[Not Available]	0	1916	C2	0.467324	0.54	0	2.70701	-0.3294	-0.0315	-0.065	1.0844	0.4411	-0.0389	-901.028	-198.312	-1536.75										0	0.0335444	0.0111292	0.00741513	0.245307
TCGA-XV-AB01		Pre	0	TCGA	403	0			Female	43	Stage II	I/II	WHITE						[Not Available]	0	1914		0.0853229			3.80406	-1.2875	-0.5245	-0.0712	1.0279	-1.8225	0.2048	-1220.93	-481.781	-781.725										0	0.0961195	0.00453515	0.0578232	0.286376
TCGA-YD-A89C		Pre	0	TCGA	210	0			Female	32	Stage IA	I/II	WHITE						[Not Available]	0	1034		0.26778	0.22	0.01	26.7987	0.6268	0.311	-1.0954	-1.5057	-2.7195	0.1972	-1752.89	667.912	-3443.38										0	0.0314062	0	0.0105878	0.078806
TCGA-YD-A9TA		Pre	0	TCGA	1496	0			Male	64	[Not Available]	Not Available	WHITE						[Not Available]	0	520		0.204822	0.29	0.32	16.0365	0.9038	0.2565	0.4372	1.0774	-0.5698	0.3177	-1566.74	545.368	-2324.18										0	0.160879	0	0.0335493	0.0976763
TCGA-YD-A9TB		Pre	0	TCGA		0			Female	1	[Not Available]	Not Available	WHITE						[Not Available]	0	1		0.168643	0.4	0.15	4.61261	0.1178	-0.0055	0.2709	0.1158	-0.4134	0.3058	-91.6113	752.304	-3578.08										0	0.0589195	0	0.0385534	0.136794
TCGA-YG-AA3N		Pre	0	TCGA	306	0			Male	56	Stage IIC	I/II	[Unknown]						[Not Available]	0	1577	C3	0.335416	0.34	0.02	5.84273	-0.5027	-0.082	0.6163	1.5156	0.0667	-0.0032	-269.299	-355.692	-883.335										0	0.0116904	0	0.00471153	0.631203
TCGA-YG-AA3O		Pre	0	TCGA	1154	1			Male	51	[Not Available]	Not Available	[Unknown]		Regiol lymph node			999	[Not Available]	1	2708		0.205438	0.38	0.35	0.365005	0.3222	0.077	-0.0483	0.0956	-1.391	-0.3408	-1003.49	708.503	-2546.06										0	0.00898874	0.0111567	0	0.27201
TCGA-YG-AA3P		Pre	0	TCGA	439	0			Female	52	Stage IIB	I/II	[Unknown]						[Not Available]	0	1994		0.0376136	0.03	0.21	0.830784	0.2372	0.0415	-0.9635	-1.1464	-1.2727	-0.7556	-1833.71	284.248	-3870.54										1	0.0302459	0	0.00477589	0.112124
TCGA-Z2-A8RT		Pre	0	TCGA	839	0			Female	31	Stage IIB	I/II	WHITE						[Not Available]	0	2531		0.221996	0.17	0.1	11.7561	0.4472	0.0205	0.6918	1.3696	0.783	-0.1348	-535.902	688.09	-2090.39										0	0.0257794	0.0169981	0.0378917	0.149654
TCGA-Z2-AA3S	NR	Pre	0	TCGA	2950	0			Male	47	Stage IA	I/II	WHITE		Distant Metastasis	Lung		2727	[Not Available]	1	1429		0.0975817	0.09	0.09	13.5255	0.4159	0.0815	-0.2281	0.3438	-0.7403	-0.7098	-1295.69	455.332	-3018.98										0	0.0312137	0	0.00415976	0.180282
TCGA-Z2-AA3V		Pre	0	TCGA	486	0			Female	46	Stage IA	I/II	WHITE						[Not Available]	0	2081		0.502289	0.55	0.04	14.8527	-0.7598	-0.4815	0.9751	2.1147	-0.8541	-0.18	803.714	-149.25	218.58										0	0.0391145	0.0231095	0	0.195933
[truncated: 24 more columns]

## Sheet: immune gene list
Gene	Gene Family	Immune Checkpoint
ADORA2A	Receptor	Inhibitory
ARG1	Enzyme	Inhibitory
BTLA	Immunoglobulin	Inhibitory
BTN3A1	Butyrophilins	Stimulatory
BTN3A2	Butyrophilins	Stimulatory
CCL5	Chemokine	Stimulatory
CD27	TNFR	Stimulatory
CD274	B7/CD28	Inhibitory
CD276	B7/CD28	Inhibitory
CD28	B7/CD28	Stimulatory
CD40	TNFR	Stimulatory
CD40LG	TNF	Stimulatory
CD70	TNF	Stimulatory
CD80	B7/CD28	Stimulatory
CTLA4	Receptor	Inhibitory
CX3CL1	CXC chemokine	Stimulatory
CXCL10	CXC chemokine	Stimulatory
CXCL9	CXC chemokine	Stimulatory
EDNRB	Receptor	Inhibitory
ENTPD1	Ectonucleotidase	Stimulatory
GZMA	Granzyme	Stimulaotry
HAVCR2	Immunoglobulin	Inhibitory
HLA-A	MHC Class I	Antigen presentation
HLA-B	MHC Class I	Antigen presentation
HLA-C	MHC Class I	Antigen presentation
HLA-DPA1	MHC Class II	Antigen presentation
HLA-DPB1	MHC Class II	Antigen presentation
HLA-DQA1	MHC Class II	Antigen presentation
HLA-DQA2	MHC Class II	Antigen presentation
HLA-DQB1	MHC Class II	Antigen presentation
HLA-DQB2	MHC Class II	Antigen presentation
HLA-DRA	MHC Class II	Antigen presentation
HLA-DRB1	MHC Class II	Antigen presentation
HLA-DRB3	MHC Class II	Antigen presentation
HLA-DRB4	MHC Class II	Antigen presentation
HLA-DRB5	MHC Class II	Antigen presentation
HMGB1	HMG-box	Stimulatory
ICAM1		Stimulatory
ICOS	B7/CD28	Stimulatory
ICOSLG	Ligand	Stimulatory
IDO1	Enzyme	Inhibitory
IFNA1	Cytokine	Stimulatory
IFNA2	Cytokine	Stimulatory
IFNG	Cytokine	Stimulatory
IL10	Cytokine	Inhibitory
IL12A	Cytokine	Stumulatory
IL13	Cytokine	Inhibitory
IL1A	Cytokine	Stimulatory
IL1B	Cytokine	Stimulatory
IL2	Cytokine	Stimulatory
IL2RA	Type I cytokine receptor	Stimulatory
IL4	Cytokine	Inhibitory
ITGB2	Integrin	Stimulatory
KIR2DL1	KIR	Inhibitory
KIR2DL2	KIR	Inhibitory
KIR2DL3	KIR	Inhibitory
LAG3	Immunoglobulin	Inhibitory
MICA	MHC Class I
MICB	MHC Class I
PDCD1	B7/CD28	Inhibitory
PDCD1LG2	B7/CD28
PRF1	Pore	Stimulatory
SELP	Selectin	Stimulatory
SLAMF7	SLAM	Inhibitory
TGFB1	Cytokine	Inhibitory
TIGIT	PVR	Inhibitory
TLR4	Receptor	Stimulatory
TNF	Cytokine	Stimulatory
TNFRSF14	TNFR	Stimulatory
TNFRSF18	TNFR	Stimulatory
TNFRSF4	TNFR	Stimulatory
TNFRSF9	TNFR	Stimulatory
TNFSF4	TNF	Stimulatory
TNFSF9	TNF	Stimulatory
VEGFA	Growth factor	Inhibitory
VEGFB	Growth factor	Inhibitory
C10orf54	Immunoglobulin	Inhibitory
VTCN1	B7/CD28	Inhibitory
B7-H6	Butyrophilins
HHLA2	Butyrophilins
BTN1A1	Butyrophilins
BTN2A1	Butyrophilins
BTN2A2	Butyrophilins
BTN3A3	Butyrophilins
BTNL10	Butyrophilins
BTNL2	Butyrophilins
BTNL3	Butyrophilins
BTNL4	Butyrophilins
BTNL5	Butyrophilins
BTNL6	Butyrophilins
BTNL8	Butyrophilins
BTNL9	Butyrophilins
CD112	Nectin and Nectin-like ligand/receptor co-signalling molecules
CD150	SLAM
PVR	Nectin and Nectin-like ligand/receptor co-signalling molecules
CD160
CD2	SLAM
CD200
CD26
CD58	SLAM
CD7
CD86	Butyrophilins
CD96	Nectin and Nectin-like ligand/receptor co-signalling molecules
CLEC7A
CLECL1
CRTAM	Nectin and Nectin-like ligand/receptor co-signalling molecules
DAP12
CD226	Nectin and Nectin-like ligand/receptor co-signalling molecules
EPHB6
ITGB1
ITGB7
KIR2DL4	KIR	Stimulatory
KIR2DL5A	KIR	Inhibitory
KIR2DL5B	KIR	Inhibitory
KIR2DS1	KIR	Stimulatory
KIR2DS2	KIR	Stimulatory
KIR2DS3	KIR	Stimulatory
KIR2DS4	KIR	Stimulatory
KIR2DS5	KIR	Stimulatory
KIR3DL1	KIR	Inhibitory
KIR3DL2	KIR	Inhibitory
KIR3DS1	KIR	Stimulatory
LAIR1	LAIR
LAIR2	Nectin and Nectin-like ligand/receptor co-signalling molecules
LILRA3	ILT/CD85
LILRA4	ILT/CD85
LILRB1	ILT/CD85
LILRB2	ILT/CD85
LILRB3	ILT/CD85
LILRB4	ILT/CD85
LIMR1
LIMR4
NCR3LG1	B7/CD28
NECTIN-3	Nectin and Nectin-like ligand/receptor co-signalling molecules
PDCD6	Butyrophilins
PVRIG	Nectin and Nectin-like ligand/receptor co-signalling molecules
SLAMF3	SLAM
SLAMF3	SLAM
SLAMF5	SLAM
SLAMF6	SLAM
SLAMF7	SLAM
SLAMF8	SLAM
SLAMF9	SLAM
TIM1	TIM
TIM4	TIM
TMIGD2	Butyrophilins
TNFA	TFN superfamily
TNFB	TFN superfamily
TNFRSF13B	TFN superfamily
TNFRSF13C	TFN superfamily
TNFRSF14	TFN superfamily
TNFRSF18	TFN superfamily
TNFRSF19L	TFN superfamily
TNFRSF1B	TFN superfamily
TNFRSF25	TFN superfamily
TNFRSF5	TFN superfamily
TNFRSF8	TFN superfamily
TNFSF13B	TFN superfamily
TNFSF14	TFN superfamily
TNFSF15	TFN superfamily
TNFSF5	TFN superfamily
TNFSF7	TFN superfamily
TNFSF8	TFN superfamily
TNFSF9	TFN superfamily
HLA-DMA	MHC Class II
HLA-DMB	MHC Class II
HLA-DOA	MHC Class II
HLA-DOB	MHC Class II
HLA-E	MHC Class I
HLA-F	MHC Class I
HLA-G	MHC Class I
HLA-H	MHC Class I
HLA-J	MHC Class I
HLA-K	MHC Class I
HLA-L	MHC Class I
